# Supplementary material
Source: PubMed Central journal article supplement (PMC3319072)

## **Supporting Information:**

### **Supplemental Methods**

#### ***FT-ARM Theoretical False Peptide Match Simulation***

The program was developed in-house using the C++ programming language. This program is a branch from the FT-ARM code which allows the user to input a FASTA database, a center mass, an isolation width, a number of replicates, and a match count threshold. The following parameters were used to generate simulation data: 750 m/z center, 100 m/z width, 5 replicates, and 1-16 match count threshold. Given the input parameters the program calculates tryptic peptides whose m/z value lie within the isolation window of interest. For each peptide in the database, a random subset of b and y fragment ions are sampled without replacement from that target peptide. This data stream is designed to simulate the hypothetical or spectral library data within the dot product calculation of FT-ARM. This set of fragment ions is utilized for an FT-ARM calculation against all other queried peptides in the database which fall in the isolation window and have a predicted hydrophobicity<sup>30</sup> within  $\pm 0.5$  (SSRCalc)<sup>30</sup>. The data stream of peptides calculated from the FASTA database within a set hydrophobicity window are designed to simulate the multiplexed data acquired by the mass spectrometer. All predicted b and y fragment ions are considered from the queried peptides in this calculation. In this way, any peptide which has met the latter criteria can contribute to the false identification of the target peptide. Target peptides are not scored against themselves during this simulation. If the number of matching b and y ions exceeds the match count for a given query this is termed a false positive match from the database. The percentage of false positive matches has been

calculated by taking the average of 5 replicate simulations and dividing by the total number of queries in the FT-ARM search (# of peptides residing in the m/z window of interest).

### ***Post FT-ARM Data Processing***

FT-ARM output includes peak areas for identified peptides integrated directly from score chromatograms, however, normalization and other post processing was performed using Excel (Microsoft, Redmond, WA) or R: A Language and Environment for Statistical Computing (R Group, Vienna, Austria). Specifically, quantification data presented in the BSA dilution series (DAFLGSFLYEYSR and VPQVSTPTLVEYSR) here has been normalized to a reference analyte yeast enolase 2 (AVDDFLISLDGTANK). Peptide areas were extracted from SRM data using Xcalibur (Thermo Scientific, Bremen, Germany).

All peptides above 5% FDR were quantified in the *E. coli* dilution series. Peptides identified were normalized to a separate FT-ARM acquisition on *E. coli* lysate without the yeast lysate background. Each peptide sequence detected was normalized to the same sequence identified in the reference acquisition. Each dilution was analyzed in triplicate to provide statistics. Observed ratios (normalized to the reference acquisition) were plotted against the dilution ratio. In bar plots shown, “whiskers” represent one standard deviation, boxes represent 25<sup>th</sup> and 75<sup>th</sup> quantile, notches represent 95% confidence interval for determining difference between two medians, and the solid line represents the median of the data.

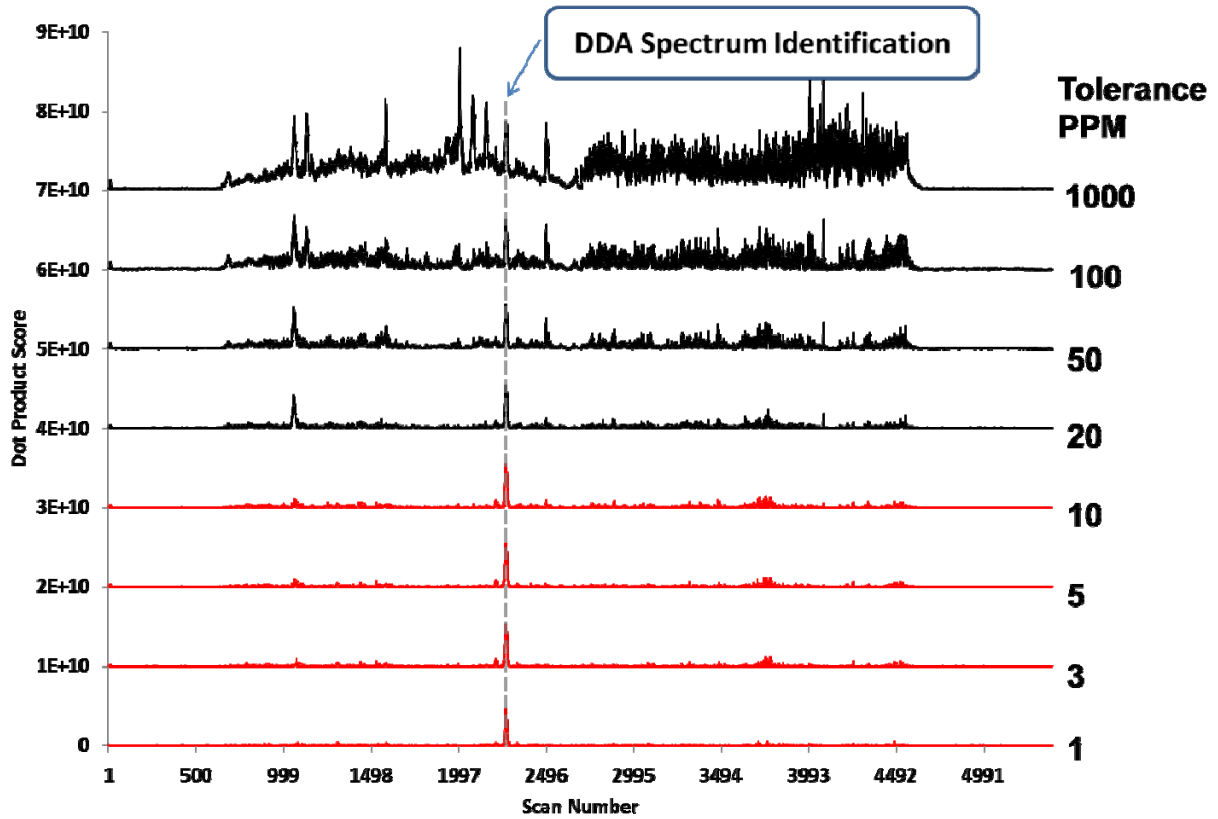

Supplemental Figure 1

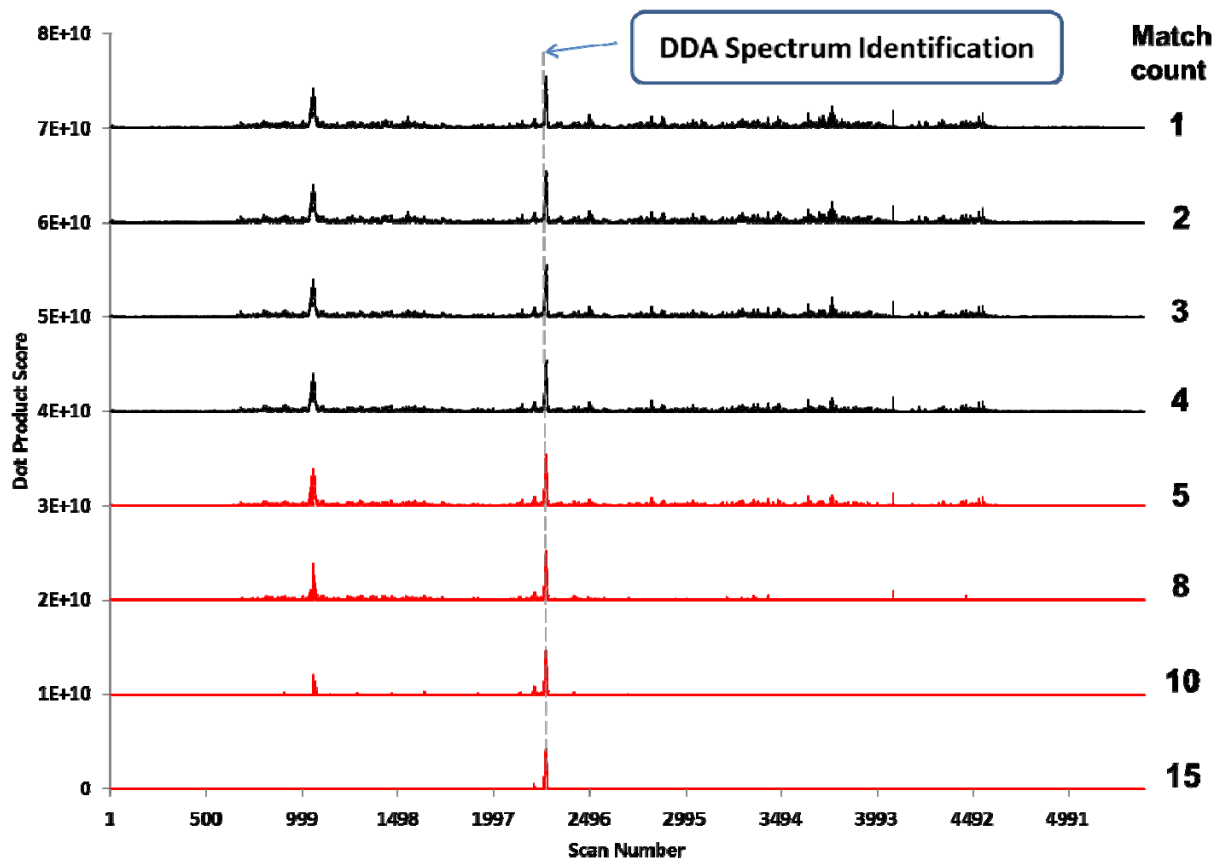

**Supplemental Figure 2**

**Supplemental Figures 1-2. A)** Effect of fragment mass tolerance on FT-ARM identification of a single tryptic peptide (*LGANAILGVSLAASR*) in a yeast whole cell lysate digest spiked with digested BSA. Tolerance of 10 ppm smaller yields highly specific detection. **B)** Effect of match count on FT-ARM identification of the same tryptic peptide with the ppm tolerance set to 20 ppm.

Lists of peptide identifications for both DIA-FT-ARM and DDA-Mascot have been provided in **Supplemental Tables 1-2**.

Supplemental Table 1: DIA-FTARM Peptide Identifications (<5% FDR)

| peptide                         | q-value | FT-ARM   | m/z 2+  | m/z 3+  | scan # | RT    | protein | match count |
|---------------------------------|---------|----------|---------|---------|--------|-------|---------|-------------|
| AAAPTVMFLDELDSIAK               | 0.006   | 1.55E+05 | 880.477 | 587.321 | 5504   | 89.7  | YDL126C | 10          |
| AAEAATDLTYR                     | 0.007   | 1.84E+05 | 641.817 | 428.214 | 1387   | 28.8  | YOR230W | 9           |
| AAEEADADAELADEEDAIHDEL          | 0.000   | 4.21E+04 | 1171.49 | 781.331 | 2827   | 72.8  | YCL043C | 10          |
| AAEPHAVSLAWSADGQTLFAGYTDNVIR    | 0.007   | 4.90E+04 | 1480.73 | 987.489 | 3910   | 65.4  | YMR116C | 11          |
| AAGANVDNVWADVYAK                | 0.000   | 3.98E+05 | 832.407 | 555.274 | 3624   | 61.4  | YDL130W | 12          |
| AAGLVDIATVLST SAYLIESK          | 0.032   | 2.60E+04 | 1061.59 | 708.06  | 6733   | 116.1 | YER055C | 10          |
| AAPIVDDEETEFDIYNSK              | 0.028   | 1.94E+04 | 1028.47 | 685.985 | 2441   | 62.9  | YER070W | 8           |
| ADDDSVTIISAGNDK                 | 0.010   | 6.61E+05 | 760.857 | 507.574 | 1833   | 35.5  | YMR116C | 15          |
| ADLMLYVSK                       | 0.000   | 8.69E+05 | 520.278 | 347.188 | 3071   | 53.6  | YDR385W | 8           |
| ADTGIAVEGATDAAR                 | 0.032   | 1.02E+05 | 709.35  | 473.235 | 1453   | 29.9  | YGL008C | 10          |
| ADYANGVLT LTVPK                 | 0.010   | 5.10E+05 | 731.401 | 487.936 | 3613   | 61.3  | YBR072W | 10          |
| AEAESLVAEQLSNITR                | 0.000   | 1.83E+05 | 901.468 | 601.315 | 3680   | 62.3  | YGR086C | 15          |
| AEAPKPEVPEDEPEGEPDVK            | 0.021   | 1.46E+05 | 1081.51 | 721.343 | 1463   | 30    | YCR088W | 10          |
| AEELNISGEFFR                    | 0.010   | 6.66E+05 | 706.346 | 471.233 | 4103   | 67.9  | YIL133C | 13          |
| AEWLYDEGFDSIK                   | 0.000   | 1.06E+06 | 851.386 | 567.926 | 4359   | 71.5  | YPL106C | 16          |
| AELDPLDIDAVLLTGGVSFTPK          | 0.032   | 4.91E+04 | 1136.11 | 757.742 | 6298   | 105.7 | YHR064C | 10          |
| AELINNLGTIAK                    | 0.000   | 1.52E+06 | 628.864 | 419.578 | 2987   | 52.4  | YMR186W | 11          |
| AEPIDEEVSLAIENGINPR             | 0.010   | 3.65E+05 | 1090.07 | 727.046 | 4813   | 78.1  | YDR385W | 14          |
| AEQLYEGPADDANCIAIK              | 0.000   | 3.42E+05 | 960.954 | 640.972 | 2835   | 50.1  | YDR385W | 11          |
| AEQVFQNVK                       | 0.026   | 4.04E+05 | 531.783 | 354.857 | 1256   | 26.8  | YIL051C | 8           |
| AEVSDVGNAILDGADCVMLSGETAK       | 0.000   | 2.94E+06 | 1233.08 | 822.389 | 5284   | 85.7  | YAL038W | 18          |
| AEVSDVGNVLDGADCVMLSGETAK        | 0.000   | 2.31E+06 | 1226.07 | 817.717 | 5284   | 85.7  | YOR347C | 12          |
| AFEHTADYDAAISDFFR               | 0.000   | 7.65E+05 | 988.445 | 659.299 | 4727   | 76.8  | YLR028C | 12          |
| AFIDEQPQGISSEPIPLGFTFSFPASQNK   | 0.000   | 1.68E+05 | 1606.8  | 1071.54 | 4011   | 102.2 | YGL253W | 10          |
| AFPLADAALTQQILDVVQQAANLR        | 0.006   | 1.43E+05 | 1283.7  | 856.138 | 7144   | 126.6 | YEL026W | 19          |
| AGAGHSNTLQVSTV                  | 0.000   | 1.89E+06 | 671.341 | 447.897 | 1427   | 29.5  | YAL038W | 9           |
| AGANSMIQNVVSDTISETAAR           | 0.000   | 3.75E+04 | 1125.54 | 750.694 | 2542   | 65.5  | YLL026W | 8           |
| AGAPVDALINQIVLLEK               | 0.000   | 2.32E+05 | 931.043 | 621.031 | 6440   | 109   | YHR183W | 17          |
| AGAVAPEDIWVR                    | 0.000   | 1.40E+06 | 642.341 | 428.563 | 3212   | 55.7  | YLR340W | 10          |
| AGELTQEELER                     | 0.000   | 1.93E+06 | 637.815 | 425.546 | 1442   | 29.7  | YDR450W | 11          |
| AHPDVLTVMLQMLDDGR               | 0.025   | 1.04E+05 | 955.977 | 637.654 | 6292   | 105.6 | YIL026W | 12          |
| AHSSMVGFDPQR                    | 0.016   | 1.91E+05 | 722.854 | 482.238 | 2428   | 44.1  | YCR012W | 10          |
| AIEMGLTWGAHQFPIGFGIK            | 0.006   | 2.17E+05 | 1208.13 | 805.756 | 5649   | 92.5  | YAL003W | 15          |
| AIEQLNYTPIK                     | 0.007   | 3.21E+05 | 645.359 | 430.575 | 2577   | 46.3  | YER165W | 11          |
| AIFEELSDIPVSVELASDFLDR          | 0.020   | 4.73E+04 | 1233.13 | 822.42  | 6739   | 116.2 | YKL104C | 10          |
| AIGYNPTNQLVQDIINADSSLR          | 0.006   | 1.52E+05 | 1201.62 | 801.415 | 5924   | 97.9  | YGL106W | 13          |
| AIMPIIEGHDVLAQAQSGTGK           | 0.010   | 5.54E+05 | 1068.56 | 712.709 | 3623   | 61.4  | YJL138C | 15          |
| AIPGEYITYALSGYVR                | 0.006   | 1.69E+05 | 886.965 | 591.645 | 5004   | 81    | YJL136C | 10          |
| AIPSALSYVGEDEYHGGQALQQLIR       | 0.000   | 9.54E+04 | 1358.19 | 905.796 | 4845   | 78.5  | YHR064C | 12          |
| AIQVEGQPIILTGAPAINK             | 0.000   | 1.16E+05 | 967.059 | 645.042 | 3780   | 63.7  | YNR016C | 14          |
| ALDDFGVDYIELTSPVASEQSR          | 0.000   | 9.33E+04 | 1206.58 | 804.724 | 3313   | 84.9  | YDL131W | 10          |
| ALDVTNVLNFIK                    | 0.032   | 8.26E+04 | 724.411 | 483.277 | 5363   | 87.2  | YKL182W | 10          |
| ALELASAEQR                      | 0.026   | 3.19E+05 | 544.291 | 363.196 | 1401   | 29.1  | YJL167W | 8           |
| ALENPTRPFLAILGGAK               | 0.006   | 1.03E+05 | 884.509 | 590.009 | 4699   | 76.4  | YCR012W | 10          |
| ALENTNYAVDLGR                   | 0.021   | 1.57E+05 | 718.362 | 479.244 | 2473   | 44.8  | YDR129C | 10          |
| ALGGAPKPDYPIATQDTLLEYDAFLFGIPTR | 0.000   | 4.64E+04 | 1669.85 | 1113.57 | 3662   | 93.6  | YDR032C | 9           |

|                                       |       |          |         |         |      |       |           |    |
|---------------------------------------|-------|----------|---------|---------|------|-------|-----------|----|
| ALGIMALLDEGETDWK                      | 0.006 | 2.70E+05 | 881.44  | 587.962 | 5679 | 93.1  | YBR011C   | 12 |
| ALLPHLTNAIVETNK                       | 0.026 | 3.48E+05 | 817.467 | 545.314 | 3141 | 54.6  | YLR249W   | 8  |
| ALNGVSTDVQGTDFSEVSYDSVLER             | 0.000 | 2.68E+04 | 1344.64 | 896.759 | 2824 | 72.7  | YLL050C   | 8  |
| ALPDAVTIIEPK                          | 0.000 | 9.87E+05 | 633.869 | 422.915 | 3512 | 59.9  | YNL178W   | 11 |
| ALTEQAQTLTLSSR                        | 0.032 | 5.91E+04 | 759.91  | 506.942 | 2223 | 41.1  | YLR438W   | 10 |
| ALYELLSAADQK                          | 0.025 | 1.09E+05 | 661.354 | 441.238 | 3677 | 62.2  | YER110C   | 9  |
| AMYTLSAQDEVFSLAFSPNR                  | 0.000 | 4.04E+04 | 1124.04 | 749.697 | 3457 | 88.5  | YMR116C   | 8  |
| ANELLINVK                             | 0.000 | 7.31E+06 | 507.303 | 338.538 | 2521 | 45.5  | YOL086C   | 11 |
| ANFEIDLPAK                            | 0.000 | 4.37E+05 | 616.812 | 411.543 | 3342 | 57.6  | YGL245W   | 9  |
| APEAEQVLSAAATFPIAQPATDVEAR            | 0.006 | 2.06E+05 | 1327.18 | 885.12  | 2784 | 49.4  | YDL082W   | 10 |
| APEALFHPSVLGLESAGIDQTTYNSIMK          | 0.000 | 6.62E+04 | 1495.25 | 997.171 | 3235 | 56    | YFL039C   | 10 |
| APEGELGDSLQTAQFDEGK                   | 0.007 | 3.12E+04 | 932.434 | 621.958 | 3685 | 62.3  | YEL034W   | 11 |
| APFDLFESK                             | 0.000 | 9.51E+05 | 527.266 | 351.847 | 3791 | 63.8  | YMR186W   | 8  |
| APIVAYAELIAAR                         | 0.030 | 7.55E+04 | 679.396 | 453.266 | 4632 | 75.4  | YGL245W   | 10 |
| APLEEVISNDYLNK                        | 0.006 | 1.04E+05 | 859.454 | 573.305 | 4244 | 69.9  | YOR332W   | 10 |
| APYNISSLASEYALK                       | 0.020 | 4.16E+04 | 813.922 | 542.951 | 4259 | 70.1  | YIL116W   | 10 |
| AQFETLTAPLVK                          | 0.000 | 5.13E+05 | 659.374 | 439.919 | 3372 | 58    | YJR045C   | 11 |
| AQLTSSSGNIIVVSNR                      | 0.020 | 6.35E+04 | 851.958 | 568.308 | 2059 | 38.8  | YBR126C   | 13 |
| AQPTVSSILEER                          | 0.010 | 3.22E+05 | 729.875 | 486.919 | 2898 | 51    | YBL099W   | 12 |
| AQYNEIQGWDHLSLLPTFGAK                 | 0.000 | 4.60E+04 | 1194.6  | 796.738 | 3732 | 95.3  | YLR044C   | 8  |
| ASAPGSVILLENLR                        | 0.010 | 4.29E+05 | 720.414 | 480.612 | 4223 | 69.6  | YCR012W   | 10 |
| ASGEIVSINQINEAHPK                     | 0.000 | 1.43E+05 | 954.495 | 636.666 | 2125 | 39.7  | YMR242C   | 11 |
| ASGTVVADTGDGFGSIAK                    | 0.000 | 5.28E+05 | 847.933 | 565.625 | 2969 | 52.1  | YLR354C   | 20 |
| ASLNVGNVPLPGSVPEGTIVSNVEEKPGDR        | 0.000 | 2.42E+05 | 1524.3  | 1016.54 | 2956 | 76.1  | YFR031C-A | 15 |
| ASLVPGTVLILAGR                        | 0.010 | 4.52E+05 | 740.467 | 493.98  | 5888 | 97.2  | YLR448W   | 11 |
| ATAGDTHLGGEDFDNR                      | 0.000 | 5.18E+05 | 838.369 | 559.248 | 1224 | 26.3  | YAL005C   | 16 |
| ATDGGAHGVINVSVEAAIEASTR               | 0.000 | 1.77E+06 | 1156.58 | 771.387 | 3303 | 57    | YOL086C   | 18 |
| ATQEMDVVSEELIEWLAANYK                 | 0.024 | 3.40E+04 | 1297.13 | 865.088 | 6189 | 103.3 | YBR143C   | 10 |
| ATNGGAHGIINVSVEAAIEASTR               | 0.000 | 1.22E+06 | 1163.09 | 775.731 | 3298 | 57    | YMR303C   | 10 |
| ATNGGSHGVINVSVEAAIEASTR               | 0.000 | 1.47E+06 | 1164.08 | 776.391 | 3303 | 57    | YBR145W   | 12 |
| ATVDFEPLCVHLVSNLEQLSSEALEAAR          | 0.000 | 5.05E+05 | 1585.79 | 1057.53 | 4501 | 114.6 | YLR075W   | 9  |
| ATVPVLEQQGTVITR                       | 0.006 | 1.55E+05 | 806.457 | 537.974 | 2754 | 48.9  | YGR234W   | 13 |
| AVASSGQELSVEER                        | 0.010 | 6.73E+05 | 731.363 | 487.911 | 1288 | 27.3  | YDR099W   | 10 |
| AVDDFLISLDGTANK                       | 0.000 | 6.07E+06 | 789.904 | 526.939 | 4778 | 77.5  | YGR254W   | 18 |
| AVDDFLLSLDGTANK                       | 0.000 | 6.07E+06 | 789.904 | 526.939 | 4778 | 77.5  | YHR174W   | 18 |
| AVEALNDSSELNGEK                       | 0.032 | 4.94E+04 | 744.862 | 496.911 | 1693 | 33.5  | YER165W   | 11 |
| AVEESAEPQVILGEDGKPLSK                 | 0.032 | 1.04E+05 | 1134.09 | 756.397 | 2883 | 50.8  | YLL018C   | 10 |
| AVGDNDPIDVLEIGETIAYTGQVK              | 0.000 | 6.52E+05 | 1259.14 | 839.762 | 5884 | 97.1  | YBR011C   | 13 |
| AVGGVEVGASAAALAPK                     | 0.000 | 1.45E+06 | 649.359 | 433.242 | 1637 | 32.7  | YDR418W   | 16 |
| AVGSLTFDENYNLLDTSVGVAK                | 0.000 | 1.63E+05 | 1107.55 | 738.702 | 2912 | 75    | YNR034W-A | 11 |
| AVLEFTPETPSPLIGILENK                  | 0.032 | 8.25E+04 | 1084.6  | 723.4   | 5728 | 94    | YGR240C   | 12 |
| AVNELPTKPSTDELLEYALYK                 | 0.000 | 6.08E+05 | 1254.17 | 836.448 | 5149 | 83.4  | YGR037C   | 14 |
| AVTASQTTIAEIVISNLYDDSK                | 0.018 | 2.10E+04 | 1113.56 | 742.709 | 3857 | 98.4  | YCR009C   | 7  |
| AVVAGAGTGGTISGISK                     | 0.016 | 1.97E+05 | 723.402 | 482.603 | 1638 | 32.7  | YGR155W   | 15 |
| AVVESVGAEVDEAR                        | 0.010 | 2.48E+05 | 715.86  | 477.576 | 1988 | 37.7  | YDR382W   | 14 |
| AWNLNQFQIEADFIGHNSNINTLTASPDGTLIASAGK | 0.000 | 1.59E+05 | 1964.98 | 1310.32 | 3639 | 93.1  | YMR116C   | 13 |
| CAADDLDATVVQLTVLTK                    | 0.016 | 4.34E+04 | 1003.01 | 669.01  | 4101 | 104.4 | YNL134C   | 8  |
| CLVNDPNIEIVADLSSDILSR                 | 0.018 | 1.65E+04 | 1143.59 | 762.726 | 4857 | 123.7 | YOR184W   | 7  |
| DAGLSTSDISEVLLVGGMSR                  | 0.028 | 1.89E+04 | 1004.01 | 669.674 | 3456 | 88.5  | YJR045C   | 10 |
| DAGTIAGLNVLR                          | 0.007 | 2.42E+05 | 600.341 | 400.563 | 3537 | 60.2  | YAL005C   | 10 |
| DAQIVVGTGPR                           | 0.034 | 2.80E+05 | 556.807 | 371.54  | 1391 | 28.9  | YJL138C   | 9  |
| DASLVDYVQVR                           | 0.000 | 5.63E+05 | 632.83  | 422.223 | 3377 | 58.1  | YJR123W   | 10 |
| DASSLTDQITGLIEVNEK                    | 0.028 | 1.72E+04 | 1023.53 | 682.692 | 3601 | 92.1  | YGL106W   | 8  |
| DAVVTVPAYFNDSQR                       | 0.006 | 2.24E+05 | 841.413 | 561.278 | 3184 | 55.3  | YER103W   | 10 |
| DESSPYAAMLAQAQDVAAK                   | 0.007 | 4.33E+04 | 919.435 | 613.293 | 3890 | 65.1  | YCR031C   | 12 |
| DETLDDWFDNDLSLFPSTGFGFPR              | 0.000 | 3.57E+05 | 1345.61 | 897.406 | 4609 | 117.3 | YBR072W   | 12 |

|                                    |       |          |         |         |      |       |         |    |
|------------------------------------|-------|----------|---------|---------|------|-------|---------|----|
| DFDGTGALEFPSEILVEALER              | 0.000 | 3.46E+04 | 1219.09 | 813.064 | 4278 | 108.9 | YDR432W | 6  |
| DGEIMLWNLAAK                       | 0.007 | 4.26E+05 | 680.85  | 454.236 | 4857 | 78.7  | YMR116C | 10 |
| DGKPYVFFTIPD GK                    | 0.034 | 3.10E+05 | 792.409 | 528.608 | 4066 | 67.4  | YGL245W | 8  |
| DIEVVAVNDPFI SNDY AAYMVK           | 0.020 | 5.56E+04 | 1237.1  | 825.07  | 5459 | 88.9  | YJL052W | 10 |
| DIFSNDELLSDAYDAK                   | 0.000 | 4.56E+05 | 908.418 | 605.948 | 4535 | 74    | YKL056C | 19 |
| DIGGSSSTDTFTNEIINK                 | 0.007 | 3.52E+04 | 949.953 | 633.637 | 3315 | 57.2  | YNL037C | 12 |
| DINSYTNSTSVINELR                   | 0.007 | 3.33E+04 | 913.45  | 609.302 | 3685 | 62.3  | YGR061C | 10 |
| DIYGWTQTSLDDYPIK                   | 0.000 | 3.84E+05 | 957.96  | 638.976 | 4160 | 68.7  | YGL253W | 11 |
| DLAAATAESAPNAAILVISNPVNSTVPIVAQVLK | 0.000 | 6.21E+04 | 1679.44 | 1119.96 | 4267 | 108.6 | YKL085W | 9  |
| DLNKPFLMPVEDIFISIGR                | 0.032 | 5.67E+04 | 1089.57 | 726.714 | 5853 | 96.5  | YOR187W | 10 |
| DLSEASVYPEYALPK                    | 0.006 | 3.41E+05 | 841.42  | 561.282 | 3659 | 61.9  | YER131W | 13 |
| DLTNLLFETALLTSGFSLEEPTSFASR        | 0.000 | 2.81E+04 | 1480.25 | 987.169 | 4500 | 114.5 | YMR186W | 6  |
| DNAEGQGESLADQAR                    | 0.026 | 6.88E+05 | 780.848 | 520.901 | 856  | 19.8  | YFL014W | 8  |
| DPANLPWASLNIDIAIDSTGVFK            | 0.000 | 5.87E+05 | 1229.14 | 819.76  | 5399 | 87.8  | YJR009C | 11 |
| DPANLPWGSSNVDAIDSTGVFK             | 0.000 | 6.70E+05 | 1202.09 | 801.732 | 5399 | 87.8  | YGR192C | 17 |
| DPITIVPAEDGSGAGA VIAALSEK          | 0.000 | 2.74E+05 | 1176.62 | 784.748 | 3682 | 94.1  | YFR053C | 11 |
| DPMGNITFSGLANATDSAPTSK             | 0.000 | 3.91E+04 | 1155.04 | 770.362 | 3367 | 86.3  | YGR240C | 9  |
| DQVVLIVSSPTANR                     | 0.006 | 1.31E+05 | 813.944 | 542.965 | 2914 | 51.3  | YDR074W | 13 |
| DQYVPEVSALDLR                      | 0.000 | 1.73E+06 | 796.402 | 531.27  | 3096 | 53.9  | YDR447C | 11 |
| DTLPLGFTFSYPASQNK                  | 0.000 | 1.83E+05 | 943.47  | 629.316 | 4850 | 78.6  | YFR053C | 10 |
| DVAAQDFINAYASF LQR                 | 0.000 | 1.12E+05 | 964.979 | 643.655 | 5690 | 93.3  | YNL302C | 11 |
| DVNNVWIQSVK                        | 0.000 | 4.47E+05 | 651.346 | 434.566 | 3187 | 55.3  | YAR042W | 9  |
| DVPEPITEFTSPPLDGLLENIK             | 0.024 | 3.19E+04 | 1269.17 | 846.451 | 6214 | 103.8 | YOR204W | 10 |
| DVQEAGSTEPIVK                      | 0.007 | 2.87E+05 | 686.851 | 458.237 | 1207 | 26    | YBR121C | 10 |
| DVQQIDYK                           | 0.034 | 2.70E+05 | 504.753 | 336.838 | 1081 | 23.9  | YNL096C | 8  |
| DVTFLNDCVGPVEEAAVK                 | 0.000 | 7.07E+05 | 953.467 | 635.98  | 4500 | 73.6  | YCR012W | 11 |
| DYGLIEEFGVALR                      | 0.000 | 1.09E+06 | 781.907 | 521.607 | 3653 | 61.8  | YML028W | 10 |
| DYRPAEETEAQAEPEVA                  | 0.000 | 1.75E+06 | 952.929 | 635.622 | 1755 | 34.4  | YNL178W | 17 |
| EAQADAAAEIAEDA AEADAGKPK           | 0.021 | 1.42E+05 | 1186.05 | 791.035 | 3793 | 63.8  | YLR150W | 11 |
| EASYVNIPVIALTDL DSPSEFVDVAIPCNNR   | 0.000 | 1.24E+05 | 1681.33 | 1121.23 | 4187 | 106.6 | YGR214W | 8  |
| EAVESADLILSVGALLSDFNTGFSFSYSYK     | 0.000 | 1.92E+05 | 1542.26 | 1028.51 | 5861 | 149.5 | YLR044C | 16 |
| EELFTSLGGEVFDFTK                   | 0.000 | 7.15E+05 | 966.485 | 644.659 | 4107 | 68    | YMR303C | 9  |
| EEVTEEQAEATEWAEENADNVEW            | 0.000 | 6.80E+04 | 1354.56 | 903.375 | 4399 | 112   | YGR214W | 8  |
| EEVTEGQAEATEWAEENADNVEW            | 0.000 | 6.80E+04 | 1318.55 | 879.368 | 4399 | 112   | YLR048W | 8  |
| EFEEGGGLPEQPLNPDFSK                | 0.000 | 8.84E+04 | 1045.49 | 697.329 | 2336 | 60.2  | YER025W | 8  |
| EFGTTPEKPEETPLEELAETFQDTFSGALGK    | 0.000 | 4.42E+04 | 1699.81 | 1133.54 | 4737 | 120.6 | YPL231W | 8  |
| EFQIDTLLPGLQDEVMMNIKPVQK           | 0.000 | 4.41E+05 | 1384.75 | 923.502 | 6025 | 99.8  | YGL123W | 11 |
| EGGLGPINIPLLADTNHSLSR              | 0.010 | 3.17E+05 | 1087.58 | 725.39  | 4208 | 69.4  | YML028W | 10 |
| EGIPAGWQGLDNGPESR                  | 0.020 | 3.85E+04 | 891.924 | 594.952 | 2689 | 47.9  | YCR012W | 10 |
| EIGDFEDLSTENEK                     | 0.006 | 1.07E+05 | 813.362 | 542.577 | 2799 | 49.6  | YLL018C | 10 |
| EIHAVLSADANITSNEK                  | 0.040 | 5.78E+04 | 906.46  | 604.643 | 3297 | 56.9  | YPR033C | 9  |
| EKPETLVLFVDVDTLTPAR                | 0.021 | 1.62E+05 | 1051.06 | 701.044 | 4438 | 72.7  | YFL045C | 10 |
| ELAEEGYSGVEVR                      | 0.010 | 2.52E+05 | 719.346 | 479.9   | 1963 | 37.4  | YNL178W | 11 |
| ELDEIAASLENL                       | 0.007 | 2.48E+05 | 658.833 | 439.558 | 5477 | 89.2  | YNL079C | 13 |
| ELGLTVVTDEAIEQMR                   | 0.000 | 9.28E+04 | 902.461 | 601.977 | 4960 | 80.2  | YLR359W | 10 |
| ELMDEIHQLEDMFTVDSETLR              | 0.018 | 6.62E+04 | 1276.09 | 851.061 | 6554 | 111.7 | YFR053C | 10 |
| ELMQQIENFEK                        | 0.021 | 1.47E+05 | 704.842 | 470.231 | 3633 | 61.5  | YGL253W | 10 |
| ELPGVAFLEK                         | 0.000 | 1.23E+06 | 595.327 | 397.22  | 3541 | 60.3  | YCR012W | 8  |
| ELPIEIVALINDVTGLIASYYTDPETK        | 0.016 | 5.83E+04 | 1539.81 | 1026.88 | 5081 | 129.4 | YFR053C | 8  |
| ELQFSEIDTVK                        | 0.007 | 1.73E+05 | 654.838 | 436.894 | 3092 | 53.9  | YPL160W | 9  |
| ELSWIDVENWHNLLGGSEIGTNR            | 0.020 | 5.88E+04 | 1263.6  | 842.738 | 4839 | 78.5  | YGR240C | 10 |
| ELYGNIVMSGGTTMFPGIAER              | 0.000 | 5.92E+04 | 1122.05 | 748.366 | 3207 | 82.3  | YFL039C | 8  |
| EMAFNLLGLLTPVV LELCQK              | 0.000 | 5.36E+04 | 1124.09 | 749.73  | 4667 | 118.8 | YPL231W | 7  |
| EMIQEVIVEEDLEPFEASK                | 0.018 | 3.11E+04 | 1118.04 | 745.696 | 3452 | 88.4  | YPL231W | 10 |
| ENDILVLMESER                       | 0.010 | 6.59E+05 | 724.358 | 483.241 | 4568 | 74.5  | YLR264W | 14 |
| ENILIGDSNIIESYQK                   | 0.020 | 1.24E+05 | 918.473 | 612.651 | 3962 | 66.1  | YDR166C | 9  |
| ENSLETTFSSVNTR                     | 0.016 | 1.82E+05 | 792.879 | 528.922 | 2433 | 44.2  | YDR432W | 10 |

|                                 |       |          |         |         |      |       |         |    |
|---------------------------------|-------|----------|---------|---------|------|-------|---------|----|
| ENTLLGEFDLK                     | 0.000 | 9.22E+05 | 639.832 | 426.891 | 4437 | 72.7  | YDL229W | 10 |
| EQAANLIAAGADGLR                 | 0.010 | 3.35E+05 | 735.389 | 490.595 | 3098 | 54    | YHR216W | 13 |
| EQIYQIFTLPPTTQVLLSATMPNDVLEVTTK | 0.000 | 2.85E+04 | 1852    | 1235    | 5868 | 149.6 | YJL138C | 6  |
| EQPTCSLITGENWTK                 | 0.020 | 4.36E+04 | 853.906 | 569.607 | 1484 | 30.4  | YJR073C | 10 |
| EQQDNFAIESYQK                   | 0.006 | 8.43E+04 | 800.368 | 533.914 | 2094 | 39.3  | YPL028W | 10 |
| ESGNYLALDLGGTNLR                | 0.000 | 3.98E+05 | 846.931 | 564.957 | 3904 | 65.3  | YFR053C | 11 |
| ETAENYLGTTVNDVAVTVPAYFNDSQR     | 0.000 | 2.66E+06 | 1487.71 | 992.14  | 3465 | 59.3  | YBL075C | 10 |
| ETAPVIDTLAAGYGK                 | 0.000 | 1.24E+06 | 753.396 | 502.6   | 3368 | 57.9  | YGL103W | 13 |
| ETELSLQLSLR                     | 0.007 | 3.31E+05 | 644.859 | 430.242 | 4317 | 70.9  | YCL040W | 10 |
| ETFLAGLIDSDGYVTDEHGK            | 0.032 | 1.14E+05 | 1140.56 | 760.706 | 4923 | 79.7  | YDL185W | 10 |
| ETGELEELLEPILAN                 | 0.000 | 5.18E+05 | 835.43  | 557.289 | 6239 | 104.4 | YGL035C | 12 |
| ETITEALNLPEANLSEIPSLQDAIQR      | 0.000 | 2.51E+05 | 1433.25 | 955.833 | 5725 | 93.9  | YGR061C | 15 |
| ETNPGTDVTVSSVESVLAHL            | 0.020 | 1.19E+05 | 1028.02 | 685.68  | 6162 | 102.7 | YLR109W | 13 |
| ETSTDPSYDAFLEK                  | 0.006 | 2.09E+05 | 801.862 | 534.911 | 2929 | 51.5  | YLL050C | 10 |
| ETVESSSQTALSK                   | 0.010 | 5.25E+05 | 748.36  | 499.242 | 913  | 20.8  | YDR385W | 15 |
| EVASAALSELAGTK                  | 0.016 | 1.82E+05 | 730.404 | 487.272 | 3843 | 64.5  | YER110C | 13 |
| EVDQVIVVTDNPFANQAWAK            | 0.000 | 5.75E+04 | 1172.1  | 781.737 | 3362 | 86.2  | YLR109W | 8  |
| EVIDTILALVK                     | 0.007 | 1.99E+05 | 607.374 | 405.252 | 5792 | 95.3  | YLR044C | 10 |
| EVQGSTLAQLTSK                   | 0.007 | 1.98E+05 | 681.367 | 454.581 | 2142 | 40    | YLR441C | 10 |
| EVQNSTLAQLTSK                   | 0.000 | 1.07E+06 | 709.878 | 473.588 | 2213 | 40.9  | YML063W | 12 |
| EYLNLPFHIVPGTYIQR               | 0.000 | 1.25E+06 | 1086.06 | 724.376 | 3923 | 65.6  | YMR230W | 11 |
| FADGFLIHSGQPVNDFIDTATR          | 0.000 | 1.62E+06 | 1211.1  | 807.733 | 4704 | 76.4  | YNL178W | 16 |
| FAIPAINVTSSTAVAAEAAR            | 0.010 | 4.94E+05 | 1080.59 | 720.727 | 5263 | 85.3  | YKL060C | 13 |
| FDDMELDENLLR                    | 0.010 | 5.20E+05 | 755.348 | 503.901 | 4153 | 68.6  | YJL138C | 15 |
| FDGILGLGYDTISVDK                | 0.006 | 2.34E+05 | 856.941 | 571.63  | 5059 | 81.9  | YPL154C | 10 |
| FDVGALMALHGEGSGEEK              | 0.007 | 2.80E+05 | 923.936 | 616.293 | 2297 | 42.2  | YLR441C | 10 |
| FEDLNAALFK                      | 0.000 | 3.17E+06 | 584.306 | 389.873 | 3761 | 63.4  | YDL229W | 10 |
| FEQASEPTTVSYEAGNSPNAER          | 0.000 | 6.67E+05 | 1357.11 | 905.079 | 2640 | 47.2  | YJR104C | 18 |
| FGDPETQAVLSLLDDQTDLAQVFLAAAEHR  | 0.016 | 2.87E+04 | 1635.82 | 1090.88 | 4876 | 124.2 | YGL234W | 8  |
| FGSGIELESLPITPGQYITVNTPIR       | 0.000 | 1.41E+05 | 1420.25 | 947.171 | 4975 | 80.5  | YGR234W | 16 |
| FINFINNANQSASNK                 | 0.020 | 3.88E+04 | 841.418 | 561.281 | 2159 | 40.2  | YDL073W | 10 |
| FISEVENTDPTQER                  | 0.006 | 2.78E+05 | 832.892 | 555.597 | 1749 | 34.3  | YKL085W | 13 |
| FISTSQSVVEPK                    | 0.007 | 3.46E+05 | 661.354 | 441.238 | 3517 | 60    | YDR463W | 9  |
| FLFENTGLDLYSNLNMIFPVDSVK        | 0.000 | 4.82E+04 | 1438.23 | 959.158 | 5870 | 149.7 | YNL041C | 5  |
| FNYVAVGDVSNLPLYDEL              | 0.000 | 7.90E+04 | 1014.5  | 676.67  | 3981 | 101.5 | YPR191W | 11 |
| FPELGAELAR                      | 0.026 | 4.16E+05 | 551.798 | 368.201 | 3246 | 56.2  | YPR074C | 9  |
| FPGWDFETEIDPELLR                | 0.000 | 6.69E+05 | 1047    | 698.334 | 3641 | 93.1  | YPL131W | 14 |
| FQPQDSTTNPSLILAAAK              | 0.000 | 1.52E+05 | 951.502 | 634.67  | 3495 | 59.7  | YLR354C | 12 |
| FSADIVTLFDLIEK                  | 0.006 | 9.61E+04 | 805.937 | 537.627 | 6454 | 109.4 | YLR354C | 11 |
| FTLEVVDVAVDAIGPEK               | 0.000 | 3.42E+05 | 901.483 | 601.324 | 6040 | 100.1 | YHR179W | 20 |
| FTNAAFPFDPEAR                   | 0.020 | 4.61E+04 | 810.384 | 540.592 | 2504 | 45.3  | YHL030W | 10 |
| FTVSAIYSDLPQQR                  | 0.006 | 3.33E+05 | 877.441 | 585.297 | 2499 | 45.2  | YJL138C | 11 |
| FVIGGPQGDAGLTGR                 | 0.010 | 2.92E+05 | 722.881 | 482.256 | 2748 | 48.8  | YDR502C | 10 |
| FVPSKPMCVEAFSEYPPPLGR           | 0.000 | 1.97E+06 | 1127.56 | 752.039 | 3498 | 59.7  | YBR118W | 10 |
| FVQGLLQNAANAIAEK                | 0.000 | 1.33E+06 | 822.939 | 548.962 | 3134 | 54.5  | YJL177W | 24 |
| FYSTQIEELPSDIATLLN              | 0.000 | 3.72E+05 | 1027.52 | 685.349 | 4251 | 108.2 | YJL138C | 11 |
| GAAEALENANDISEGLVSESLK          | 0.018 | 2.39E+04 | 1109.05 | 739.701 | 3047 | 78.3  | YLR197W | 8  |
| GAARPTGGAGTVAMWIGPDAPIVFDSVR    | 0.000 | 8.78E+04 | 1385.21 | 923.81  | 5170 | 83.7  | YML126C | 10 |
| GAAYVLGAGQVYVFGSVGK             | 0.007 | 4.09E+04 | 921.991 | 614.996 | 4390 | 72    | YJR105W | 12 |
| GADTNTPLEYLSK                   | 0.010 | 3.24E+05 | 704.851 | 470.237 | 3178 | 55.2  | YLL026W | 12 |
| GAIVGPDLAVALVIVK                | 0.000 | 4.39E+05 | 824.524 | 550.018 | 6509 | 110.7 | YBR181C | 20 |
| GASDGLLYVPHSENR                 | 0.000 | 1.17E+06 | 779.866 | 520.246 | 1176 | 25.5  | YPL131W | 8  |
| GATTEEDDALADQLR                 | 0.020 | 6.15E+04 | 802.874 | 535.585 | 2304 | 42.3  | YER090W | 10 |
| GATYGKPTNQGVNELK                | 0.006 | 9.79E+04 | 838.934 | 559.625 | 959  | 21.7  | YLR029C | 11 |
| GAVEFDPWLKPFADVLSER             | 0.032 | 4.92E+04 | 1088.56 | 726.041 | 5733 | 94.1  | YEL011W | 11 |
| GDIPGVVAFFGGLVAQEVLEK           | 0.040 | 5.72E+04 | 1008.56 | 672.71  | 7177 | 127.4 | YKL210W | 10 |
| GDIVGVEGYVGR                    | 0.007 | 3.39E+05 | 610.817 | 407.547 | 2577 | 46.3  | YDR037W | 13 |



|                                   |       |          |         |         |      |       |         |    |
|-----------------------------------|-------|----------|---------|---------|------|-------|---------|----|
| GDLGIEIPAPEVLAVQK                 | 0.000 | 1.21E+07 | 874.993 | 583.665 | 4689 | 76.2  | YAL038W | 20 |
| GDLLQEAIQFAQK                     | 0.021 | 1.37E+05 | 724.375 | 483.252 | 5383 | 87.5  | YOR362C | 12 |
| GDTYVSIQGFK                       | 0.000 | 2.74E+06 | 607.806 | 405.54  | 2777 | 49.3  | YAL038W | 13 |
| GDVDLVINYLK                       | 0.007 | 2.91E+05 | 624.845 | 416.899 | 4497 | 73.5  | YOR374W | 10 |
| GDVEEYQYLR                        | 0.007 | 2.02E+05 | 636.299 | 424.535 | 2227 | 41.2  | YBR126C | 10 |
| GEALLVVLVSSVTEANIK                | 0.000 | 1.02E+05 | 978.075 | 652.386 | 6840 | 118.8 | YOR369C | 15 |
| GEFHPVLLAETSFPVQK                 | 0.007 | 3.70E+05 | 950.004 | 633.672 | 3937 | 65.8  | YHR064C | 9  |
| GEQELEGLDTPVPK                    | 0.026 | 6.28E+05 | 808.904 | 539.605 | 2196 | 40.7  | YBR181C | 11 |
| GEYETAISTLNDAVEQGR                | 0.000 | 1.28E+05 | 976.963 | 651.645 | 4095 | 67.8  | YOR027W | 11 |
| GFALANPSITLVPPEEK                 | 0.006 | 2.70E+05 | 843.459 | 562.642 | 4244 | 69.9  | YML070W | 10 |
| GFDEAVADPTFWEDFK                  | 0.000 | 1.79E+05 | 937.418 | 625.281 | 5295 | 85.9  | YGL026C | 14 |
| GFDIPNVEGHVPLLQNEISK              | 0.000 | 8.05E+05 | 1210.63 | 807.42  | 4854 | 78.7  | YFR053C | 12 |
| GFDQSLAQSLDTITSK                  | 0.006 | 9.09E+04 | 855.931 | 570.956 | 4519 | 73.8  | YKL157W | 11 |
| GFDQTLAQALDITR                    | 0.032 | 8.02E+04 | 774.904 | 516.939 | 5303 | 86    | YHR047C | 11 |
| GFEIGSGFQGVSVPGSK                 | 0.006 | 1.54E+05 | 826.918 | 551.614 | 3829 | 64.3  | YGL148W | 10 |
| GFLSDLPDFEK                       | 0.000 | 2.51E+06 | 634.314 | 423.212 | 4677 | 76.1  | YLR340W | 12 |
| GGGQIIPTR                         | 0.000 | 1.08E+06 | 515.279 | 343.855 | 2026 | 38.3  | YDR385W | 8  |
| GGIGAVFAELNQGELITK                | 0.000 | 1.59E+05 | 909.473 | 606.651 | 4665 | 75.9  | YNL138W | 14 |
| GGIPLVFPVFGK                      | 0.007 | 2.57E+05 | 615.866 | 410.913 | 5392 | 87.7  | YMR099C | 12 |
| GGLTYNDFLVLPLVDFSPSEVSLQTK        | 0.000 | 9.96E+04 | 1448.75 | 966.171 | 6320 | 106.2 | YLR432W | 10 |
| GGLTYNDFLVLPLVNFPSAVSLQTK         | 0.000 | 5.79E+04 | 1419.26 | 946.508 | 6305 | 105.9 | YML056C | 10 |
| GGTLISYDGGQR                      | 0.000 | 9.16E+05 | 633.328 | 422.554 | 2137 | 39.9  | YKL035W | 11 |
| GHYTEGAELVDSVMDVIR                | 0.030 | 7.12E+04 | 995.981 | 664.323 | 5287 | 85.7  | YFL037W | 10 |
| GIDIVVNEVSNR                      | 0.000 | 6.86E+05 | 657.854 | 438.905 | 2917 | 51.3  | YPL106C | 11 |
| GIDLTNVTLPDTPYSK                  | 0.000 | 1.52E+06 | 917.975 | 612.319 | 3870 | 64.9  | YBR011C | 17 |
| GIDVQQVSLVINYLDPANK               | 0.016 | 6.90E+04 | 1043.56 | 696.044 | 3076 | 79.1  | YJL138C | 9  |
| GIEAAGGSADIYQVEETLSPEVVK          | 0.000 | 2.54E+04 | 1231.62 | 821.415 | 3008 | 77.3  | YDR032C | 8  |
| GIEQLESAIEK                       | 0.007 | 1.67E+05 | 608.825 | 406.219 | 3282 | 56.7  | YJR007W | 9  |
| GINSSYAVWINDVTGK                  | 0.006 | 2.57E+05 | 805.894 | 537.598 | 3564 | 60.6  | YLR355C | 17 |
| GISNEGQNASIK                      | 0.000 | 3.52E+06 | 609.31  | 406.542 | 717  | 17.1  | YKL060C | 15 |
| GISSSAIPYSR                       | 0.026 | 5.52E+05 | 569.299 | 379.868 | 1716 | 33.8  | YDR064W | 8  |
| GIVPDSSPLNVSSAR                   | 0.016 | 1.95E+05 | 749.897 | 500.267 | 2873 | 50.7  | YEL020C | 10 |
| GIVVEAYSPFGSANAPLLK               | 0.000 | 1.16E+05 | 967.025 | 645.019 | 4725 | 76.7  | YDR368W | 16 |
| GLGSSGAAVVAGVILGNEVAQLGFSK        | 0.020 | 6.22E+04 | 1201.16 | 801.108 | 6319 | 106.2 | YHR025W | 15 |
| GLILVGGYGTR                       | 0.000 | 1.93E+06 | 553.322 | 369.217 | 3056 | 53.4  | YDL055C | 9  |
| GLLSATQFTQPALTLMEK                | 0.000 | 6.54E+04 | 975.024 | 650.352 | 5270 | 85.4  | YKL182W | 12 |
| GLNTGGMGAYAPAPVATPSLLK            | 0.000 | 8.63E+04 | 1043.55 | 696.038 | 2596 | 66.9  | YGL234W | 8  |
| GLQTVVVEEDA                       | 0.000 | 9.72E+05 | 580.296 | 387.2   | 2616 | 46.9  | YDL075W | 11 |
| GLSVVDYTAILSNK                    | 0.010 | 2.45E+05 | 740.406 | 493.94  | 4218 | 69.5  | YJL167W | 11 |
| GLTPSQIGVLLR                      | 0.000 | 8.37E+05 | 627.382 | 418.591 | 4132 | 68.3  | YDR064W | 11 |
| GLVWEGSVLDPEEGIR                  | 0.006 | 3.20E+05 | 878.449 | 585.969 | 4594 | 74.9  | YNR001C | 11 |
| GMGLLTAIVIDPSK                    | 0.032 | 3.54E+04 | 707.902 | 472.271 | 5008 | 81    | YLR438W | 10 |
| GNEEVEQDEPLSLQTK                  | 0.000 | 1.11E+05 | 908.434 | 605.958 | 2085 | 39.2  | YGL137W | 13 |
| GNPTVEVELTTEK                     | 0.000 | 1.04E+07 | 708.864 | 472.912 | 2128 | 39.8  | YGR254W | 17 |
| GNVGFVFTNEPLTEIK                  | 0.000 | 3.77E+06 | 882.962 | 588.977 | 4564 | 74.5  | YLR340W | 16 |
| GNYPINAVTTMAETAIVIAEQAIAYLPNYDDMR | 0.000 | 3.16E+05 | 1758.34 | 1172.57 | 4987 | 127   | YAL038W | 12 |
| GNYTDFENTFQK                      | 0.010 | 3.37E+05 | 732.326 | 488.553 | 2753 | 48.9  | YKL182W | 14 |
| GPLVLEYETR                        | 0.007 | 2.92E+05 | 670.348 | 447.235 | 3302 | 57    | YER178W | 10 |
| GPLVVAEDNGIVK                     | 0.010 | 4.39E+05 | 737.401 | 491.936 | 3193 | 55.4  | YBR031W | 13 |
| GQCLATLLGHNDWVSQVR                | 0.000 | 8.13E+05 | 999.005 | 666.339 | 4207 | 69.4  | YMR116C | 12 |
| GQDFAPAFDVAPDWESYEYTK             | 0.006 | 1.66E+05 | 1218.54 | 812.694 | 4969 | 80.4  | YKL081W | 18 |
| GQDYVPAFDVAPDWESYDYAK             | 0.000 | 5.53E+04 | 1218.54 | 812.694 | 3183 | 81.7  | YPL048W | 11 |
| GQTPEGEDPLGKPEEELTVIPEFGGADNK     | 0.000 | 2.17E+05 | 1527.23 | 1018.49 | 2776 | 71.5  | YCL050C | 11 |
| GQTYSPAQIGGFVLNK                  | 0.000 | 5.15E+05 | 840.441 | 560.63  | 3859 | 64.7  | YJR045C | 16 |
| GQVVGSIIALDR                      | 0.007 | 1.97E+05 | 614.356 | 409.907 | 3242 | 56.1  | YML106W | 10 |
| GQVVSEEQRPGLPFTVK                 | 0.000 | 2.11E+05 | 986.529 | 658.021 | 3535 | 60.2  | YDR385W | 10 |
| GSDPDTTWLIISPNK                   | 0.006 | 2.02E+05 | 857.936 | 572.293 | 4119 | 68.1  | YCR088W | 15 |

|                                     |       |          |         |         |      |       |         |    |
|-------------------------------------|-------|----------|---------|---------|------|-------|---------|----|
| GSDIEQHPR                           | 0.026 | 3.87E+05 | 519.752 | 346.837 | 491  | 12.6  | YGR087C | 9  |
| GSLEEIIAEGQK                        | 0.000 | 6.41E+05 | 637.335 | 425.226 | 3157 | 54.9  | YDR382W | 12 |
| GSPFQCNIQVGVQVIK                    | 0.016 | 1.96E+05 | 773.906 | 516.273 | 3208 | 55.6  | YNL135C | 12 |
| GSSSLYTLVINDAGK                     | 0.000 | 1.40E+06 | 762.899 | 508.935 | 3928 | 65.7  | YLR325C | 13 |
| GTDYDFYEAWGPVFEAEAR                 | 0.000 | 9.23E+04 | 1111.99 | 741.66  | 3642 | 93.1  | YGR285C | 8  |
| GTGLMSANNIIAEGIEK                   | 0.006 | 1.67E+05 | 859.443 | 573.298 | 3894 | 65.2  | YPL231W | 11 |
| GTIADGAPIVPISAQLK                   | 0.006 | 3.61E+05 | 825.975 | 550.986 | 3639 | 61.6  | YER025W | 10 |
| GTIEIVSDVK                          | 0.000 | 2.62E+06 | 530.798 | 354.201 | 2141 | 40    | YLR340W | 12 |
| GTITWIAPAGEYTLDEK                   | 0.000 | 9.10E+05 | 932.97  | 622.316 | 4150 | 68.6  | YDL185W | 15 |
| GTLEHGNGWVTSLATSAGQPNNLLSASR        | 0.000 | 7.08E+05 | 1419.23 | 946.49  | 4860 | 78.8  | YMR116C | 14 |
| GTQAPNLQER                          | 0.044 | 2.31E+05 | 557.286 | 371.86  | 766  | 18.1  | YDR226W | 9  |
| GVAINFVTNEDVGAMR                    | 0.006 | 1.24E+05 | 846.922 | 564.951 | 3674 | 62.2  | YJL138C | 13 |
| GVETLAEAVAATLGPVK                   | 0.010 | 5.28E+05 | 763.925 | 509.619 | 5558 | 90.8  | YLR259C | 18 |
| GVFQGVHDSAEEK                       | 0.000 | 4.40E+05 | 637.312 | 425.211 | 962  | 21.8  | YFL014W | 11 |
| GVGVFGNNAQDSGISPSVWR                | 0.016 | 3.40E+04 | 1024    | 683.005 | 2646 | 68.2  | YGR264C | 8  |
| GVLGYTEDAVVSSDFLGDSSHIFDASAGIQLSPK  | 0.018 | 3.51E+04 | 1785.37 | 1190.58 | 5972 | 151.8 | YGR192C | 11 |
| GVLGYTEDAVVSSDFLGDSSIFDAAAGIQLSPK   | 0.018 | 2.80E+04 | 1765.86 | 1177.58 | 4642 | 118.2 | YJR009C | 7  |
| GVLGYTEDAVVSSDFLGDTHASIFDASAGIQLSPK | 0.018 | 3.51E+04 | 1784.38 | 1189.92 | 5972 | 151.8 | YJL052W | 11 |
| GVLLAADLGGTHFR                      | 0.016 | 2.09E+05 | 713.894 | 476.265 | 3888 | 65.1  | YDR516C | 10 |
| GVLLAADLGGTNFR                      | 0.010 | 5.16E+05 | 702.386 | 468.593 | 3883 | 65.1  | YCL040W | 16 |
| GVMNAVNNVNNVIAAAFVK                 | 0.000 | 1.41E+06 | 973.02  | 649.016 | 5515 | 89.9  | YHR174W | 21 |
| GVNLPGTDVLDLPALSEK                  | 0.000 | 3.58E+06 | 862.957 | 575.64  | 4184 | 69.1  | YAL038W | 22 |
| GVPQIEVTFDVSNGILNVSAVEK             | 0.000 | 3.89E+04 | 1265.66 | 844.106 | 5863 | 149.5 | YAL005C | 6  |
| GVVDESLPLNLSR                       | 0.000 | 2.78E+06 | 757.396 | 505.267 | 3513 | 59.9  | YMR186W | 16 |
| GVVIEGYPTIVLYPGGK                   | 0.006 | 2.28E+05 | 881.493 | 587.998 | 4529 | 74    | YCL043C | 13 |
| GWLSEGGTLIGTAR                      | 0.010 | 7.00E+05 | 709.375 | 473.253 | 3848 | 64.6  | YGR240C | 16 |
| GYDAGESIYQAPPADR                    | 0.006 | 1.22E+05 | 862.879 | 575.589 | 1159 | 25.2  | YLR304C | 11 |
| GYPKVAVVPAR                         | 0.022 | 7.48E+05 | 529.311 | 353.21  | 861  | 19.9  | YLR044C | 8  |
| GYLADDIDADSLEDIYSAHEAIR             | 0.000 | 1.24E+06 | 1327.12 | 885.08  | 5094 | 82.4  | YPL131W | 19 |
| GYLVAMTGDGVNDAPSLK                  | 0.007 | 3.18E+04 | 904.448 | 603.301 | 3425 | 58.7  | YGL008C | 11 |
| GYPIQFLTIGAGVPSLEVASEYIETLGLK       | 0.028 | 2.55E+04 | 1533.33 | 1022.55 | 4916 | 125.2 | YKL182W | 10 |
| GYQFAAALEGALK                       | 0.030 | 6.61E+04 | 669.856 | 446.907 | 4607 | 75.1  | YKL104C | 9  |
| GYWGTNLGQPHSLATK                    | 0.034 | 2.64E+05 | 865.436 | 577.293 | 2481 | 44.9  | YGL123W | 8  |
| HCGWLALMAGIATGADYIFIPER             | 0.006 | 1.62E+05 | 1253.12 | 835.752 | 4149 | 68.6  | YGR240C | 11 |
| HELSSLADVINDAFGTAHR                 | 0.000 | 1.46E+06 | 1108.54 | 739.363 | 4318 | 70.9  | YCR012W | 19 |
| HGIPLISIEELAQYLK                    | 0.045 | 3.25E+04 | 912.517 | 608.68  | 5927 | 98    | YDR487C | 9  |
| HGYIGEFYIDDHR                       | 0.022 | 7.05E+05 | 875.895 | 584.266 | 2666 | 47.5  | YJL190C | 11 |
| HIDASGSINR                          | 0.000 | 9.24E+05 | 535.273 | 357.184 | 571  | 14.2  | YNL302C | 9  |
| HITINDLPVGR                         | 0.000 | 8.76E+05 | 617.849 | 412.235 | 2272 | 41.8  | YML028W | 9  |
| HLEDNTLLISGPFK                      | 0.026 | 5.84E+05 | 792.425 | 528.619 | 3536 | 60.2  | YML073C | 10 |
| HLEDNTLLVTGPFK                      | 0.026 | 5.98E+05 | 792.425 | 528.619 | 3306 | 57.1  | YLR448W | 8  |
| HLEGISDADIAK                        | 0.000 | 3.74E+06 | 634.828 | 423.554 | 1492 | 30.5  | YKL152C | 15 |
| HLGSLFSDAVQTASVQWFER                | 0.032 | 1.25E+05 | 1139.57 | 760.047 | 5483 | 89.3  | YLR359W | 12 |
| HLNICGTVGSIDNDMSTTDATIGAYSALDR      | 0.016 | 5.27E+04 | 1556.22 | 1037.82 | 3026 | 77.8  | YMR205C | 8  |
| HNLEFINILTDDGLLNEECGPEWQGMK         | 0.016 | 2.92E+04 | 1558.23 | 1039.15 | 3746 | 95.7  | YGR094W | 9  |
| HQEELWSFIADSLK                      | 0.020 | 4.00E+04 | 851.925 | 568.286 | 5474 | 89.2  | YFR053C | 12 |
| HSEFVAYPIQLLVTK                     | 0.006 | 9.58E+04 | 872.985 | 582.326 | 4704 | 76.4  | YMR186W | 10 |
| HSEFVAYPIQLLVTK                     | 0.000 | 9.71E+05 | 865.977 | 577.654 | 4701 | 76.4  | YPL240C | 8  |
| HSGNIQLDEIIEIAR                     | 0.006 | 8.18E+04 | 854.455 | 569.972 | 4259 | 70.1  | YDR418W | 12 |
| HSTTAIQGSISDSATTTTPR                | 0.014 | 1.51E+05 | 965.977 | 644.32  | 2672 | 47.6  | YBL101C | 9  |
| HTLDIINVLTQDNPIQVVDVAITNTGPR        | 0.000 | 1.61E+05 | 1528.82 | 1019.55 | 4996 | 127.2 | YJR123W | 16 |
| HVEITDDEIAK                         | 0.007 | 2.45E+05 | 635.32  | 423.882 | 1187 | 25.7  | YLR359W | 11 |
| HVLTILTDMSSYADALR                   | 0.020 | 1.42E+05 | 953.491 | 635.996 | 5227 | 84.7  | YBR127C | 12 |
| HVSPAGAAVGIPLSDVEK                  | 0.026 | 5.99E+05 | 873.973 | 582.984 | 2661 | 47.5  | YMR120C | 12 |
| HVVFGVVDGYDIVK                      | 0.000 | 1.05E+06 | 838.438 | 559.295 | 3609 | 61.2  | YDR155C | 20 |
| IAAQTLEEDE                          | 0.000 | 8.14E+05 | 559.764 | 373.512 | 1701 | 33.6  | YNL302C | 10 |
| IADQATENVADISNLK                    | 0.020 | 6.10E+04 | 851.436 | 567.96  | 2694 | 48    | YER070W | 11 |

|                                   |       |          |         |         |      |       |           |    |
|-----------------------------------|-------|----------|---------|---------|------|-------|-----------|----|
| IAEFPEEGIDPSTYLNN                 | 0.000 | 1.92E+05 | 954.947 | 636.967 | 4650 | 75.7  | YDL084W   | 13 |
| IAEGSDPSLLDQR                     | 0.010 | 4.51E+05 | 757.396 | 505.267 | 2873 | 50.7  | YHR019C   | 12 |
| IAILAAISAMVDAAK                   | 0.032 | 9.73E+04 | 729.423 | 486.618 | 6553 | 111.7 | YLR249W   | 19 |
| IALSRPNVEVVALNDPFIENDYAAVMFK      | 0.000 | 1.75E+05 | 1586.31 | 1057.88 | 3491 | 89.4  | YGR192C   | 9  |
| IASTWEGIQAAK                      | 0.007 | 1.80E+05 | 637.841 | 425.563 | 2282 | 42    | YLR354C   | 9  |
| IDGALILAYAELNK                    | 0.032 | 9.11E+04 | 752.424 | 501.952 | 5108 | 82.7  | YGL206C   | 11 |
| IDGYSGPELGELMEK                   | 0.006 | 1.65E+05 | 819.39  | 546.596 | 3914 | 65.5  | YBR121C   | 11 |
| IDIDVLAPLSSFAATAHK                | 0.007 | 1.67E+05 | 935.009 | 623.675 | 5327 | 86.5  | YLR359W   | 13 |
| IDNLAAVFDAR                       | 0.000 | 8.52E+05 | 602.82  | 402.216 | 3887 | 65.1  | YKL081W   | 9  |
| IDTVVLDALQLLK                     | 0.032 | 9.47E+04 | 720.937 | 480.961 | 6088 | 101.1 | YNL138W   | 13 |
| IDVAVDSTGVFK                      | 0.000 | 3.51E+06 | 625.835 | 417.559 | 2972 | 52.1  | YJL052W   | 13 |
| IEAALSDALAAALQIEDPSADELR          | 0.000 | 9.49E+05 | 1206.12 | 804.415 | 5839 | 96.2  | YDL229W   | 14 |
| IEALEFADDAAK                      | 0.000 | 5.00E+05 | 646.822 | 431.55  | 3027 | 52.9  | YPL160W   | 9  |
| IEDDPFENLETDDDIFQK                | 0.021 | 1.47E+05 | 1091.99 | 728.327 | 5038 | 81.5  | YFR053C   | 14 |
| IEDVIDELIPK                       | 0.030 | 6.80E+04 | 642.358 | 428.575 | 4952 | 80.1  | YER007C-A | 9  |
| IEDVTPVPSDSTR                     | 0.000 | 2.08E+06 | 708.354 | 472.572 | 1378 | 28.7  | YCR031C   | 15 |
| IEEDPFENLETDLDFQNEFGINTTVQER      | 0.000 | 1.74E+05 | 1729.28 | 1153.19 | 3882 | 99    | YGL253W   | 14 |
| IEEVIDLILR                        | 0.007 | 3.08E+05 | 606.864 | 404.911 | 5287 | 85.7  | YHR087W   | 12 |
| IEGVATPQDAQFYLGK                  | 0.000 | 1.70E+06 | 868.946 | 579.633 | 3434 | 58.8  | YPL143W   | 17 |
| IEGVATPQEAQFYLGK                  | 0.000 | 5.31E+05 | 875.954 | 584.305 | 3504 | 59.8  | YOR234C   | 11 |
| IEIDSFVDGIDLSETLTR                | 0.016 | 3.67E+04 | 1012.02 | 675.013 | 3631 | 92.9  | YJL034W   | 8  |
| IENQQGVNNFDEILK                   | 0.000 | 3.94E+06 | 880.944 | 587.632 | 3394 | 58.3  | YAL038W   | 16 |
| IEQELGTEIAAIPATIDK                | 0.000 | 9.08E+04 | 956.517 | 638.014 | 4345 | 71.3  | YDL160C   | 10 |
| IETGNFSWASEGISK                   | 0.000 | 1.70E+06 | 813.394 | 542.598 | 3324 | 57.3  | YBL072C   | 20 |
| IEVLEQELVR                        | 0.007 | 2.41E+05 | 614.351 | 409.903 | 3162 | 54.9  | YGR086C   | 9  |
| IEVSSQESWGN                       | 0.000 | 4.66E+05 | 618.281 | 412.523 | 2147 | 40.1  | YBR072W   | 11 |
| IFVLAEEENLPSLGYK                  | 0.006 | 1.33E+05 | 846.964 | 564.978 | 4764 | 77.3  | YGR185C   | 13 |
| IGAHHDIINGDSTFK                   | 0.006 | 8.93E+04 | 801.892 | 534.93  | 2004 | 38    | YCR092C   | 10 |
| IGDIQIFER                         | 0.026 | 4.17E+05 | 545.798 | 364.201 | 3111 | 54.2  | YGL245W   | 8  |
| IGGIGTPVGR                        | 0.000 | 1.87E+07 | 513.309 | 342.542 | 1951 | 37.2  | YBR118W   | 12 |
| IGLLKPSELDD                       | 0.020 | 1.13E+05 | 628.84  | 419.563 | 2812 | 49.8  | YGR218W   | 11 |
| IGPDVVIGPNVTIGDGVR                | 0.006 | 1.33E+05 | 889.494 | 593.332 | 3884 | 65.1  | YDL055C   | 10 |
| IGSEVYHNLK                        | 0.022 | 7.41E+05 | 580.309 | 387.208 | 1056 | 23.4  | YGR254W   | 8  |
| IGTINEEDILANQPLLSIQDR             | 0.000 | 4.52E+04 | 1297.2  | 865.133 | 3223 | 82.7  | YKR048C   | 8  |
| IGTQEDIFPFLGGAGPYFSFPGDYGISR      | 0.016 | 5.94E+04 | 1504.73 | 1003.49 | 4251 | 108.2 | YBR092C   | 8  |
| IGVADAINELLEPIR                   | 0.047 | 2.26E+04 | 811.959 | 541.642 | 6109 | 101.5 | YGR185C   | 11 |
| IHLEGSEAPQEPK                     | 0.032 | 7.30E+04 | 717.865 | 478.912 | 1018 | 22.7  | YGL245W   | 10 |
| IHQYLFQEGVVVAK                    | 0.020 | 4.96E+04 | 815.951 | 544.303 | 2874 | 50.7  | YMR230W   | 10 |
| IIAAIPNPEDVVAISSR                 | 0.000 | 1.50E+06 | 882.996 | 589     | 4034 | 67    | YGR214W   | 14 |
| IIDDDVPTILQGAK                    | 0.010 | 7.30E+05 | 749.412 | 499.943 | 3563 | 60.6  | YLL026W   | 12 |
| IIDFGLSNIYDSR                     | 0.021 | 1.67E+05 | 756.888 | 504.928 | 4588 | 74.8  | YDR122W   | 10 |
| IIILQGLNETSTNAYR                  | 0.000 | 7.18E+04 | 968.013 | 645.678 | 4395 | 72    | YKL080W   | 16 |
| IIFGTQSDAFQEDR                    | 0.006 | 7.79E+04 | 813.892 | 542.93  | 3049 | 53.2  | YLR027C   | 10 |
| IGIATTFDLDFLK                     | 0.016 | 2.17E+05 | 783.943 | 522.964 | 5468 | 89.1  | YER062C   | 10 |
| IINEPTAAAIAYGLDK                  | 0.000 | 1.28E+06 | 830.451 | 553.97  | 3809 | 64.1  | YAL005C   | 16 |
| IINEPTAAAIAYGLGAGK                | 0.000 | 2.35E+06 | 865.478 | 577.321 | 4129 | 68.3  | YDL229W   | 21 |
| IINSSEIQSAIRPAGQATQK              | 0.016 | 2.12E+05 | 1056.57 | 704.718 | 2423 | 44.1  | YBR031W   | 18 |
| IIVDAYGGASSVGGGAFSGK              | 0.000 | 2.30E+05 | 906.96  | 604.976 | 3035 | 53    | YDR502C   | 23 |
| IIVHTDTEPLINAFLK                  | 0.007 | 3.22E+05 | 948.035 | 632.359 | 4152 | 68.6  | YGR234W   | 10 |
| IIVYDDGVLSFQVLEVVDDK              | 0.000 | 3.15E+05 | 1133.6  | 756.067 | 5857 | 149.4 | YAL038W   | 15 |
| ILATLQGLEAVNAVLESTPDTSPSPLIAVNENK | 0.000 | 8.18E+04 | 1659.4  | 1106.6  | 4102 | 104.5 | YMR205C   | 14 |
| ILDSALVTAALQAK                    | 0.010 | 4.99E+05 | 707.419 | 471.949 | 4043 | 67.1  | YLL026W   | 16 |
| ILEDLVFPTIVGK                     | 0.000 | 9.83E+05 | 786.948 | 524.968 | 5128 | 83    | YOR096W   | 11 |
| ILEQFEYVLYPSK                     | 0.006 | 1.58E+05 | 814.932 | 543.624 | 4709 | 76.5  | YPL231W   | 12 |
| ILGYDPLASALLQVQIPATPTSLETAK       | 0.000 | 1.53E+05 | 1454.31 | 969.874 | 5695 | 93.4  | YBR249C   | 13 |
| ILLPFLEQSLSQGIQDQAVYNALAK         | 0.007 | 4.25E+04 | 1380.25 | 920.504 | 6300 | 105.8 | YGL206C   | 10 |
| ILNHMIETGAEYIMELTDK               | 0.016 | 2.01E+05 | 1111.05 | 741.034 | 5838 | 96.2  | YKL035W   | 17 |

|                                |       |          |         |         |      |       |         |    |
|--------------------------------|-------|----------|---------|---------|------|-------|---------|----|
| ILPEPTEGFAADDEPTTPAELVGK       | 0.006 | 9.33E+04 | 1249.12 | 833.083 | 4109 | 68    | YKL182W | 10 |
| ILSQAPSELELQVAK                | 0.000 | 8.15E+05 | 813.459 | 542.642 | 3174 | 55.1  | YNL096C | 18 |
| ILSQAPTELELQVAQAFVELENSSPK     | 0.000 | 4.57E+05 | 1542.31 | 1028.54 | 4546 | 115.7 | YOR096W | 15 |
| ILYEALDANSDFYNVVPDPK           | 0.018 | 1.90E+04 | 1142.06 | 761.711 | 2877 | 74.1  | YOR184W | 9  |
| INAGLYILNPEVIDLIEMKPTSIEK      | 0.000 | 8.56E+04 | 1407.27 | 938.517 | 6075 | 100.8 | YDL055C | 12 |
| INEEESIASGDSLVLQEK             | 0.000 | 9.29E+04 | 1037.53 | 692.023 | 2921 | 75.2  | YOR198C | 9  |
| INELLSLEGK                     | 0.007 | 3.12E+05 | 601.835 | 401.559 | 3527 | 60.1  | YDR382W | 9  |
| INELTLVQK                      | 0.000 | 2.27E+06 | 585.858 | 390.908 | 3576 | 60.8  | YNL178W | 12 |
| IPDDLDDENVTSDDLFGFLAR          | 0.020 | 5.40E+04 | 1240.6  | 827.399 | 6219 | 103.9 | YCL040W | 10 |
| IPEIPLVVSTDLSEIQK              | 0.000 | 1.47E+06 | 941.033 | 627.691 | 5420 | 88.2  | YBR031W | 20 |
| IPNFESGLLHIFEAGLLYQSLGYK       | 0.000 | 1.19E+05 | 1411.76 | 941.509 | 3470 | 59.3  | YNL126W | 10 |
| IQEPVFLVEIQCEQAVGGIYSVLNK      | 0.000 | 7.18E+05 | 1437.26 | 958.509 | 6300 | 105.8 | YDR385W | 18 |
| IQJVGADPFGSILAQPENLNK          | 0.000 | 4.86E+04 | 1112.6  | 742.071 | 3302 | 84.7  | YGR155W | 10 |
| ISDDILSVLDSHLIPSATTGESK        | 0.000 | 1.18E+06 | 1199.62 | 800.083 | 5419 | 88.2  | YDR099W | 18 |
| ISGVEVESPTSPVQSLIPKPLESVK      | 0.000 | 8.33E+04 | 1384.26 | 923.176 | 5090 | 82.4  | YJR139C | 10 |
| ISHVSTGGGASLELLEGGK            | 0.006 | 8.50E+04 | 877.968 | 585.648 | 2719 | 48.4  | YCR012W | 11 |
| ITDEEASYK                      | 0.000 | 1.18E+06 | 528.248 | 352.501 | 701  | 16.8  | YHR203C | 8  |
| ITEKPELINDILLECGFPNTSGQKPNEYNY | 0.018 | 2.59E+04 | 1720.34 | 1147.23 | 3262 | 83.7  | YCL050C | 9  |
| ITTIEEILHSLPVK                 | 0.006 | 1.60E+05 | 870.501 | 580.67  | 5449 | 88.7  | YGL123W | 11 |
| IVAVTGTAEFAEQR                 | 0.032 | 7.97E+04 | 746.394 | 497.932 | 2428 | 44.1  | YOR335C | 10 |
| IVDLQSQSEFASLFLK               | 0.000 | 4.75E+05 | 962.009 | 641.675 | 5615 | 91.8  | YKL081W | 19 |
| IVDMVSYGIWEPEVIK               | 0.007 | 3.94E+04 | 939.49  | 626.662 | 5125 | 83    | YJL014W | 10 |
| IVDTNGAGDAFAGGFMAGLTK          | 0.000 | 8.10E+04 | 1006.99 | 671.663 | 3111 | 79.9  | YJR105W | 11 |
| IVEQLADYLIGVQY                 | 0.000 | 2.13E+06 | 812.435 | 541.959 | 5839 | 96.2  | YOR122C | 18 |
| IVFELYNDIVPK                   | 0.032 | 9.86E+04 | 725.403 | 483.938 | 4878 | 79    | YLR216C | 10 |
| IVGIATTFDLDFLK                 | 0.016 | 2.03E+05 | 776.935 | 518.292 | 5463 | 89    | YIL053W | 11 |
| IVGIVSGELNNAAK                 | 0.016 | 2.04E+05 | 728.412 | 485.944 | 2588 | 46.4  | YDR023W | 11 |
| IVNDVTAAGVSYGIFK               | 0.043 | 2.58E+04 | 827.446 | 551.966 | 4159 | 68.7  | YPL106C | 10 |
| IVNEEFQLEEDTPVYK               | 0.016 | 3.66E+04 | 1034.49 | 689.997 | 2541 | 65.5  | YLR200W | 10 |
| IVNEPTAAAIAYGLDK               | 0.000 | 1.22E+06 | 823.443 | 549.298 | 3809 | 64.1  | YJL034W | 13 |
| IVPAEDGSGAGAAVIAALAQK          | 0.000 | 3.67E+05 | 955.023 | 637.018 | 4430 | 72.5  | YGL253W | 24 |
| IVSTEGNVPQTLAPVPYETFI          | 0.021 | 1.57E+05 | 1138.1  | 759.067 | 5533 | 90.3  | YBR191W | 11 |
| IVTEAVEIEQR                    | 0.007 | 4.20E+05 | 643.851 | 429.57  | 1852 | 35.8  | YJL026W | 9  |
| IVVEYIAAIGADLIDER              | 0.000 | 8.25E+04 | 930.509 | 620.675 | 6275 | 105.2 | YLR249W | 14 |
| IWCFGPDGNGPNLVIDQTK            | 0.016 | 5.58E+04 | 1037.51 | 692.007 | 2936 | 75.6  | YDR385W | 9  |
| IYASFNDTFVHVTDLSGK             | 0.007 | 2.18E+05 | 1007.5  | 672.002 | 3757 | 63.3  | YCR031C | 9  |
| IYPTYDFCVPIVDAIEGVTHALR        | 0.020 | 5.75E+04 | 1296.66 | 864.777 | 6669 | 114.5 | YGL245W | 10 |
| IYTISETPALPILLEDASR            | 0.021 | 1.39E+05 | 1116.09 | 744.398 | 5683 | 93.1  | YLL018C | 11 |
| LAFYQVTPEEEDDEE                | 0.000 | 1.24E+06 | 1036.43 | 691.288 | 2506 | 64.6  | YLR061W | 15 |
| LALTTAEYLAYQTER                | 0.006 | 2.28E+05 | 871.952 | 581.637 | 2964 | 52    | YBR127C | 11 |
| LATGANIVGNALIDPTAK             | 0.006 | 2.85E+05 | 869.989 | 580.328 | 3604 | 61.2  | YDL055C | 12 |
| LDDATEDVFNK                    | 0.007 | 2.49E+05 | 633.796 | 422.866 | 2007 | 38    | YGL245W | 10 |
| LDEVVITK                       | 0.026 | 3.63E+05 | 508.305 | 339.206 | 2146 | 40    | YER091C | 8  |
| LDGLSVQELMDSK                  | 0.016 | 1.98E+05 | 717.861 | 478.91  | 4093 | 67.8  | YLR432W | 10 |
| LDLFPEDLNILGK                  | 0.010 | 2.93E+05 | 743.911 | 496.277 | 5528 | 90.2  | YNL220W | 13 |
| LDPNISNNGIFYTGK                | 0.020 | 3.90E+04 | 883.46  | 589.309 | 5914 | 97.7  | YLR260W | 10 |
| LDQLIYVPLDENAR                 | 0.006 | 3.71E+05 | 878.467 | 585.981 | 4434 | 72.6  | YDL126C | 12 |
| LDQVWGSETVASSK                 | 0.000 | 1.89E+06 | 753.875 | 502.919 | 2243 | 41.4  | YBR031W | 15 |
| LDVDEVSVAQK                    | 0.007 | 2.79E+05 | 659.33  | 439.889 | 2137 | 39.9  | YGR209C | 11 |
| LEAEEIPSEDQNEFULLER            | 0.016 | 4.05E+04 | 1081.02 | 721.015 | 4291 | 109.2 | YPL231W | 8  |
| LEDLSPSTHNMEVPVVK              | 0.007 | 1.68E+05 | 947.983 | 632.324 | 2422 | 44.1  | YEL034W | 9  |
| LEDPSGQQPIWGR                  | 0.032 | 1.21E+05 | 741.87  | 494.916 | 2478 | 44.9  | YAL035W | 11 |
| LESYVASIEQTVDPVLSSK            | 0.000 | 2.31E+05 | 1083.56 | 722.711 | 3216 | 82.5  | YDL229W | 11 |
| LEVGTETLIDK                    | 0.007 | 2.88E+05 | 609.335 | 406.559 | 2542 | 45.8  | YML126C | 9  |
| LEVPGYVDIVK                    | 0.000 | 1.87E+06 | 616.35  | 411.236 | 3707 | 62.6  | YNL302C | 11 |
| LFPTGGPFGGNDVTTIFGK            | 0.007 | 4.04E+04 | 962.994 | 642.332 | 3975 | 66.3  | YGR270W | 10 |
| LGDTLYEEFGISK                  | 0.021 | 1.73E+05 | 736.369 | 491.249 | 4088 | 67.7  | YGL202W | 10 |

|                                        |       |          |         |         |      |       |           |    |
|----------------------------------------|-------|----------|---------|---------|------|-------|-----------|----|
| LGEMPADQGFAYLGA                        | 0.006 | 1.54E+05 | 882.935 | 588.959 | 3849 | 64.6  | YDL185W   | 11 |
| LGFTFSYPVDQTSLSGLIR                    | 0.018 | 3.08E+04 | 1158.6  | 772.734 | 3287 | 84.3  | YCL040W   | 7  |
| LGGEVFDFTK                             | 0.000 | 3.42E+06 | 613.327 | 409.22  | 4062 | 67.4  | YMR083W   | 12 |
| LGGIPLGVIGVETR                         | 0.007 | 2.11E+05 | 690.914 | 460.945 | 3692 | 62.4  | YNR016C   | 9  |
| LGSADLVEEIDSDGSK                       | 0.006 | 9.62E+04 | 817.891 | 545.597 | 3389 | 58.2  | YDL143W   | 10 |
| LGLVQDSDGYVGGPLK                       | 0.006 | 9.17E+04 | 823.941 | 549.63  | 3124 | 54.4  | YKR048C   | 13 |
| LGYSVYEDAQYIGHAFK                      | 0.007 | 1.74E+05 | 980.976 | 654.32  | 4382 | 71.8  | YNR034W-A | 11 |
| LHDIPDEFDAMPPIAK                       | 0.007 | 1.79E+05 | 963.488 | 642.661 | 4552 | 74.3  | YDL125C   | 10 |
| LIDLTPQFAFVTPMGK                       | 0.000 | 1.20E+07 | 889.481 | 593.323 | 5234 | 84.8  | YLR044C   | 12 |
| LIEAFNEIAEDSEQFEK                      | 0.000 | 2.47E+05 | 1006.48 | 671.321 | 3126 | 80.3  | YPL240C   | 13 |
| LIEFGFTDEMIAMPISALSGGWK                | 0.006 | 9.45E+04 | 1257.13 | 838.42  | 6679 | 114.7 | YLR249W   | 11 |
| LIEPYVAYGYPSYSTIR                      | 0.000 | 1.64E+06 | 996.509 | 664.675 | 3605 | 61.2  | YGL076C   | 10 |
| LISSNLEMEIIPNQK                        | 0.000 | 1.92E+05 | 929.485 | 619.992 | 3730 | 63    | YKL035W   | 12 |
| LISDYDADELAELQPVIVNTPHLK               | 0.000 | 2.12E+05 | 1382.72 | 922.152 | 5525 | 90.1  | YHR064C   | 16 |
| LLDAVDEVIPTPER                         | 0.006 | 2.26E+05 | 815.92  | 544.282 | 3994 | 66.5  | YOR187W   | 11 |
| LLEPAYDGASVEQQ                         | 0.016 | 1.82E+05 | 760.367 | 507.247 | 2588 | 46.4  | YHR025W   | 11 |
| LLGAQHLEIAGVDALIVCGGDGSLTGADLFR        | 0.016 | 3.98E+04 | 1541.31 | 1027.87 | 4171 | 106.2 | YMR205C   | 9  |
| LLPWFDGMLEADEAYFK                      | 0.016 | 4.43E+04 | 1022.99 | 682.329 | 4361 | 111   | YKL060C   | 9  |
| LLQENDTLVK                             | 0.007 | 1.90E+05 | 637.354 | 425.238 | 1812 | 35.2  | YKL182W   | 10 |
| LLQLAGVEDVYQTSNGK                      | 0.000 | 9.80E+04 | 917.981 | 612.323 | 3790 | 63.8  | YGL123W   | 10 |
| LTLTNAANVPVENIWADIFAK                  | 0.006 | 3.40E+05 | 1207.16 | 805.109 | 6539 | 111.3 | YDL081C   | 16 |
| LLYETALLTSGFSLDEPTSFASR                | 0.000 | 4.58E+04 | 1259.64 | 840.095 | 3673 | 93.9  | YPL240C   | 9  |
| LNDAVEYVSGR                            | 0.000 | 2.10E+06 | 611.807 | 408.207 | 1857 | 35.9  | YFL014W   | 11 |
| LNDIEDVEK                              | 0.026 | 3.41E+05 | 537.769 | 358.849 | 1321 | 27.8  | YBR011C   | 8  |
| LNIGIVHVGAPSAALNAATR                   | 0.007 | 2.13E+05 | 973.053 | 649.037 | 3732 | 63    | YGR240C   | 10 |
| LNILTQEDNTVMVQIAENNTTK                 | 0.006 | 1.81E+05 | 1288.65 | 859.434 | 3804 | 64    | YDR484W   | 10 |
| LNNVFIGEQGKPYISLPK                     | 0.010 | 3.05E+05 | 1058.59 | 706.065 | 4213 | 69.5  | YHR203C   | 14 |
| LNNVSLSDAFFPPDNVYR                     | 0.000 | 7.94E+04 | 1151.56 | 768.043 | 3492 | 89.4  | YLR028C   | 7  |
| LNPEYTIASYSDNAAVLSENDAFFFAPNSTTK       | 0.000 | 1.99E+04 | 1806.84 | 1204.89 | 3543 | 90.7  | YGR061C   | 7  |
| LNYNVTVSGVNGPLVILEK                    | 0.007 | 5.11E+04 | 965.536 | 644.026 | 4535 | 74    | YBR127C   | 11 |
| LPLSVINVSAQR                           | 0.000 | 1.47E+06 | 648.885 | 432.926 | 3197 | 55.5  | YDR447C   | 11 |
| LPLVGGHEGAGVVVMGENVK                   | 0.000 | 1.80E+06 | 1010.04 | 673.695 | 3152 | 54.8  | YMR303C   | 14 |
| LPTESVPEPK                             | 0.026 | 6.80E+05 | 548.798 | 366.201 | 1386 | 28.8  | YMR242C   | 10 |
| LQDVLDFGFIK                            | 0.007 | 1.78E+05 | 631.343 | 421.231 | 4047 | 67.2  | YPR041W   | 9  |
| LSAEVDFVEIIGGTR                        | 0.000 | 2.97E+05 | 918.473 | 612.651 | 5260 | 85.3  | YPL106C   | 17 |
| LSEVVELFVFTPDGR                        | 0.000 | 6.96E+04 | 983.002 | 655.67  | 6095 | 101.2 | YHR087W   | 11 |
| LSNASNSPGMLANSSTATSASANER              | 0.020 | 5.36E+04 | 1219.56 | 813.379 | 1499 | 30.6  | YDR472W   | 10 |
| LSQSLETDSQLNLR                         | 0.006 | 3.72E+05 | 858.96  | 572.976 | 3409 | 58.5  | YGL245W   | 13 |
| LSQVNCNTVFGPLGDFNLSLLDK                | 0.000 | 4.23E+06 | 1247.64 | 832.093 | 5784 | 95.1  | YLR134W   | 11 |
| LSQYVQEMALGGPITK                       | 0.006 | 1.58E+05 | 867.958 | 578.975 | 2979 | 52.2  | YPL231W   | 12 |
| LSSSVIEQIVK                            | 0.000 | 1.62E+06 | 666.374 | 444.585 | 3967 | 66.2  | YDR064W   | 13 |
| LSVDSMTTLLEVENPTQLR                    | 0.018 | 3.25E+04 | 1131.07 | 754.383 | 3277 | 84    | YNR016C   | 7  |
| LTADYDALDIANR                          | 0.000 | 8.67E+05 | 725.862 | 484.244 | 3113 | 54.2  | YOL127W   | 13 |
| LTDDSPPIPEQPPIK                        | 0.000 | 9.66E+04 | 948.983 | 632.991 | 3055 | 53.3  | YER090W   | 10 |
| LTVNSLSDAFFPPDNVYR                     | 0.000 | 8.70E+04 | 1145.06 | 763.711 | 3492 | 89.4  | YMR120C   | 8  |
| LTSLVVAGSDLR                           | 0.000 | 2.51E+06 | 672.878 | 448.921 | 2217 | 41    | YAL038W   | 10 |
| LTTNLEYTLPEVVEILGPQNK                  | 0.000 | 1.00E+05 | 1180.12 | 787.085 | 3107 | 79.8  | YHR064C   | 8  |
| LVADGVFYAELNEFFTR                      | 0.030 | 7.76E+04 | 995.999 | 664.335 | 6292 | 105.6 | YNL178W   | 13 |
| LVEDPQVIAPFLGK                         | 0.000 | 2.28E+06 | 763.435 | 509.292 | 4453 | 72.9  | YLR249W   | 16 |
| LVTDSLQQPEVLGEGVDVNEGLIK               | 0.000 | 6.61E+04 | 1355.21 | 903.811 | 4750 | 77.1  | YKL210W   | 14 |
| LWDVATGETYQR                           | 0.000 | 1.98E+06 | 719.852 | 480.237 | 2678 | 47.7  | YMR116C   | 14 |
| LWTEFNEDAEPVTTDAILATGASAK              | 0.000 | 1.69E+05 | 1382.19 | 921.796 | 5605 | 91.6  | YDR353W   | 13 |
| LYGTTDNTQEVAVTNK                       | 0.007 | 2.73E+04 | 948.945 | 632.966 | 2020 | 38.2  | YJR014W   | 10 |
| LYQAGGAPGAAGGAPGGFPGGAPAPEAEGPTVEEVD   | 0.000 | 2.51E+05 | 1688.29 | 1125.86 | 2457 | 63.4  | YAL005C   | 14 |
| MAEGVFQGAIGIDLGTYSVCVATYESSVEIIANEQGNR | 0.000 | 4.82E+04 | 1997.45 | 1331.97 | 5099 | 129.9 | YDL229W   | 8  |
| MATLEELDAQTLPGDDELQEIILNLSLQELQTR      | 0.000 | 4.28E+04 | 1865.4  | 1243.94 | 4388 | 111.7 | YOR117W   | 7  |

|                                |       |          |         |         |      |       |         |    |
|--------------------------------|-------|----------|---------|---------|------|-------|---------|----|
| MFILDEADEMLSSGFK               | 0.000 | 1.30E+05 | 916.926 | 611.62  | 6075 | 100.8 | YJL138C | 15 |
| MGTTGVQSSVASDLDELISR           | 0.016 | 6.10E+04 | 1033.51 | 689.341 | 3341 | 85.6  | YGL026C | 8  |
| MIEIMLPVFDAPQNLVEQAK           | 0.000 | 2.34E+06 | 1143.6  | 762.734 | 5163 | 83.6  | YLR044C | 10 |
| MIPGAKPLQVGDVVSTTAVIESVNNQPTGK | 0.028 | 2.79E+04 | 1518.33 | 1012.55 | 3316 | 85    | YKL182W | 8  |
| MPELIPVLSESMWDTK               | 0.030 | 7.42E+04 | 938.465 | 625.979 | 5872 | 96.9  | YNL014W | 9  |
| MPELIPVLSETMWDTK               | 0.025 | 9.84E+04 | 945.473 | 630.651 | 5872 | 96.9  | YLR249W | 13 |
| MSANISSETTAMITDIANAPAEIDR      | 0.000 | 8.86E+05 | 1268.11 | 845.74  | 5589 | 91.3  | YLR134W | 12 |
| MSANISSETTAMITDIATAPAEIDR      | 0.000 | 1.80E+06 | 1261.61 | 841.409 | 4649 | 75.7  | YLR044C | 10 |
| MSLPATFDLTPEDAQLLLAANTHLGAR    | 0.000 | 5.92E+05 | 1433.74 | 956.164 | 6035 | 100   | YGR214W | 11 |
| MSNPFDLLGNDVEDADVVLPPK         | 0.000 | 2.07E+04 | 1242.62 | 828.749 | 4078 | 103.9 | YLR150W | 6  |
| MSPEQALLSLHADYIGGDTANYK        | 0.000 | 3.66E+04 | 1247.6  | 832.069 | 3413 | 87.4  | YGR032W | 6  |
| MSQVYFDVEADGQPIGR              | 0.000 | 2.13E+06 | 956.449 | 637.968 | 4215 | 69.5  | YLR155C | 11 |
| MSTATTTVTTSQDASHPTK            | 0.000 | 1.03E+05 | 982.965 | 655.646 | 815  | 19    | YLR244C | 11 |
| MSTFNAETADNLEDIEK              | 0.000 | 9.32E+04 | 964.433 | 643.291 | 3805 | 64    | YPL225W | 10 |
| NAAWLVFANK                     | 0.026 | 5.93E+05 | 567.309 | 378.542 | 3956 | 66    | YDL192W | 11 |
| NAESLVDIENEIVR                 | 0.000 | 1.13E+05 | 900.971 | 600.983 | 5050 | 81.7  | YDR148C | 15 |
| NAFEGVLDWLK                    | 0.007 | 2.11E+05 | 646.338 | 431.228 | 5747 | 94.4  | YPL160W | 12 |
| NAPAIIFIDEIDSIAPK              | 0.000 | 1.82E+05 | 913.999 | 609.668 | 6190 | 103.3 | YDL126C | 14 |
| NASNPNELAASGAALQAR             | 0.000 | 2.77E+05 | 934.964 | 623.645 | 2000 | 37.9  | YHR064C | 16 |
| NATFFPGVQMK                    | 0.000 | 3.00E+06 | 546.779 | 364.855 | 2141 | 40    | YLR044C | 9  |
| NAVVTVPAYFNDSQR                | 0.006 | 2.39E+05 | 840.921 | 560.95  | 3184 | 55.3  | YJR045C | 11 |
| NCTPKPTSTTETVAASVAAVFEQK       | 0.000 | 2.21E+06 | 1276.14 | 851.095 | 4514 | 73.8  | YAL038W | 11 |
| NDAIINQSTFK                    | 0.007 | 3.80E+05 | 625.822 | 417.551 | 2027 | 38.3  | YLR028C | 10 |
| NDLAITGAPDNAYAK                | 0.032 | 4.56E+04 | 767.381 | 511.923 | 1348 | 28.2  | YDR301W | 11 |
| NDPTLYESIISLLK                 | 0.020 | 4.31E+04 | 803.44  | 535.963 | 6354 | 107   | YNL287W | 11 |
| NDPTWQGPILAPGLINR              | 0.000 | 2.79E+05 | 931.5   | 621.335 | 4470 | 73.1  | YNL117W | 10 |
| NDVDVIANPDGER                  | 0.010 | 3.51E+05 | 707.334 | 471.892 | 1608 | 32.2  | YHR064C | 13 |
| NEFSGALSGLTR                   | 0.000 | 6.12E+05 | 626.32  | 417.882 | 3257 | 56.3  | YIL078W | 9  |
| NEGVTVPIILMGYYPILNYGEEER       | 0.007 | 2.89E+04 | 1377.69 | 918.798 | 6285 | 105.4 | YGL026C | 10 |
| NFEVLFLLDPIDEYAFTQLK           | 0.006 | 2.34E+05 | 1202.11 | 801.742 | 6419 | 108.6 | YMR186W | 16 |
| NFGIGQAVQPK                    | 0.000 | 1.93E+06 | 579.817 | 386.88  | 1996 | 37.9  | YHL033C | 10 |
| NFLETVELQVGLK                  | 0.010 | 5.99E+05 | 745.417 | 497.28  | 5433 | 88.4  | YGL135W | 15 |
| NFNDPEVQADMK                   | 0.000 | 1.44E+06 | 704.314 | 469.878 | 1798 | 35    | YAL005C | 12 |
| NFTPEQISSMVLGK                 | 0.000 | 2.89E+06 | 775.898 | 517.601 | 4783 | 77.6  | YAL005C | 15 |
| NGFILDGFPR                     | 0.000 | 9.21E+05 | 568.298 | 379.201 | 4816 | 78.1  | YDR226W | 8  |
| NILAESNSSLDNIVK                | 0.000 | 6.17E+05 | 808.928 | 539.621 | 3479 | 59.5  | YIL051C | 18 |
| NINSETTDEQFQELFAK              | 0.000 | 1.19E+05 | 1007.47 | 671.985 | 2786 | 71.8  | YER165W | 10 |
| NIPIEVVALINDTTGLTVASYTDPETK    | 0.000 | 3.42E+05 | 1519.28 | 1013.19 | 4746 | 120.9 | YGL253W | 16 |
| NISGASDETLHELGVPIPIAFDYPTVVK   | 0.016 | 6.53E+04 | 1542.3  | 1028.54 | 3426 | 87.8  | YOR184W | 8  |
| NIYYITGESLK                    | 0.000 | 3.16E+06 | 650.843 | 434.231 | 2947 | 51.8  | YMR186W | 11 |
| NLAGVDYLTISPALLDK              | 0.000 | 6.99E+05 | 901.999 | 601.668 | 5105 | 82.6  | YLR354C | 20 |
| NLATLLLDYIYQK                  | 0.010 | 2.35E+05 | 753.432 | 502.624 | 5643 | 92.4  | YDR071C | 16 |
| NLEILDLDQDNTFTK                | 0.006 | 1.64E+05 | 832.431 | 555.289 | 4524 | 73.9  | YMR235C | 13 |
| NLFTGWVDVK                     | 0.000 | 9.10E+06 | 589.814 | 393.545 | 4631 | 75.4  | YKL152C | 11 |
| NLFTVEDAIK                     | 0.026 | 4.40E+05 | 575.311 | 383.877 | 3606 | 61.2  | YLR355C | 8  |
| NLIAATAIAIVGFVQAVIGVYGEQFI     | 0.000 | 1.91E+05 | 1367.76 | 912.177 | 4015 | 66.7  | YLR356W | 10 |
| NLPDMIEELDLHED                 | 0.006 | 1.78E+05 | 841.883 | 561.591 | 5039 | 81.5  | YDL022W | 14 |
| NLQYYDISAK                     | 0.007 | 4.07E+05 | 607.806 | 405.54  | 2247 | 41.5  | YLR293C | 9  |
| NLSIVGLVGSIDNMSGTDSTIGAYSALER  | 0.016 | 4.07E+04 | 1528.25 | 1019.17 | 3391 | 86.9  | YGR240C | 9  |
| NLTEQAIIIDLTVATIAIK            | 0.000 | 1.13E+05 | 964.059 | 643.042 | 6415 | 108.5 | YMR120C | 13 |
| NLVNDEIIAALIELAK               | 0.020 | 6.00E+04 | 870.001 | 580.336 | 6849 | 119   | YBR196C | 12 |
| NMITGTSQADCAILLIAGGVGEFEAGISK  | 0.000 | 4.25E+05 | 1433.72 | 956.149 | 6700 | 115.2 | YBR118W | 18 |
| NNLNTENPLWDAIVGLGFLK           | 0.032 | 4.70E+04 | 1114.59 | 743.395 | 6973 | 122.2 | YDL185W | 11 |
| NNLWDDDVLR                     | 0.000 | 4.28E+05 | 665.823 | 444.218 | 3647 | 61.8  | YGR155W | 9  |
| NNYDGDVTVFSPTGR                | 0.020 | 5.93E+04 | 822.368 | 548.581 | 2124 | 39.7  | YMR314W | 10 |
| NPEEVEQVAEEAAAEEGEEEEEVK       | 0.000 | 8.31E+04 | 1308.08 | 872.387 | 4399 | 112   | YLR048W | 9  |
| NPHDIIEGINAGEIIPEN             | 0.016 | 7.22E+04 | 1037.51 | 692.008 | 2791 | 71.9  | YDR418W | 10 |

|                                 |       |          |         |         |      |       |         |    |
|---------------------------------|-------|----------|---------|---------|------|-------|---------|----|
| NPLFSYVEPVLVASAK                | 0.006 | 2.41E+05 | 867.477 | 578.654 | 5269 | 85.4  | YDL075W | 11 |
| NPSDITQEYNAFYK                  | 0.000 | 1.26E+06 | 909.913 | 606.944 | 3125 | 54.4  | YMR186W | 16 |
| NQAAMNPSNTVFDK                  | 0.000 | 1.85E+06 | 804.378 | 536.588 | 2084 | 39.2  | YAL005C | 17 |
| NQDLEQLEDSEAK                   | 0.020 | 3.70E+04 | 823.879 | 549.588 | 2359 | 43.1  | YIL138C | 10 |
| NQEIFDANVQR                     | 0.000 | 3.15E+06 | 667.328 | 445.221 | 1862 | 35.9  | YDL082W | 12 |
| NQILVSGEIPSTLNEESK              | 0.000 | 1.26E+05 | 979.507 | 653.341 | 3210 | 55.6  | YBR072W | 14 |
| NQLESIAYSLK                     | 0.000 | 3.97E+06 | 633.34  | 422.563 | 3437 | 58.9  | YAL005C | 12 |
| NQQIVAGKPLYVAIAQR               | 0.007 | 2.08E+05 | 935.039 | 623.695 | 2802 | 49.6  | YER165W | 10 |
| NQQLEEDLEESDTK                  | 0.006 | 1.13E+05 | 839.376 | 559.92  | 1889 | 36.3  | YNL079C | 10 |
| NSNPENTVGLISGAGANPR             | 0.007 | 5.01E+04 | 934.466 | 623.313 | 2425 | 44.1  | YHR200W | 10 |
| NSSCYFLGDATNDSLQR               | 0.000 | 1.54E+05 | 945.918 | 630.948 | 3000 | 52.5  | YIL078W | 10 |
| NTAAWHPIENLVGTVDLSDLSVIKPYTEESE | 0.000 | 2.41E+05 | 1846.39 | 1231.26 | 3663 | 93.6  | YOR230W | 9  |
| NTTRPDFIFYSDR                   | 0.034 | 2.73E+05 | 816.394 | 544.599 | 2941 | 51.7  | YHR128W | 8  |
| NTWGSQVLDQIMDQVVTK              | 0.028 | 2.33E+04 | 1031.52 | 688.014 | 3996 | 101.9 | YGL037C | 8  |
| NVAAILLEPIQGEAGIVVPPADYFPK      | 0.000 | 1.91E+05 | 1361.25 | 907.834 | 5915 | 97.7  | YLR438W | 13 |
| NVAFLYDMVDAEGFK                 | 0.020 | 4.24E+04 | 859.908 | 573.608 | 5384 | 87.6  | YBL064C | 10 |
| NVEVALNDPFIINDYSAYMFK           | 0.000 | 3.51E+04 | 1268.61 | 846.074 | 3543 | 90.7  | YJR009C | 7  |
| NVLEASNSSLDR                    | 0.007 | 2.78E+05 | 652.826 | 435.553 | 1472 | 30.2  | YER057C | 9  |
| NVNDVIAPAFVK                    | 0.000 | 4.77E+06 | 643.859 | 429.575 | 3177 | 55.2  | YGR254W | 14 |
| NVPGVETANVASLNLLQLAPGAHLGR      | 0.000 | 1.58E+06 | 1306.22 | 871.149 | 5079 | 82.2  | YBR031W | 17 |
| NVPLYQHLDLSK                    | 0.000 | 2.09E+06 | 749.407 | 499.94  | 3228 | 55.9  | YHR174W | 14 |
| NVQVLESVENK                     | 0.007 | 2.05E+05 | 629.836 | 420.226 | 4587 | 74.8  | YGR130C | 9  |
| NVVALGCGFVEGLGWGNNASAAIQR       | 0.020 | 6.45E+04 | 1252.13 | 835.089 | 5284 | 85.7  | YDL022W | 10 |
| NWGAETDELSMIMEHFSQQ             | 0.032 | 7.18E+04 | 1126.98 | 751.658 | 5978 | 98.9  | YOR369C | 14 |
| NYASEALISYFK                    | 0.021 | 1.58E+05 | 703.354 | 469.238 | 4633 | 75.5  | YKL081W | 10 |
| QAEITQGLESIDTVK                 | 0.024 | 3.16E+04 | 816.428 | 544.621 | 3174 | 55.1  | YDR044W | 10 |
| QAFDDAIAELDTLSEESYK             | 0.032 | 1.31E+05 | 1073    | 715.667 | 5508 | 89.8  | YOR099W | 13 |
| QAINLQVVLTLPTLALPR              | 0.007 | 2.85E+05 | 1026.1  | 684.405 | 6242 | 104.4 | YHL001W | 15 |
| QAVESADLILSVGALLSDFNTGFSFSYSYK  | 0.000 | 1.28E+05 | 1541.77 | 1028.18 | 5861 | 149.5 | YGR087C | 9  |
| QDGVLLVALSNEPAAR                | 0.000 | 3.81E+05 | 826.952 | 551.637 | 3889 | 65.1  | YPL231W | 15 |
| QDLPEAMSAAEITEK                 | 0.006 | 3.59E+05 | 816.893 | 544.931 | 2944 | 51.7  | YDL137W | 14 |
| QDVEALIEFIYDTEK                 | 0.000 | 9.62E+04 | 906.949 | 604.968 | 6085 | 101   | YPL231W | 11 |
| QFGYVILTTSAGIMDHEEAR            | 0.000 | 5.14E+04 | 1119.55 | 746.7   | 3917 | 99.9  | YJL190C | 7  |
| QIAPAELEGLDLER                  | 0.006 | 1.71E+05 | 833.954 | 556.305 | 5304 | 86    | YPL231W | 10 |
| QIENAGEEGSVIIGK                 | 0.020 | 6.29E+04 | 828.944 | 552.965 | 2709 | 48.2  | YLR259C | 10 |
| QITVVGATSGDTGSAAIYGLR           | 0.028 | 1.33E+04 | 1019.03 | 679.692 | 2921 | 75.2  | YCR053W | 8  |
| QLDNLYSSSNHSK                   | 0.032 | 6.02E+04 | 746.855 | 498.239 | 1723 | 33.9  | YOR093C | 10 |
| QLEDLNLFDNLR                    | 0.010 | 3.28E+05 | 745.386 | 497.26  | 4818 | 78.1  | YGR155W | 11 |
| QLENVSSNIVK                     | 0.000 | 1.10E+06 | 615.838 | 410.894 | 1647 | 32.8  | YHL015W | 11 |
| QLEQLGPNVLEDFDYSFSENGLTAYR      | 0.016 | 3.34E+04 | 1503.21 | 1002.48 | 3856 | 98.4  | YFL045C | 8  |
| QLGEWAGLGK                      | 0.000 | 1.04E+06 | 529.785 | 353.526 | 2851 | 50.3  | YOR369C | 8  |
| QNPQAIGQDLFTDPR                 | 0.006 | 7.17E+04 | 850.424 | 567.285 | 3259 | 56.4  | YOR027W | 10 |
| QPASFLFLGLSGSGK                 | 0.032 | 1.10E+05 | 754.909 | 503.608 | 4943 | 80    | YLL026W | 11 |
| QSISEAFGKPLSTLNQDEAIAK          | 0.006 | 1.87E+05 | 1224.63 | 816.759 | 3624 | 61.4  | YPL106C | 11 |
| QTSFASTASTASVVSSTSGR            | 0.000 | 1.87E+05 | 966.469 | 644.648 | 3470 | 59.3  | YER132C | 10 |
| QVLVASSEVLYAEAADEK              | 0.007 | 2.56E+04 | 961.491 | 641.33  | 5255 | 85.2  | YLR216C | 10 |
| QVNVNTIFGLPGDFNLSLLDK           | 0.021 | 1.47E+05 | 1152.62 | 768.746 | 6013 | 99.6  | YGR087C | 10 |
| QVNVNTVFLPGDFNLSLLDK            | 0.010 | 3.33E+05 | 1145.61 | 764.074 | 6023 | 99.8  | YLR044C | 11 |
| QVYFVADIENLSPLACAYAR            | 0.021 | 1.57E+05 | 1122.06 | 748.377 | 5698 | 93.4  | YMR120C | 10 |
| RPGADSDIGGFGLFLDAQAGFR          | 0.016 | 1.88E+05 | 1162.57 | 775.385 | 5608 | 91.7  | YGL234W | 15 |
| SAAIVNESLGGDPK                  | 0.028 | 1.33E+05 | 735.894 | 490.931 | 2888 | 50.9  | YPL262W | 11 |
| SANLMAGHWVAISGAAGGLGSLAVQYAK    | 0.000 | 2.90E+05 | 1350.7  | 900.802 | 8470 | 149.8 | YOL086C | 12 |
| SASEVASDLAQLTDFPVR              | 0.016 | 5.72E+04 | 1010.02 | 673.685 | 3641 | 93.1  | YGR279C | 9  |
| SASEYDASALASGDK                 | 0.010 | 2.30E+05 | 700.812 | 467.544 | 1243 | 26.6  | YGR209C | 11 |
| SAYLAAVPIAAILIK                 | 0.032 | 6.78E+04 | 757.471 | 505.317 | 5878 | 97    | YDR516C | 10 |
| SAYLAAVPLAAILIK                 | 0.032 | 6.78E+04 | 757.471 | 505.317 | 5878 | 97    | YCL040W | 10 |
| SAYVTTEEFIDAVESR                | 0.007 | 4.10E+04 | 908.934 | 606.292 | 4960 | 80.2  | YLR174W | 10 |

|                               |       |          |         |         |      |       |         |    |
|-------------------------------|-------|----------|---------|---------|------|-------|---------|----|
| SDEEIIDISK                    | 0.000 | 9.50E+05 | 631.33  | 421.222 | 3967 | 66.2  | YLR180W | 14 |
| SDLVDLLNIYK                   | 0.007 | 1.61E+05 | 646.858 | 431.575 | 5322 | 86.4  | YDL131W | 10 |
| SEAEAEAAGLPVVNLDR             | 0.000 | 3.39E+05 | 921.466 | 614.646 | 3425 | 58.7  | YLL018C | 19 |
| SEELYPGRPLAIALDTK             | 0.000 | 5.76E+05 | 937.007 | 625.007 | 3002 | 52.6  | YAL038W | 11 |
| SEGIEFFASPVTLGPDGIEK          | 0.000 | 2.48E+05 | 1047.03 | 698.353 | 3271 | 83.9  | YKL085W | 14 |
| SEGNPVIGVFQK                  | 0.007 | 2.93E+05 | 637.841 | 425.563 | 2942 | 51.7  | YPL231W | 12 |
| SEIFSTYADNQPGLVLIQVFEGER      | 0.000 | 4.73E+05 | 1300.14 | 867.094 | 5699 | 93.4  | YAL005C | 13 |
| SEIPEHVIQLLDSLPK              | 0.007 | 2.27E+05 | 909.504 | 606.672 | 5522 | 90.1  | YNR001C | 16 |
| SELEYAMLSK                    | 0.000 | 1.16E+06 | 667.321 | 445.216 | 3567 | 60.6  | YGL030W | 13 |
| SEPHITELDNQVGDGCGYTLVAGVK     | 0.007 | 4.31E+04 | 1359.14 | 906.429 | 3425 | 58.7  | YML070W | 11 |
| SEVFSTYADNQPGLVLIQVFEGER      | 0.000 | 4.00E+05 | 1293.13 | 862.422 | 5699 | 93.4  | YER103W | 11 |
| SEWPSLIEELLK                  | 0.010 | 4.48E+05 | 722.39  | 481.929 | 6208 | 103.7 | YMR205C | 11 |
| SEYTDMLATGIIDPFK              | 0.000 | 3.37E+05 | 900.94  | 600.962 | 5420 | 88.2  | YLR259C | 18 |
| SFDELGLAPELLK                 | 0.021 | 1.66E+05 | 716.39  | 477.929 | 4873 | 79    | YOR046C | 10 |
| SFDVPPPIDASSPFSQK             | 0.000 | 1.80E+06 | 958.475 | 639.319 | 3960 | 66.1  | YKL152C | 21 |
| SGAATLLVATAVAAR               | 0.025 | 8.93E+04 | 686.401 | 457.937 | 3767 | 63.5  | YOR204W | 9  |
| SGETEDPFIADLVVGLR             | 0.000 | 4.59E+06 | 909.468 | 606.648 | 5955 | 98.5  | YMR323W | 11 |
| SGETEDTFIADLVVGLR             | 0.000 | 6.28E+06 | 911.465 | 607.979 | 5950 | 98.4  | YGR254W | 22 |
| SGNNLVDSLADATLQQR             | 0.006 | 7.61E+04 | 859.421 | 573.283 | 3009 | 52.7  | YBR079C | 10 |
| SGVAVADESLTAFNDLK             | 0.000 | 7.64E+05 | 868.939 | 579.628 | 4174 | 68.9  | YLL050C | 18 |
| SGVVNSAFPAPDESJK              | 0.010 | 2.38E+05 | 760.883 | 507.591 | 2543 | 45.8  | YMR105C | 11 |
| SHDVVIIGGGPAGYVAAIK           | 0.025 | 8.71E+04 | 912.504 | 608.672 | 3552 | 60.4  | YFL018C | 10 |
| SHPDAFALDPLEFEK               | 0.026 | 3.58E+05 | 858.417 | 572.614 | 4166 | 68.8  | YOR285W | 10 |
| SIDVDDELWITIGR                | 0.006 | 1.37E+05 | 816.417 | 544.614 | 5724 | 93.9  | YPL091W | 14 |
| SIGGEVFIDFTK                  | 0.000 | 3.15E+06 | 656.843 | 438.231 | 4417 | 72.4  | YOL086C | 12 |
| SIIGATSIEDFISK                | 0.010 | 6.23E+05 | 740.898 | 494.268 | 4833 | 78.4  | YHR183W | 16 |
| SINPDEAVAYGAAVQAAITGDESSK     | 0.000 | 1.44E+06 | 1289.14 | 859.761 | 5499 | 89.6  | YAL005C | 19 |
| SINPDEAVAYGAAVQAAITGDAQSTK    | 0.006 | 2.29E+05 | 1295.65 | 864.105 | 5499 | 89.6  | YBL075C | 10 |
| SINPDEAVAYGAAVQAAITGQSTSDETK  | 0.000 | 2.71E+04 | 1447.21 | 965.14  | 5890 | 149.9 | YDL229W | 5  |
| SIQTMELAQIMK                  | 0.020 | 5.59E+04 | 817.928 | 545.621 | 6109 | 101.5 | YKL104C | 11 |
| SISIVGSYVGNR                  | 0.000 | 1.02E+06 | 626.338 | 417.895 | 2702 | 48.1  | YMR303C | 12 |
| SITGFTDVGETILGVDLSILK         | 0.016 | 3.50E+04 | 1033.06 | 689.04  | 3971 | 101.2 | YDR533C | 8  |
| SIVPSGASTGVHEALEMR            | 0.000 | 4.98E+05 | 920.965 | 614.312 | 2930 | 51.5  | YGR254W | 18 |
| SIVTLVKPWDETNLEEMVANVK        | 0.000 | 4.87E+05 | 1373.19 | 915.793 | 5410 | 88    | YAL003W | 18 |
| SIYLLAGNDPEGR                 | 0.021 | 1.57E+05 | 702.86  | 468.909 | 2993 | 52.4  | YOR335C | 12 |
| SLANTFLSLDTEGR                | 0.021 | 1.59E+05 | 762.389 | 508.595 | 4353 | 71.4  | YGL202W | 10 |
| SLFQGYFTDSAENVNMYLTQPNFVEQTLK | 0.000 | 5.98E+04 | 1692.81 | 1128.87 | 3967 | 101.1 | YKL210W | 7  |
| SLFVVGVDNVSSQQMHEVR           | 0.010 | 2.22E+05 | 1066.03 | 711.025 | 3318 | 57.3  | YLR340W | 11 |
| SLGNVIDPLDVTGIK               | 0.000 | 3.88E+05 | 827.475 | 551.986 | 5709 | 93.6  | YGR094W | 12 |
| SLTTVWAEHLSDEVK               | 0.006 | 2.52E+05 | 857.936 | 572.293 | 3764 | 63.4  | YOR063W | 10 |
| SLVALGIDPPDLK                 | 0.007 | 3.65E+05 | 684.89  | 456.929 | 3032 | 53    | YDL132W | 10 |
| SLVDNMITGVTK                  | 0.000 | 1.04E+06 | 639.342 | 426.564 | 3637 | 61.6  | YGL147C | 13 |
| SMTVFDPEPVQLADLSTQFFLTK       | 0.007 | 4.28E+04 | 1372.18 | 915.123 | 6420 | 108.6 | YKL210W | 10 |
| SNAIDLFVTGQIPTTEPELSEYQSK     | 0.000 | 1.50E+05 | 1398.18 | 932.459 | 5090 | 82.4  | YMR120C | 12 |
| SNDSEQELLEAFK                 | 0.021 | 1.51E+05 | 755.357 | 503.907 | 3978 | 66.3  | YBR109C | 11 |
| SNFATIADPEAR                  | 0.000 | 1.92E+06 | 646.317 | 431.214 | 2237 | 41.3  | YLR249W | 14 |
| SNGVLNVNDNQTSDLVK             | 0.000 | 4.58E+05 | 851.934 | 568.292 | 2789 | 49.4  | YDR447C | 10 |
| SNYDTDVFTPLFER                | 0.006 | 2.88E+05 | 852.399 | 568.602 | 4759 | 77.3  | YOR335C | 14 |
| SNYGMIAINPGR                  | 0.007 | 1.95E+05 | 646.824 | 431.552 | 2622 | 46.9  | YKL182W | 9  |
| SPQLSAAAASAASAASDR            | 0.024 | 3.04E+04 | 864.929 | 576.955 | 2439 | 44.3  | YLR219W | 10 |
| SPSALELQVHEIQGK               | 0.024 | 3.18E+04 | 818.439 | 545.962 | 2474 | 44.8  | YDR032C | 10 |
| SQAANSVDEALAAVK               | 0.021 | 1.43E+05 | 737.381 | 491.923 | 3058 | 53.4  | YJL130C | 10 |
| SQIDIVLVGGSTR                 | 0.000 | 2.03E+06 | 737.399 | 491.935 | 2858 | 50.4  | YBL075C | 12 |
| SQIDVVLVGGSTR                 | 0.000 | 3.06E+06 | 730.391 | 487.263 | 2863 | 50.5  | YDL229W | 16 |
| SQVDEIVLVGGSTR                | 0.000 | 3.51E+06 | 730.391 | 487.263 | 2863 | 50.5  | YAL005C | 17 |
| SSNITISNAVGR                  | 0.000 | 5.24E+05 | 609.825 | 406.886 | 1557 | 31.5  | YDL229W | 10 |
| SSPDENSTLLSNDISLK             | 0.000 | 2.45E+05 | 953.966 | 636.313 | 3065 | 53.5  | YMR205C | 16 |



|                                   |       |          |         |         |      |       |         |    |
|-----------------------------------|-------|----------|---------|---------|------|-------|---------|----|
| SSQSPETVYFASELK                   | 0.006 | 2.01E+05 | 836.907 | 558.274 | 3259 | 56.4  | YGR124W | 10 |
| SSVLADALNAINNAEK                  | 0.000 | 3.04E+06 | 815.426 | 543.953 | 5289 | 85.8  | YJL190C | 23 |
| STLEPVEQVVK                       | 0.000 | 4.48E+06 | 621.851 | 414.903 | 2922 | 51.4  | YDL229W | 9  |
| STLIEPTSGNTGIGLALIGAIIK           | 0.016 | 4.07E+04 | 1063.61 | 709.407 | 3431 | 87.9  | YGR155W | 8  |
| STSGNTHLGGQDFDTNLLLEHFK           | 0.000 | 4.62E+05 | 1209.57 | 806.716 | 3624 | 61.4  | YDL229W | 14 |
| SVAVDSSESNLK                      | 0.007 | 2.19E+05 | 618.309 | 412.542 | 897  | 20.6  | YPL061W | 9  |
| SVAVPVDILDHDNNYELK                | 0.007 | 2.82E+05 | 1021.02 | 681.013 | 3797 | 63.9  | YBR072W | 9  |
| SVDELITEGNEK                      | 0.000 | 1.27E+06 | 667.328 | 445.221 | 1972 | 37.5  | YOL039W | 12 |
| SVDELLTFIEGDSSNSK                 | 0.000 | 8.07E+04 | 920.944 | 614.299 | 5380 | 87.5  | YMR012W | 10 |
| SVDSIYQVVR                        | 0.044 | 2.42E+05 | 583.314 | 389.212 | 2691 | 47.9  | YBR025C | 8  |
| SVEMHHEQLEQGVPGDNVGFNVK           | 0.000 | 1.99E+06 | 1275.61 | 850.74  | 2344 | 42.9  | YBR118W | 18 |
| SVGETVDYIASNPDIAN                 | 0.006 | 2.19E+05 | 826.376 | 551.253 | 2749 | 48.8  | YKL192C | 12 |
| SVGFGLVYNSVAEAK                   | 0.000 | 1.14E+06 | 770.904 | 514.272 | 3928 | 65.7  | YER074W | 10 |
| SVLYNPPIEEFAVLETTFDEK             | 0.020 | 5.25E+04 | 1221.11 | 814.409 | 6194 | 103.4 | YER003C | 13 |
| SVQYVLEDPIAGPLVK                  | 0.000 | 4.12E+05 | 864.483 | 576.657 | 4439 | 72.7  | YHR019C | 15 |
| SYIEGTAVSQADVTVFK                 | 0.000 | 2.71E+05 | 907.962 | 605.644 | 3495 | 59.7  | YAL003W | 17 |
| TAEYKPIINSVIK                     | 0.034 | 2.66E+05 | 859.49  | 573.329 | 4436 | 72.6  | YMR105C | 9  |
| TAEQAEIDDTVGIMR                   | 0.026 | 5.50E+05 | 881.438 | 587.961 | 2141 | 40    | YAL030W | 8  |
| TAEQLENLNIQDDQK                   | 0.006 | 1.50E+05 | 879.929 | 586.955 | 4109 | 68    | YER165W | 10 |
| TAGIQIVADDLTVTNPAR                | 0.000 | 1.70E+07 | 928     | 619.002 | 4000 | 66.6  | YHR174W | 22 |
| TAGIQIVADDLTVTNPK                 | 0.000 | 4.03E+06 | 878.478 | 585.988 | 3794 | 63.9  | YGR254W | 21 |
| TAQLSLQDYLNQQANNQFNK              | 0.018 | 1.81E+04 | 1169.57 | 780.052 | 2692 | 69.4  | YLR150W | 7  |
| TASEIATTELPPTHPIR                 | 0.020 | 1.37E+05 | 917.489 | 611.995 | 2067 | 38.9  | YDR099W | 9  |
| TASGNIIPSSTGAAK                   | 0.000 | 2.05E+07 | 687.865 | 458.912 | 1232 | 26.4  | YGR192C | 11 |
| TAVALDTILNQK                      | 0.020 | 1.39E+05 | 643.869 | 429.582 | 3447 | 59    | YBL099W | 10 |
| TAVELGAVALK                       | 0.034 | 2.89E+05 | 536.324 | 357.885 | 2701 | 48.1  | YPL028W | 8  |
| TAVFYGGTPISK                      | 0.007 | 3.18E+05 | 620.832 | 414.224 | 2277 | 41.9  | YDL084W | 10 |
| TDLFADLPSQYFETR                   | 0.000 | 1.54E+05 | 959.447 | 639.967 | 5570 | 91    | YDR037W | 12 |
| TDTYPAGFMDVITLDATNENFR            | 0.006 | 1.99E+05 | 1296.6  | 864.736 | 5624 | 92    | YHR203C | 14 |
| TELDGILPLVAR                      | 0.007 | 3.84E+05 | 648.88  | 432.922 | 4687 | 76.2  | YAR015W | 9  |
| TELIHDGAYWVSDPFNAQFATAK           | 0.006 | 1.37E+05 | 1291.12 | 861.083 | 4609 | 75.1  | YFR044C | 10 |
| TEWIADYGAAASGR                    | 0.016 | 1.90E+05 | 734.347 | 489.9   | 2893 | 51    | YLR060W | 12 |
| TFIDLESSPELK                      | 0.010 | 4.21E+05 | 733.375 | 489.252 | 3428 | 58.8  | YNL096C | 13 |
| TFSPQEISAMVLTK                    | 0.010 | 6.71E+05 | 776.408 | 517.941 | 4748 | 77.1  | YDL229W | 12 |
| TFTTCADNQTTVQFPVYQGER             | 0.000 | 2.14E+05 | 1203.56 | 802.706 | 2398 | 61.8  | YDL229W | 6  |
| TFTTVSDNQTTVQFPVYQGER             | 0.006 | 3.40E+05 | 1209.58 | 806.724 | 3544 | 60.3  | YNL209W | 14 |
| TFTVDVSSPTENGVPDASYAK             | 0.000 | 3.60E+05 | 1166.55 | 778.038 | 2942 | 75.7  | YLR061W | 8  |
| TGDLAGTATTSSFEAVIK                | 0.000 | 8.01E+04 | 935.476 | 623.986 | 3390 | 58.2  | YOR136W | 13 |
| TGGFLFPVLSESK                     | 0.010 | 2.96E+05 | 764.906 | 510.273 | 5623 | 92    | YOR204W | 12 |
| TGIWAGVDASQPPATVWADILNK           | 0.006 | 2.87E+05 | 1205.62 | 804.085 | 5784 | 95.1  | YDR226W | 12 |
| TGLDISDDAR                        | 0.000 | 1.63E+06 | 531.757 | 354.84  | 1511 | 30.8  | YDL229W | 11 |
| TGLSVVDDDIYQK                     | 0.010 | 2.58E+05 | 726.864 | 484.912 | 2683 | 47.8  | YNR016C | 11 |
| TGTLTSETAHNMK                     | 0.032 | 1.21E+05 | 746.359 | 497.908 | 658  | 16    | YDR385W | 10 |
| TGTTTTNDVDYPIPPNHEMIFTTDDK        | 0.007 | 3.81E+04 | 1411.64 | 941.432 | 3355 | 57.7  | YAL038W | 12 |
| TGVIVGEDVHNLFTYAK                 | 0.000 | 3.23E+05 | 931.986 | 621.66  | 4015 | 66.7  | YKL060C | 12 |
| TGWLVEIVNYNVENQQYVAAGDLR          | 0.007 | 4.19E+04 | 1376.19 | 917.796 | 5695 | 93.4  | YKL182W | 10 |
| THSTYAFESNTNSVAASQMR              | 0.010 | 2.38E+05 | 1101.5  | 734.668 | 1863 | 35.9  | YKL035W | 12 |
| TIAETLAEELINAAK                   | 0.010 | 5.37E+05 | 793.935 | 529.626 | 5933 | 98.1  | YJR123W | 13 |
| TILEDGPESELLEPLYER                | 0.000 | 8.34E+04 | 1052.03 | 701.688 | 3256 | 83.5  | YER036C | 10 |
| TIVWNGPPGVFEFEK                   | 0.000 | 2.39E+06 | 860.441 | 573.963 | 4904 | 79.4  | YCR012W | 15 |
| TLEDELEVTEGMR                     | 0.021 | 1.57E+05 | 761.359 | 507.908 | 3513 | 59.9  | YLR259C | 10 |
| TLEEGVEMANSSEFGLSGIETESLSTGLK     | 0.000 | 8.61E+04 | 1536.73 | 1024.82 | 2626 | 67.7  | YPL061W | 9  |
| TLELDEYQFNFDGDAEDLAAFADSANEEELQNK | 0.000 | 2.40E+04 | 1876.32 | 1251.22 | 3893 | 99.3  | YER110C | 8  |
| TLEAIDAIEQPSRPTDKPLR              | 0.000 | 2.39E+06 | 1182.15 | 788.436 | 3928 | 65.7  | YBR118W | 10 |
| TLSSSAQTSIEIDSLFEGIDFYTSITR       | 0.000 | 2.45E+04 | 1491.23 | 994.492 | 4500 | 114.5 | YER103W | 5  |
| TLSSSAQTSVEIDSLFEGIDFYTSITR       | 0.000 | 2.45E+04 | 1484.23 | 989.821 | 4500 | 114.5 | YAL005C | 5  |
| TLSSVTQTTVEVDSLFDGEDFESSLTR       | 0.000 | 5.14E+04 | 1482.2  | 988.472 | 3855 | 98.4  | YDL229W | 6  |

|                                       |       |          |         |         |      |       |           |    |
|---------------------------------------|-------|----------|---------|---------|------|-------|-----------|----|
| TMVGGNDYEIFVDER                       | 0.006 | 1.51E+05 | 872.896 | 582.266 | 3774 | 63.6  | YFL045C   | 11 |
| TMYAADGDYLETYK                        | 0.006 | 1.01E+05 | 820.861 | 547.576 | 2899 | 51    | YBR149W   | 11 |
| TNEAAGDGTTSATVLGR                     | 0.006 | 2.52E+05 | 810.895 | 540.932 | 1294 | 27.4  | YLR259C   | 14 |
| TNEIILVDEVLPDSSR                      | 0.000 | 1.84E+05 | 950.997 | 634.334 | 4910 | 79.5  | YAR015W   | 10 |
| TNNPETLVALR                           | 0.000 | 5.01E+06 | 614.338 | 409.895 | 2542 | 45.8  | YAL038W   | 14 |
| TNQLVPEVLEYNVR                        | 0.000 | 5.72E+05 | 837.446 | 558.633 | 4054 | 67.3  | YGL234W   | 10 |
| TPANAAPVASTPLK                        | 0.000 | 9.45E+05 | 669.375 | 446.586 | 1422 | 29.4  | YLR044C   | 10 |
| TPGGGQAALR                            | 0.026 | 3.66E+05 | 512.78  | 342.189 | 796  | 18.7  | YCR031C   | 10 |
| TPTAAAWDSPESHIGVAK                    | 0.007 | 4.83E+04 | 919.458 | 613.307 | 2295 | 42.2  | YGR155W   | 10 |
| TQDLLLDVAPLSLGIETAGGIMTK              | 0.006 | 1.41E+05 | 1285.21 | 857.143 | 6439 | 109   | YBL075C   | 10 |
| TQDLLLDVAPLSLGIETAGGVMTK              | 0.006 | 3.77E+05 | 1278.2  | 852.472 | 6449 | 109.2 | YAL005C   | 14 |
| TQELPSLAQSTQR                         | 0.032 | 1.21E+05 | 729.881 | 486.923 | 1903 | 36.5  | YIL041W   | 10 |
| TQFENSNEIGVFSK                        | 0.020 | 4.63E+04 | 800.386 | 533.926 | 2764 | 49.1  | YPR016C   | 11 |
| TQFSWQYYYYLTHEEGVEYLR                 | 0.007 | 3.48E+04 | 1370.13 | 913.759 | 6320 | 106.2 | YMR230W   | 10 |
| TSAAVAAALTEVR                         | 0.000 | 1.56E+06 | 559.314 | 373.212 | 2436 | 44.3  | YHL033C   | 10 |
| TSEIMHLVNPPIENVR                      | 0.007 | 1.98E+05 | 933.001 | 622.336 | 4447 | 72.8  | YCL030C   | 9  |
| TSFFQALGVPTK                          | 0.000 | 8.54E+05 | 648.353 | 432.571 | 4397 | 72.1  | YLR340W   | 11 |
| TSLFLNLANOPTIER                       | 0.006 | 1.85E+05 | 852.452 | 568.637 | 4419 | 72.4  | YBR127C   | 11 |
| TSPTGVSNDVMGVSPPR                     | 0.047 | 2.29E+04 | 802.391 | 535.263 | 2904 | 51.1  | YBR161W   | 10 |
| TSPYVLPVFLNVLNNGSSHAGGALALQEFMIAPTGAK | 0.000 | 2.44E+05 | 1869.49 | 1246.66 | 4338 | 110.4 | YGR254W   | 13 |
| TTANLPANSSTSPAPISPTGFK                | 0.032 | 2.84E+04 | 1123.57 | 749.381 | 5288 | 85.8  | YLR335W   | 10 |
| TTPSFVAFDTDR                          | 0.010 | 4.54E+05 | 736.357 | 491.24  | 3283 | 56.7  | YAL005C   | 12 |
| TTPSFVGFDTDR                          | 0.000 | 1.64E+06 | 729.349 | 486.568 | 3048 | 53.2  | YLL024C   | 13 |
| TTQNPDELWEFIADSLK                     | 0.007 | 2.11E+05 | 1003.99 | 669.662 | 6417 | 108.5 | YGL253W   | 12 |
| TTYTTQRPVYGLPANLVDLNVPAK              | 0.000 | 5.88E+06 | 1372.75 | 915.504 | 4880 | 79    | YLR134W   | 11 |
| TTYVTQRPVYGLPANLVDLNVPAK              | 0.000 | 8.09E+06 | 1371.76 | 914.844 | 4880 | 79    | YLR044C   | 20 |
| TVAGGAYTVSTAAATVR                     | 0.000 | 8.63E+05 | 833.942 | 556.297 | 2444 | 44.4  | YJR094W-A | 25 |
| TVASSGQELSVEER                        | 0.010 | 7.08E+05 | 746.368 | 497.914 | 1288 | 27.3  | YER177W   | 16 |
| TVAVDSVFEQNEMIDIAIVTK                 | 0.032 | 7.20E+04 | 1140.58 | 760.719 | 5063 | 81.9  | YOR063W   | 11 |
| TVEQLGQEEYEK                          | 0.010 | 2.47E+05 | 726.846 | 484.9   | 1443 | 29.7  | YJL167W   | 10 |
| TVESVNVIVSTYAEVLGDVQVYPAR             | 0.000 | 6.10E+05 | 1412.22 | 941.819 | 6415 | 108.5 | YDR385W   | 15 |
| TVFESLDQAWSLLR                        | 0.006 | 1.20E+05 | 832.936 | 555.626 | 6009 | 99.5  | YBR127C   | 10 |
| TVFIQELINNIK                          | 0.032 | 7.96E+04 | 751.932 | 501.624 | 5913 | 97.7  | YJR121W   | 11 |
| TVIFTHGVEPTVVVSSK                     | 0.007 | 4.16E+04 | 900.499 | 600.668 | 2775 | 49.2  | YJR105W   | 12 |
| TVLVYGHYDVQPAQLEDGWDTEPFK             | 0.000 | 8.72E+04 | 1454.2  | 969.799 | 4595 | 74.9  | YFR044C   | 10 |
| TVPFVPISGWNGDNMIEATTNAPWYK            | 0.000 | 2.21E+06 | 1454.7  | 970.137 | 5875 | 96.9  | YBR118W   | 15 |
| TVPGSSLTSPVPGFAAGDVQDSK               | 0.000 | 8.06E+04 | 1134.06 | 756.378 | 2877 | 74.1  | YDR353W   | 7  |
| TVSQADFPGLGVAK                        | 0.010 | 2.42E+05 | 759.894 | 506.931 | 3113 | 54.2  | YIL078W   | 13 |
| TVVVVGTVTDDAR                         | 0.000 | 2.45E+06 | 666.362 | 444.577 | 1937 | 37    | YNL301C   | 16 |
| TYIGNLLALSISDNLVNK                    | 0.000 | 9.66E+04 | 1018.06 | 679.041 | 3701 | 94.5  | YGR180C   | 8  |
| TYPVEDPSTENTVCEVSSATTEDVEYAIECADR     | 0.000 | 8.24E+04 | 1812.28 | 1208.52 | 3928 | 100.2 | YPL061W   | 7  |
| VAASFQEQALQYVVER                      | 0.020 | 3.77E+04 | 898.963 | 599.644 | 4339 | 71.2  | YKL182W   | 10 |
| VAAVETLYQDMAAR                        | 0.010 | 5.56E+05 | 769.388 | 513.261 | 3998 | 66.5  | YMR242C   | 15 |
| VAPEEHPVLLTEAPMNP                     | 0.000 | 1.07E+06 | 986.514 | 658.012 | 2562 | 46.1  | YFL039C   | 11 |
| VASANATAAESDVAK                       | 0.010 | 2.38E+05 | 702.852 | 468.904 | 848  | 19.7  | YIL133C   | 11 |
| VAVDDPSVLAEVEAVLAGVEAEK               | 0.032 | 6.88E+04 | 1155.61 | 770.741 | 6733 | 116.1 | YDR342C   | 10 |
| VDALEQETVYR                           | 0.030 | 7.59E+04 | 661.833 | 441.558 | 2017 | 38.2  | YDL110C   | 9  |
| VDELLEVAR                             | 0.000 | 9.47E+05 | 515.282 | 343.857 | 2226 | 41.1  | YDR226W   | 10 |
| VDFNVPLDGG                            | 0.000 | 8.12E+05 | 552.29  | 368.529 | 2896 | 51    | YCR012W   | 10 |
| VDIANDQGNR                            | 0.000 | 4.33E+05 | 607.81  | 405.542 | 1157 | 25.2  | YAL005C   | 9  |
| VDPLVIELVTGAK                         | 0.045 | 5.09E+04 | 677.403 | 451.938 | 5207 | 84.4  | YGL195W   | 13 |
| VEEQEQQQQIIK                          | 0.006 | 1.72E+05 | 814.418 | 543.281 | 999  | 22.4  | YHL015W   | 18 |
| VEFLEDTSR                             | 0.000 | 2.91E+06 | 548.269 | 365.849 | 2051 | 38.7  | YLR264W   | 11 |
| VEGIGDFVPQVLDLR                       | 0.006 | 2.63E+05 | 853.941 | 569.63  | 5059 | 81.9  | YGR155W   | 10 |
| VELDALFNIAELK                         | 0.032 | 1.07E+05 | 737.911 | 492.277 | 5703 | 93.5  | YPL218W   | 15 |
| VENIISWGYGTPGAGAYDIK                  | 0.000 | 1.11E+05 | 1137.56 | 758.707 | 3127 | 80.3  | YLR179C   | 12 |

|                           |       |          |         |         |      |       |         |    |
|---------------------------|-------|----------|---------|---------|------|-------|---------|----|
| VENPFDPMENISLAGK          | 0.000 | 1.08E+05 | 905.938 | 604.294 | 5775 | 94.9  | YJL026W | 12 |
| VESIVAEASDFVTEVLK         | 0.014 | 2.39E+04 | 918.485 | 612.659 | 6740 | 116.2 | YJL080C | 10 |
| VESLGSPSGATK              | 0.026 | 4.09E+05 | 566.796 | 378.2   | 751  | 17.8  | YDR155C | 8  |
| VETGVIKPGMVVTFAPAGVTEVK   | 0.000 | 1.24E+07 | 1215.67 | 810.782 | 3959 | 66.1  | YBR118W | 19 |
| VFAEDYLDINGSPINPYAR       | 0.016 | 3.32E+04 | 1077.53 | 718.688 | 3011 | 77.4  | YBR127C | 10 |
| VFDALNDLEQLK              | 0.010 | 2.86E+05 | 702.872 | 468.917 | 4593 | 74.9  | YBR218C | 12 |
| VFEEEGAFIEALER            | 0.006 | 2.53E+05 | 819.904 | 546.939 | 5089 | 82.4  | YJR016C | 13 |
| VFITDEAEDLIPEWLSFVK       | 0.000 | 3.30E+05 | 1126.08 | 751.056 | 4682 | 119.2 | YMR186W | 12 |
| VFNLPLPFTTTIGSFPPQTK      | 0.000 | 9.72E+04 | 1054.57 | 703.386 | 3676 | 94    | YER091C | 9  |
| VFNTVVSTDSTPVTNQK         | 0.007 | 3.50E+04 | 918.971 | 612.983 | 2145 | 40    | YNL239W | 10 |
| VFQVGNIVHPSVVVNSDEENNELVR | 0.000 | 6.60E+04 | 1397.21 | 931.81  | 3805 | 64    | YDR023W | 16 |
| VFSLDPQYLVDLDRPEFAGYSK    | 0.006 | 2.81E+05 | 1280.14 | 853.764 | 5689 | 93.2  | YMR116C | 13 |
| VGDPFDESTFQGAQTSQMQLNK    | 0.020 | 5.32E+04 | 1214.56 | 810.041 | 3499 | 59.7  | YOR374W | 14 |
| VGEYNAETDEVELIFDDYLYAK    | 0.006 | 6.93E+04 | 1298.6  | 866.071 | 6184 | 103.1 | YIL053W | 11 |
| VGIPAGVVNIVPGPGR          | 0.000 | 1.94E+06 | 751.446 | 501.3   | 3858 | 64.7  | YPL061W | 17 |
| VGIVLGGIGSMGTLISK         | 0.018 | 6.77E+04 | 829.979 | 553.655 | 5049 | 81.7  | YMR318C | 10 |
| VGLIGSCTNSSYEDMSR         | 0.000 | 7.58E+04 | 909.903 | 606.938 | 2565 | 46.1  | YLR304C | 10 |
| VGVSILEAGDSIDLTTLA        | 0.000 | 7.87E+05 | 937.012 | 625.01  | 6510 | 110.7 | YGL030W | 21 |
| VGTYLPSHIISTSDVTR         | 0.000 | 3.50E+05 | 923.489 | 615.995 | 3000 | 52.5  | YBR031W | 16 |
| VIDVDGNPVIEVQYLEETK       | 0.010 | 7.37E+05 | 1080.56 | 720.707 | 4808 | 78    | YDL229W | 18 |
| VIEQPITSETAMK             | 0.000 | 9.54E+05 | 723.879 | 482.922 | 1798 | 35    | YOL127W | 12 |
| VILFIGDGLQLTVQEISTMIR     | 0.020 | 5.49E+04 | 1217.17 | 811.786 | 8444 | 149.5 | YGR087C | 11 |
| VINDAFGIEEGLMTTVHSLTATQK  | 0.000 | 3.07E+06 | 1288.16 | 859.107 | 5884 | 97.1  | YGR192C | 21 |
| VINDAFGIEEGLMTTVHSMTATQK  | 0.000 | 8.18E+05 | 1297.14 | 865.093 | 5884 | 97.1  | YJL052W | 12 |
| VITLPDYPGVDADNIK          | 0.000 | 2.00E+06 | 865.454 | 577.305 | 3764 | 63.4  | YBR072W | 14 |
| VLDEVVVDNFDQK             | 0.010 | 7.00E+05 | 760.386 | 507.259 | 3183 | 55.3  | YLR259C | 16 |
| VLENTEIGDSIFDK            | 0.000 | 2.95E+06 | 790.396 | 527.267 | 3538 | 60.2  | YCR012W | 17 |
| VLEQLSGQTPVQSK            | 0.000 | 2.75E+06 | 757.415 | 505.279 | 1668 | 33.1  | YGR085C | 18 |
| VLNEQVDESYGLR             | 0.010 | 2.32E+05 | 761.381 | 507.923 | 2283 | 42    | YER110C | 12 |
| VLVLDGGQGTLENR            | 0.006 | 7.84E+04 | 800.42  | 533.949 | 2599 | 46.6  | YPL273W | 10 |
| VNDAVVTVPAYFNDSQR         | 0.000 | 3.07E+06 | 947.968 | 632.315 | 3465 | 59.3  | YAL005C | 19 |
| VNGSPITLVEPEILR           | 0.000 | 2.24E+06 | 818.967 | 546.314 | 4809 | 78    | YDL083C | 10 |
| VNLAVITVPAYFNDSQR         | 0.000 | 9.86E+05 | 954.005 | 636.339 | 3480 | 59.5  | YLR369W | 10 |
| VNLDTDCQYAYLTGIR          | 0.000 | 4.18E+06 | 922.946 | 615.633 | 3830 | 64.4  | YKL060C | 11 |
| VNLENPIAVLDSYTPSTNEPYAR   | 0.000 | 3.70E+05 | 1387.21 | 925.14  | 5340 | 86.7  | YKL182W | 17 |
| VNNLIFLSGQIPVTPDNK        | 0.000 | 1.09E+05 | 985.041 | 657.03  | 4580 | 74.7  | YER057C | 10 |
| VNNPNVSLIK                | 0.000 | 9.06E+05 | 549.319 | 366.549 | 1686 | 33.4  | YOR234C | 9  |
| VNPETGIIDYDTLEK           | 0.000 | 1.73E+06 | 853.928 | 569.621 | 3344 | 57.6  | YLR058C | 19 |
| VNQAIALLTIGAR             | 0.000 | 5.16E+05 | 670.406 | 447.273 | 4207 | 69.4  | YJR123W | 14 |
| VNQIGTLESISK              | 0.000 | 1.71E+07 | 644.859 | 430.242 | 2322 | 42.6  | YGR254W | 17 |
| VPAINVNDSVTK              | 0.000 | 5.61E+05 | 628.846 | 419.566 | 1752 | 34.4  | YER043C | 9  |
| VPIPAYLIGIASGDLSSAPIGPR   | 0.032 | 8.59E+04 | 1132.64 | 755.426 | 6123 | 101.8 | YNL045W | 10 |
| VPLSDNAIIEANL GK          | 0.010 | 6.73E+05 | 777.43  | 518.623 | 3368 | 57.9  | YGL076C | 16 |
| VPPTIAQFQYTLDR            | 0.006 | 2.03E+05 | 824.938 | 550.295 | 4059 | 67.3  | YHL033C | 10 |
| VPTVDVSVVDLTVK            | 0.000 | 6.85E+06 | 735.924 | 490.952 | 4053 | 67.2  | YGR192C | 18 |
| VQGGEEVNAEELK             | 0.010 | 2.31E+05 | 701.346 | 467.9   | 1303 | 27.5  | YJR045C | 10 |
| VQPVPQPSQTSTYPGQGMPTPK    | 0.032 | 6.06E+04 | 1114.55 | 743.372 | 1998 | 37.9  | YNL007C | 10 |
| VQQLQQQQAQQELFQQQLQK      | 0.043 | 2.65E+04 | 1235.15 | 823.766 | 2809 | 49.7  | YNL243W | 10 |
| VQSEYLGIPPEGPFK           | 0.000 | 4.75E+05 | 846.928 | 564.954 | 3809 | 64.1  | YER043C | 13 |
| VSQFQSVVIPVGITK           | 0.006 | 1.34E+05 | 801.467 | 534.647 | 3869 | 64.9  | YHR020W | 14 |
| VSEGVNVEK                 | 0.000 | 1.16E+06 | 530.288 | 353.861 | 1496 | 30.6  | YLR448W | 8  |
| VTDGALVVDTIEGVCVQTETVLR   | 0.006 | 1.25E+05 | 1258.67 | 839.447 | 6309 | 106   | YDR385W | 14 |
| VELLGFDK                  | 0.026 | 4.63E+05 | 511.282 | 341.19  | 2956 | 51.9  | YLR359W | 10 |
| VTPEEADLGMIAYYFQK         | 0.040 | 5.45E+04 | 987.98  | 658.989 | 5747 | 94.4  | YMR205C | 9  |
| VTVIGSGNWTGTTIAK          | 0.016 | 2.03E+05 | 752.412 | 501.944 | 2703 | 48.1  | YDL022W | 10 |
| VTYDITSKPPATVEWE          | 0.000 | 9.36E+04 | 918.457 | 612.64  | 3435 | 58.9  | YMR217W | 14 |
| VVADDLVLVTPK              | 0.007 | 2.77E+05 | 634.877 | 423.587 | 3297 | 56.9  | YOR198C | 11 |

|                                         |       |          |         |         |      |       |         |    |
|-----------------------------------------|-------|----------|---------|---------|------|-------|---------|----|
| VVDLIEYVAK                              | 0.000 | 5.64E+06 | 574.832 | 383.557 | 4011 | 66.7  | YJL052W | 11 |
| VVDLVEHVAK                              | 0.000 | 2.88E+06 | 554.822 | 370.217 | 1521 | 30.9  | YGR192C | 10 |
| VVEIGPSPTLAGMAQR                        | 0.006 | 1.86E+05 | 813.438 | 542.628 | 3174 | 55.1  | YPL231W | 16 |
| VVGLSTLPEIYEK                           | 0.000 | 1.01E+07 | 724.406 | 483.273 | 3883 | 65.1  | YOL086C | 18 |
| VVITAPSSAPMFVVGVNHTK                    | 0.010 | 3.09E+05 | 1071.07 | 714.386 | 3428 | 58.8  | YJL052W | 10 |
| VVITAPSTAPMFVMGVNEEK                    | 0.000 | 1.70E+06 | 1104.06 | 736.374 | 4303 | 70.7  | YGR192C | 17 |
| VVNEPTAAALAYGLDK                        | 0.000 | 1.22E+06 | 816.436 | 544.626 | 3809 | 64.1  | YEL030W | 12 |
| VVNEPTAAALAYGLEK                        | 0.000 | 7.70E+05 | 823.443 | 549.298 | 3549 | 60.4  | YJR045C | 21 |
| VVNGNSADAAYAQVEIQPR                     | 0.000 | 8.09E+04 | 1001.5  | 668.004 | 1831 | 47.2  | YPL231W | 8  |
| VVNQLLTEMDCMNAK                         | 0.006 | 1.10E+05 | 831.913 | 554.945 | 3739 | 63.1  | YDL126C | 11 |
| VVSVGKPIEELLANPANEWTK                   | 0.006 | 1.55E+05 | 1212.14 | 808.432 | 4709 | 76.5  | YOR335C | 10 |
| VVVFEDAPAGIAAGK                         | 0.000 | 1.14E+06 | 722.396 | 481.933 | 3023 | 52.9  | YER062C | 17 |
| VWLDPNETSEIAQANSR                       | 0.000 | 4.86E+05 | 965.469 | 643.982 | 3200 | 55.5  | YBL027W | 18 |
| VYEPLLLVGLDK                            | 0.000 | 1.89E+06 | 679.9   | 453.603 | 5042 | 81.6  | YDL083C | 15 |
| VYFQGGNNELGTAVGK                        | 0.000 | 2.95E+05 | 908.947 | 606.3   | 2975 | 52.2  | YGL030W | 19 |
| WAGNANELNAAYAADGYAR                     | 0.000 | 1.65E+06 | 999.459 | 666.642 | 2270 | 41.8  | YGR087C | 13 |
| WGLKPYIFVLNNGYTIK                       | 0.010 | 6.24E+05 | 1135.1  | 757.072 | 5158 | 83.5  | YLR134W | 10 |
| WGLKPYFLVNNNDGYTIK                      | 0.000 | 2.50E+06 | 1135.6  | 757.4   | 5148 | 83.4  | YGR087C | 14 |
| WSFEEVEVK                               | 0.000 | 9.03E+05 | 576.782 | 384.857 | 3521 | 60    | YJR123W | 8  |
| WTANLLPAR                               | 0.026 | 5.75E+05 | 521.296 | 347.866 | 2901 | 51.1  | YJL190C | 9  |
| YAAAAPAATSAASGDAAPAEAAAAEEEEESDDDMGFLFD | 0.000 | 6.80E+04 | 1960.81 | 1307.54 | 3074 | 79    | YLR340W | 8  |
| YAQDGAGIER                              | 0.026 | 5.07E+05 | 540.259 | 360.509 | 731  | 17.4  | YOR063W | 9  |
| YATASIAAATAVASLVLAR                     | 0.007 | 3.62E+04 | 910.517 | 607.347 | 5990 | 99.2  | YBR031W | 11 |
| YDIGNPVTGETLESFR                        | 0.006 | 3.13E+05 | 874.428 | 583.288 | 3004 | 52.6  | YBR121C | 12 |
| YDEAWFPYQK                              | 0.010 | 3.76E+05 | 730.348 | 487.235 | 4858 | 78.7  | YDR023W | 12 |
| YDLLCIEGISQLNEYLER                      | 0.000 | 3.82E+04 | 1129.55 | 753.372 | 4077 | 103.8 | YLR060W | 7  |
| YDNQIAVGLDFQK                           | 0.018 | 6.62E+04 | 829.415 | 553.279 | 4744 | 77    | YKL210W | 10 |
| YDTATAADLR                              | 0.034 | 2.62E+05 | 548.767 | 366.18  | 1256 | 26.8  | YLL026W | 8  |
| YEISQQPENVSNSLK                         | 0.000 | 2.88E+05 | 924.971 | 616.983 | 2555 | 46    | YKL035W | 16 |
| YESATASALVN                             | 0.026 | 4.62E+05 | 563.275 | 375.852 | 1821 | 35.4  | YDR064W | 9  |
| YFEVILVDPQHK                            | 0.010 | 3.03E+05 | 744.398 | 496.601 | 3498 | 59.7  | YLR029C | 10 |
| YGASAGNVGDEGGVAPNIQTAEALDLIVDAIK        | 0.000 | 4.87E+06 | 1629.31 | 1086.54 | 4961 | 126.4 | YGR254W | 16 |
| YGGVYVGTLSKPEVK                         | 0.021 | 1.41E+05 | 798.935 | 532.959 | 1663 | 33    | YLR044C | 10 |
| YGHAEFVPILESPEGK                        | 0.007 | 2.63E+05 | 944.46  | 629.976 | 3557 | 60.5  | YLR438W | 9  |
| YGVIVHDIAATPNLIDR                       | 0.006 | 1.03E+05 | 898.489 | 599.328 | 3699 | 62.5  | YDL055C | 10 |
| YGYQLYTSNPSGNYTGWK                      | 0.028 | 2.07E+04 | 1049.98 | 700.322 | 2386 | 61.5  | YGR135W | 8  |
| YIEDFVGPVVEWVGTGPARR                    | 0.000 | 5.24E+05 | 1046.03 | 697.69  | 3396 | 87    | YNL220W | 12 |
| YIETQALLLAPIAPHFAEYIYR                  | 0.020 | 5.99E+04 | 1296.7  | 864.8   | 5674 | 93    | YPL160W | 10 |
| YIQTEQQEIEPEGVTVSIK                     | 0.010 | 2.20E+05 | 1088.08 | 725.723 | 3643 | 61.7  | YNL067W | 10 |
| YIQTEQQEIEVEGTVTVSIK                    | 0.016 | 2.13E+05 | 1081.07 | 721.051 | 3638 | 61.6  | YGL147C | 11 |
| YLAAYLLLQVGGNAAPSAADIK                  | 0.032 | 5.67E+04 | 1110.11 | 740.407 | 5318 | 86.3  | YDR382W | 10 |
| YLAEFSSGDAR                             | 0.000 | 8.04E+05 | 608.286 | 405.86  | 1852 | 35.8  | YDR099W | 9  |
| YLGKPGSIDAISQVINIAK                     | 0.010 | 3.17E+05 | 1050.61 | 700.74  | 5103 | 82.6  | YKL182W | 13 |
| YLIENFSAQLQNPEGK                        | 0.000 | 3.21E+05 | 925.968 | 617.648 | 3925 | 65.6  | YGR180C | 14 |
| YNEIVNLTLPDGTVR                         | 0.000 | 7.59E+05 | 852.452 | 568.637 | 4009 | 66.7  | YBR127C | 14 |
| YNPDDTIAPPQDATEESQTK                    | 0.000 | 2.65E+05 | 1110.5  | 740.669 | 1392 | 35.9  | YOR230W | 7  |
| YNVIVTFPSTPDELVSFVGLR                   | 0.024 | 3.13E+04 | 1234.64 | 823.428 | 5954 | 98.5  | YJL080C | 10 |
| YPIEHGIVTNWDDMEK                        | 0.000 | 6.18E+05 | 973.951 | 649.637 | 3332 | 57.4  | YFL039C | 13 |
| YSSSGTPENITGEADDEDIIR                   | 0.000 | 2.51E+04 | 1257.04 | 838.365 | 2008 | 51.8  | YLR257W | 7  |
| YTNPVVIQAGAGAAVTAAGVLGDVIK              | 0.006 | 1.80E+05 | 1256.69 | 838.131 | 5549 | 90.6  | YJR139C | 18 |
| YTQVLKPIAFPGGLLEDNVK                    | 0.032 | 9.38E+04 | 1101.61 | 734.744 | 4583 | 74.7  | YJL130C | 10 |
| YTVSFIEGDGIGPEISK                       | 0.000 | 2.00E+05 | 906.457 | 604.64  | 4075 | 67.5  | YOR136W | 14 |
| YVDPNVLPETESLALVIDR                     | 0.000 | 8.92E+05 | 1072.07 | 715.048 | 5348 | 86.9  | YKL152C | 17 |
| YVHVSEVGNCSGSMGGVSALR                   | 0.032 | 1.09E+05 | 1083.51 | 722.674 | 2303 | 42.3  | YPL231W | 12 |
| YVYAHFPINVNIVEK                         | 0.007 | 2.48E+05 | 903.483 | 602.658 | 3957 | 66    | YGL147C | 10 |



Supplemental Table 2: DDA-Mascot Peptide Identifications (&lt;5% FDR)

| peptide                          | Mascot score | m/z 2+  | m/z 3+  | scan # | RT    | protein |
|----------------------------------|--------------|---------|---------|--------|-------|---------|
| AAADALSDLEIK                     | 47.66        | 608.825 | 406.219 | 8079   | 57    | YJL026W |
| AADETAFAFYPSK                    | 57.59        | 671.32  | 447.882 | 4976   | 37.9  | YER023W |
| AAEAATDLTYR                      | 26.27        | 641.817 | 428.214 | 3697   | 30    | YOR230W |
| AAEEADADAELADEEDAIHDEL           | 90.4         | 1171.49 | 781.331 | 8468   | 70.6  | YCL043C |
| AAEPHAVSLAWSADGQTLFAGYTDNVIR     | 78.63        | 1480.73 | 987.489 | 11866  | 80.8  | YMR116C |
| AAGANVDNVWADVYAK                 | 86.44        | 832.407 | 555.274 | 9078   | 63.2  | YDL130W |
| AAGSYVEAQHK                      | 30.59        | 662.32  | 441.882 | 1918   | 19.2  | YGL076C |
| AASDAIPPASPK                     | 14.86        | 562.801 | 375.536 | 2236   | 21.1  | YBR011C |
| ADDDSVTIISAGNDK                  | 36.93        | 760.857 | 507.574 | 4781   | 36.7  | YMR116C |
| ADEINQIFDAISYSK                  | 29.39        | 857.42  | 571.949 | 12380  | 84.1  | YKL157W |
| ADHLVEEVLEAR                     | 18.98        | 690.859 | 460.909 | 8070   | 56.9  | YBR121C |
| ADILLDEPTNHLDVSNVK               | 17.89        | 1053.56 | 702.707 | 9415   | 65.3  | YPL226W |
| ADIMELLNHSDSR                    | 27.97        | 750.859 | 500.909 | 8904   | 62.1  | YPR036W |
| ADPAFKPTEK                       | 17.21        | 552.29  | 368.529 | 1463   | 16.4  | YPL131W |
| ADQEYIEIK                        | 42.98        | 562.759 | 375.508 | 2591   | 23.3  | YOR332W |
| ADQILQFSTNPQSK                   | 64           | 788.902 | 526.27  | 6796   | 49    | YGR218W |
| ADTGIAVEGATDAAR                  | 24.85        | 709.349 | 473.235 | 3847   | 31    | YGL008C |
| ADVLTAFLNK                       | 42.84        | 546.308 | 364.541 | 10451  | 71.8  | YJL167W |
| ADVQVALPEGLDAK                   | 44.93        | 713.383 | 475.924 | 7693   | 54.6  | YMR027W |
| ADWGCAEDPSGR                     | 46.93        | 660.767 | 440.847 | 3605   | 29.5  | YGR124W |
| ADWGDDIPTTK                      | 19.76        | 609.785 | 406.859 | 5887   | 43.4  | YGR124W |
| AEALNISGEFFR                     | 53.18        | 677.343 | 451.898 | 9969   | 68.8  | YNL069C |
| AEELNISGEFFR                     | 54.84        | 706.346 | 471.233 | 10023  | 69.1  | YIL133C |
| AEPIDEEVSLAIENGINPR              | 31.28        | 1090.07 | 727.046 | 9644   | 78.8  | YOR133W |
| AEQGEHDENISPAQAAELVGEDLSR        | 16.98        | 1333.12 | 889.083 | 8602   | 71.6  | YAR015W |
| AEQLYEGPADDANCIAIK               | 55.19        | 989.465 | 659.979 | 7231   | 51.7  | YOR133W |
| AEQVFQNVK                        | 53.45        | 531.783 | 354.857 | 3309   | 27.7  | YIL051C |
| AEQVLQNAEK                       | 36.4         | 565.296 | 377.2   | 1872   | 18.9  | YDR129C |
| AESITAVLPYNDNFQAQK               | 27.18        | 969.484 | 646.658 | 9442   | 65.5  | YPR160W |
| AETAAQDVQK                       | 20.57        | 594.796 | 396.867 | 992    | 13.5  | YOL109W |
| AEVAALAAENK                      | 71.79        | 543.793 | 362.864 | 3025   | 25.9  | YGR240C |
| AEVSDVGNAILDADCVMLSGETAK         | 78.35        | 1261.59 | 841.396 | 10818  | 87    | YAL038W |
| AEVSSMPTLIFYK                    | 39.71        | 743.386 | 495.927 | 10527  | 72.3  | YGR209C |
| AFHDEWATQDPR                     | 47.71        | 787.355 | 525.239 | 4280   | 33.6  | YPL061W |
| AFIDEQFPQGISEPIPLGFTSFSPASQNK    | 41.7         | 1606.8  | 1071.54 | 13254  | 103.8 | YGL253W |
| AFPLADAALTQQILDVVQQAANLR         | 33.22        | 1283.7  | 856.138 | 16635  | 127.7 | YEL026W |
| AGAGHSNTLQVSTV                   | 32.89        | 671.341 | 447.897 | 3798   | 30.7  | YAL038W |
| AGANSMIQNVVDSDTISETAAR           | 13.94        | 1125.54 | 750.694 | 9294   | 64.5  | YLL026W |
| AGAPVDALINQIVP LLEK              | 32.27        | 931.043 | 621.031 | 15893  | 107.4 | YHR183W |
| AGELTQEELER                      | 17.69        | 637.815 | 425.546 | 3866   | 31.1  | YML026C |
| AGGAAASLIMPFLDNQVNFK             | 31.3         | 1032.53 | 688.691 | 11993  | 95.1  | YBL041W |
| AGGECITLDQLAVR                   | 76.91        | 751.885 | 501.593 | 8292   | 58.3  | YOL120C |
| AGHQTSAESWGTGR                   | 50.4         | 722.832 | 482.224 | 1722   | 18    | YDR012W |
| AGITWIGPPAEVIDSVGDK              | 14.32        | 963.004 | 642.339 | 11835  | 80.6  | YBR218C |
| AGLLGVESIELPHISK                 | 20.1         | 939.041 | 626.363 | 10565  | 72.5  | YJL130C |
| AGSGTSQLDQLAALQALSSSLNK          | 42.26        | 1130.59 | 754.064 | 10428  | 84.3  | YOL123W |
| AGTAAAAAAALEDAK                  | 81.83        | 686.857 | 458.24  | 7322   | 52.3  | YHR020W |
| AHPDVLTVMLQMLDDGR                | 32.04        | 955.977 | 637.654 | 15462  | 104.5 | YLL026W |
| AIDYVEATANSHSR                   | 26.07        | 767.368 | 511.915 | 3303   | 27.6  | YMR205C |
| AIEMEGLTWGAHQFPIGFGIK            | 22.14        | 1208.13 | 805.756 | 13518  | 91.6  | YAL003W |
| AIEQLNYTPIK                      | 13.47        | 645.359 | 430.575 | 6619   | 47.9  | YER165W |
| AIGSGSEGAQAELLNEWHSSSLTK         | 13.36        | 1249.63 | 833.422 | 10938  | 74.9  | YGR253C |
| AIGNPTNQLVQDIINADSSLR            | 55.59        | 1201.62 | 801.415 | 12674  | 99.8  | YGL106W |
| AIIDCGFEHPSEVQQHTIPQSIHGTDVLCQAK | 20.85        | 1808.37 | 1205.92 | 7624   | 54.1  | YDL084W |
| AILANPSTYEILDPHDFGMK             | 13.71        | 1116.55 | 744.705 | 11296  | 77.2  | YDL131W |
| AIMPIIEGHDVLAQAQSGTGK            | 33.25        | 1068.56 | 712.709 | 8891   | 62    | YKR059W |
| AIVAELETLPDLALVEEK               | 38.64        | 1105.12 | 737.082 | 11778  | 80.2  | YDR388W |
| AIYVDLEPNVIDEVR                  | 63.58        | 872.959 | 582.309 | 10639  | 73    | YML085C |
| ALELYGLDPAK                      | 26.3         | 595.327 | 397.22  | 8665   | 60.6  | YBR263W |
| ALENPTRPFLAILGGAK                | 37.57        | 884.509 | 590.009 | 11095  | 75.9  | YCR012W |
| ALGIMALLDEGETDWK                 | 68.63        | 881.44  | 587.962 | 14350  | 97    | YBR011C |
| ALGLEVDLLLQHWPLCFEK              | 31.57        | 1222.64 | 815.428 | 16858  | 114.1 | YBR149W |

|                                |        |         |         |       |       |           |
|--------------------------------|--------|---------|---------|-------|-------|-----------|
| ALLELQVSK                      | 38.37  | 500.805 | 334.206 | 6976  | 50.1  | YOR133W   |
| ALLESDESLR                     | 17.74  | 566.796 | 378.2   | 12345 | 83.9  | YGR218W   |
| ALLPHLNAIVETNK                 | 33.31  | 817.467 | 545.314 | 7856  | 55.6  | YLR249W   |
| ALTEQAQTLTLSSR                 | 51.34  | 759.91  | 506.942 | 5715  | 42.4  | YLR438W   |
| ALYDTFSVFGDILSSK               | 51.27  | 881.948 | 588.301 | 14578 | 98.6  | YER165W   |
| ALYELLSAADQK                   | 67.1   | 661.354 | 441.238 | 9117  | 63.4  | YER110C   |
| AMYTLSAQDEVFSLAFSPNR           | 31.48  | 1124.04 | 749.696 | 10926 | 87.7  | YMR116C   |
| ANADANEDNNVDEK                 | 62.4   | 759.819 | 506.882 | 925   | 13.1  | YGR124W   |
| ANELLINVK                      | 57.61  | 507.303 | 338.538 | 6428  | 46.7  | YOL086C   |
| ANELVESYR                      | 40.65  | 540.77  | 360.849 | 3780  | 30.5  | YDL082W   |
| ANFEIDLPAK                     | 68.21  | 616.811 | 411.543 | 8382  | 58.9  | YGL245W   |
| ANITDVCIAPPWYTEEQR             | 32.9   | 1131.55 | 754.7   | 9312  | 76.5  | YPL106C   |
| ANNFVYVSGQIPYTPDNKPVQGSISEK    | 53.71  | 1476.74 | 984.829 | 8074  | 56.9  | YIL051C   |
| ANVDTDAIIPK                    | 24.07  | 578.814 | 386.212 | 5341  | 40.1  | YGL009C   |
| APEAEQVLSAAATFPFIAQPATDVEAR    | 28.72  | 1327.18 | 885.12  | 9812  | 80    | YDL082W   |
| APEQFDEVVAIGNK                 | 52.17  | 794.404 | 529.939 | 9819  | 67.8  | YER091C   |
| APFAVVGHATAEQK                 | 74.36  | 713.378 | 475.921 | 3505  | 28.9  | YGR061C   |
| APFDLFESK                      | 49.58  | 527.266 | 351.847 | 9333  | 64.8  | YMR186W   |
| APIEIPLEK                      | 30.63  | 505.3   | 337.202 | 6959  | 50    | YJL080C   |
| APIVAYAELIAAR                  | 41.28  | 679.396 | 453.266 | 11058 | 75.7  | YGL245W   |
| APLEEIVISNDYLNK                | 62.82  | 859.454 | 573.305 | 10217 | 70.3  | YOR332W   |
| APLQTTDLMER                    | 19.44  | 637.824 | 425.552 | 5740  | 42.5  | YDR129C   |
| APLVIADPTYFPEK                 | 62.87  | 780.919 | 520.948 | 9191  | 63.9  | YER136W   |
| APQGPRPGNWDQED                 | 16.71  | 783.85  | 522.903 | 3868  | 31.1  | YJL008C   |
| APTAELQAPPPPSSTK               | 14.41  | 880.465 | 587.312 | 4160  | 32.9  | YPL004C   |
| APTFVVSQDDNNFETEFFPR           | 19.96  | 1204.55 | 803.366 | 11031 | 88.4  | YLR342W   |
| APVYADAIDFIK                   | 40.18  | 661.853 | 441.571 | 10613 | 72.8  | YEL038W   |
| AQFETLTAPLVK                   | 24.69  | 659.374 | 439.919 | 8346  | 58.6  | YJR045C   |
| AQIPVTTTLQGLGSFDQEDPK          | 32.27  | 1123.07 | 749.05  | 8518  | 71    | YMR108W   |
| AQPTEVSSILEER                  | 37.64  | 729.875 | 486.919 | 7374  | 52.6  | YBL099W   |
| AQYDSCDFVADVPPPK               | 27.22  | 904.912 | 603.61  | 7082  | 50.8  | YGR285C   |
| AQYNEIQGWDHLSLLPTFGAK          | 47.4   | 1194.6  | 796.738 | 10344 | 83.7  | YLR044C   |
| ASAPGSVILLENLR                 | 55.05  | 720.414 | 480.612 | 10150 | 69.9  | YCR012W   |
| ASGEIVSINQINEAHPTK             | 46.01  | 954.495 | 636.666 | 5491  | 41    | YMR242C   |
| ASGTVVVADTGDGFGSIAK            | 65.25  | 847.933 | 565.625 | 7461  | 53.1  | YLR354C   |
| ASLNVGNVLPGLSVPEGTIVSNVEEKPGDR | 38.18  | 1524.3  | 1016.54 | 9164  | 75.5  | YIL018W   |
| ASLVPGTVLILLAGR                | 18.41  | 740.466 | 493.98  | 14402 | 97.4  | YLR448W   |
| ASSEENISEAEK                   | 52.14  | 647.294 | 431.865 | 1537  | 16.8  | YGR162W   |
| ASYVGDSSQVEDPGAVGLCEFLK        | 56.07  | 1214.57 | 810.049 | 9349  | 76.8  | YML070W   |
| ATAGDTHLGGEDFDNR               | 73.93  | 838.369 | 559.248 | 3286  | 27.5  | YAL005C   |
| ATDGGAHGVINVSVEAAIEASTR        | 83.72  | 1156.58 | 771.387 | 6653  | 57.5  | YOL086C   |
| ATGQEMDVVSEEPLEIWLAAANYK       | 18.95  | 1297.13 | 865.088 | 13392 | 104.7 | YBR143C   |
| ATHILDFGPGGASGLGVLTHR          | 26.64  | 1038.55 | 692.704 | 9226  | 64.1  | YKL182W   |
| ATNDVEPSTYDSK                  | 56.55  | 713.82  | 476.216 | 2061  | 20.1  | YPR145W   |
| ATNSSLEAYK                     | 33.06  | 542.269 | 361.849 | 2415  | 22.2  | YDR099W   |
| ATSPLLESDSIEK                  | 44.85  | 695.359 | 463.908 | 5684  | 42.2  | YGR253C   |
| ATSSTDEESWFK                   | 20.37  | 694.304 | 463.205 | 6632  | 48    | YKL182W   |
| ATVDEFPLCVHLVSNLEQLSSEALEAAR   | 59.55  | 1614.3  | 1076.53 | 15110 | 116.8 | YLR075W   |
| ATVPVLEQQTIVITR                | 27.83  | 806.457 | 537.974 | 6875  | 49.5  | YGR234W   |
| AVAPIDTDDVLLGQYQK              | 61.84  | 887.965 | 592.312 | 9535  | 66    | YNL241C   |
| AVASSGQELSVEER                 | 70.64  | 731.363 | 487.911 | 3292  | 27.6  | YDR099W   |
| AVDDFLISLDGTANK                | 102.74 | 789.904 | 526.938 | 10995 | 75.3  | YGR254W   |
| AVDDFLLSLDGTANK                | 102.74 | 789.904 | 526.938 | 10995 | 75.3  | YHR174W   |
| AVDLLPELER                     | 34.82  | 634.366 | 423.247 | 10841 | 74.3  | YGL195W   |
| AVEESAEPQVILGEDGKPLSK          | 15.58  | 1134.09 | 756.397 | 7226  | 51.7  | YLL018C   |
| AVEFAQQVQQLPK                  | 29.44  | 786.923 | 524.951 | 8102  | 57.1  | YLR058C   |
| AVEQGFNVKPR                    | 29.94  | 622.841 | 415.563 | 2632  | 23.6  | YBR127C   |
| AVGDNDPIDVLEIGETIAYTGQVK       | 74.44  | 1259.14 | 839.762 | 14278 | 96.6  | YBR011C   |
| AVGGEV GASAALAPK               | 64.15  | 649.359 | 433.242 | 4283  | 33.6  | YEL054C   |
| AVGIDLGTYSVCAHFANDR            | 36.19  | 1084.02 | 723.013 | 10341 | 71.1  | YAL005C   |
| AVGSLTFDENYNLLDTSVAVK          | 75.75  | 1107.55 | 738.702 | 9032  | 74.6  | YNR034W-A |
| AVLEFTPETPSPLIGILENK           | 45.7   | 1084.6  | 723.4   | 13742 | 93    | YGR240C   |
| AVMDLLGSELQNK                  | 16.7   | 709.371 | 473.25  | 9667  | 66.9  | YBR263W   |
| AVQNIILGIYNSGEVCCAGSR          | 25.1   | 1222.59 | 815.395 | 12019 | 81.8  | YOR374W   |
| AVVAGAGTGGTISGISK              | 62.58  | 723.402 | 482.603 | 4264  | 33.5  | YGR155W   |
| AVVESVGAEVDEAR                 | 48.62  | 715.86  | 477.576 | 5213  | 39.3  | YDR382W   |

|                                       |       |         |         |       |       |           |
|---------------------------------------|-------|---------|---------|-------|-------|-----------|
| AWDLLQSGSQNSEFDSFTDILK                | 24.11 | 1307.64 | 872.094 | 13435 | 105   | YFR052W   |
| AWNLNQFQIEADFIGHNSNINTLTASP DGLIASAGK | 74.47 | 1964.98 | 1310.32 | 11772 | 93.6  | YMR116C   |
| AYEELSNTDLEFK                         | 59.66 | 779.867 | 520.247 | 7848  | 55.5  | YLR249W   |
| AYPDLQIAYLDEEPLTEGEEPR                | 43.75 | 1323.13 | 882.425 | 9560  | 78.3  | YLR342W   |
| CCIGFVGGSDLSK                         | 50.11 | 700.321 | 467.216 | 6591  | 47.8  | YFL045C   |
| CCSDVFNQVVK                           | 53.69 | 678.308 | 452.541 | 6147  | 45    | YOL086C   |
| CGDCGSALQGISLTRPR                     | 20.57 | 924.446 | 616.633 | 6465  | 47    | YIL052C   |
| CPFTGLVSIR                            | 50.06 | 575.308 | 383.874 | 8592  | 60.2  | YDR025W   |
| CPLGNPANYPFATIDPEEAR                  | 92.3  | 1116.52 | 744.684 | 8306  | 69.5  | YBR025C   |
| DAGTIAGLNVLR                          | 20.73 | 600.341 | 400.563 | 8762  | 61.2  | YAL005C   |
| DATPIEDVFSFNYPEGIEGPDIK               | 21.08 | 1277.11 | 851.739 | 11931 | 94.6  | YGR162W   |
| DAYEPLYPQQLEILR                       | 13.63 | 924.48  | 616.656 | 15041 | 101.6 | YIL065C   |
| DETLDDWFDNDLSLFP SFGFGFPR             | 31.89 | 1345.61 | 897.406 | 15452 | 119.2 | YBR072W   |
| DEYKPIQLSIVLIVEALLK                   | 21.31 | 986.572 | 658.05  | 15345 | 103.7 | YOR332W   |
| DFDGTGALFFPSEIIVLEALER                | 23.52 | 1219.09 | 813.064 | 15921 | 107.6 | YDR432W   |
| DFKPQALGDTNLFKPIK                     | 16.73 | 966.533 | 644.691 | 8828  | 61.6  | YHR179W   |
| DFLSGTVLYLNSLAK                       | 44.22 | 820.948 | 547.635 | 15022 | 101.5 | YDL055C   |
| DGDDLIYTLPLSFK                        | 26.56 | 798.911 | 532.943 | 13130 | 89    | YNL007C   |
| DGEIMLWNLAAK                          | 60.6  | 680.85  | 454.236 | 11555 | 78.8  | YMR116C   |
| DGYLQNNATEGDAEHITPDNLR                | 26.39 | 1222.06 | 815.042 | 6555  | 47.5  | YLR153C   |
| DHGDVSNQLYAK                          | 31.14 | 673.82  | 449.549 | 2300  | 21.5  | YBR127C   |
| DIEETIVFLQSDPSRPAYVEEIR               | 15.9  | 1353.68 | 902.792 | 10096 | 82    | YDR127W   |
| DIEFSVEELNAATGSK                      | 33.66 | 855.415 | 570.612 | 10139 | 69.8  | YFR044C   |
| DIFPLQNIHVR                           | 13.62 | 676.378 | 451.254 | 9155  | 63.7  | YLR441C   |
| DIFSNDELLSDAYDAK                      | 95.73 | 908.418 | 605.948 | 10923 | 74.8  | YKL056C   |
| DIGGSSTTDFTNEIINK                     | 60.37 | 949.952 | 633.637 | 8351  | 58.7  | YNL037C   |
| DIICQIISSTITGDVVLAAYSHELPR            | 44.44 | 1471.77 | 981.515 | 18231 | 123.9 | YPL131W   |
| DILDVNLNLLK                           | 16.34 | 578.353 | 385.904 | 15953 | 107.8 | YIL002W-A |
| DIYGWTQTSLDDYPIK                      | 32.74 | 957.96  | 638.975 | 11253 | 76.9  | YGL253W   |
| DLAAATAESAPNAAILVISNPVNSTVPIVAQVLK    | 46.67 | 1679.43 | 1119.96 | 14291 | 111   | YKL085W   |
| DLATHGNDIQVPESQVK                     | 14.42 | 982.508 | 655.341 | 6548  | 47.5  | YDR214W   |
| DLSSEVVGQMDAIK                        | 41.25 | 746.372 | 497.917 | 10177 | 70    | YLL026W   |
| DNDLIGIAAK                            | 13.57 | 515.282 | 343.857 | 5693  | 42.2  | YNL128W   |
| DPANLPWASLNIDIAIDSTGVFK               | 50.37 | 1229.14 | 819.76  | 16852 | 129.3 | YJR009C   |
| DPANLPWWSLK                           | 26.73 | 599.317 | 399.88  | 8958  | 62.4  | YJL052W   |
| DPANLPWSSNVDDIAIDSTGVFK               | 96.48 | 1202.09 | 801.732 | 11201 | 89.6  | YGR192C   |
| DPITIVPAEDGSGAGAAVIAALSEK             | 28.41 | 1176.62 | 784.748 | 12890 | 87.4  | YFR053C   |
| DQYVPEVSALDLR                         | 38.57 | 796.402 | 531.27  | 9292  | 64.5  | YML024W   |
| DSSITVAGSSGLSENEIEQMVNDAEK            | 37.76 | 1355.62 | 904.083 | 10188 | 82.6  | YJR045C   |
| DSYVGDEAQSK                           | 15.19 | 599.765 | 400.179 | 1634  | 17.4  | YFL039C   |
| DTDAEGKPLER                           | 34.75 | 615.802 | 410.87  | 1124  | 14.3  | YOR133W   |
| DTPFTIYDGEAVAK                        | 18.08 | 763.872 | 509.584 | 8435  | 59.2  | YMR314W   |
| DVLIPLGEYFQIQDDYLD CFGTPEQIGK         | 18.19 | 1637.29 | 1091.86 | 14489 | 112.4 | YJL167W   |
| DVSDGENYITILLNQLDPALCSK               | 31.21 | 1233.1  | 822.4   | 11543 | 92    | YDR129C   |
| DVTFLNDCVGPVEAAVK                     | 90.75 | 981.977 | 654.987 | 10845 | 74.3  | YCR012W   |
| DYRPAEETEAQAEPVEA                     | 37.32 | 952.929 | 635.622 | 4637  | 35.8  | YNL178W   |
| EAAAESEVDAAAR                         | 43.59 | 709.823 | 473.551 | 2516  | 22.8  | YER036C   |
| EAAAEYAQLLAK                          | 39.08 | 639.34  | 426.563 | 7604  | 54    | YPL090C   |
| EDGIIAQAVDDSR                         | 33.63 | 694.836 | 463.56  | 6927  | 49.8  | YBR088C   |
| EDGTTPFVAIWK                          | 23.13 | 682.348 | 455.235 | 10540 | 72.4  | YKL056C   |
| EDLYQTFAR                             | 30.7  | 571.777 | 381.521 | 7381  | 52.6  | YOR133W   |
| EDTVSWFK                              | 27.69 | 506.243 | 337.831 | 7676  | 54.5  | YGR085C   |
| EAAAPKPPSSAVFSMFGGK                   | 18.59 | 968.977 | 646.321 | 9281  | 64.4  | YDR002W   |
| EEIAALIVNYFSSIVEK                     | 19.24 | 963.017 | 642.347 | 18311 | 124.6 | YOR007C   |
| EEQNIADGVEQK                          | 23.12 | 680.323 | 453.884 | 2444  | 22.4  | YOL109W   |
| EETLNPIIQDTK                          | 30.15 | 700.867 | 467.58  | 6106  | 44.8  | YBR011C   |
| EETYYQESAGVADLITTCAGGR                | 88.21 | 1196.04 | 797.697 | 8855  | 73.4  | YDL022W   |
| EFDETIFNLPK                           | 36    | 676.84  | 451.563 | 10637 | 73    | YKL182W   |
| EFLSNSFAEEPEAKPEVAEEKPKQTAISMNDEDDA   | 28.43 | 1948.86 | 1299.58 | 7089  | 60.7  | YIL041W   |
| EFQIIDTLLPGLQDEV MNIKPVQK             | 35.46 | 1384.75 | 923.502 | 14606 | 98.7  | YGL123W   |
| EGALLTDEV DLENDV DASK                 | 54.37 | 959.468 | 639.981 | 9061  | 63.1  | YLR257W   |
| EGFQIPTNLDAAGTSQAR                    | 23    | 1009.5  | 673.336 | 7500  | 63.7  | YHR143W-A |
| EGGLGPINIPLADTNHLSLR                  | 13.3  | 1087.58 | 725.39  | 11395 | 77.8  | YML028W   |
| EGIPAGWQGLDNGPESR                     | 38.55 | 891.924 | 594.952 | 7878  | 55.7  | YCR012W   |
| EGPTIYVDS DGTR                        | 15.92 | 786.862 | 524.911 | 6064  | 44.5  | YPR103W   |
| EGTVPTDL DQETGLAR                     | 23.12 | 851.418 | 567.948 | 6413  | 46.7  | YGL187C   |



|                                 |       |         |         |       |       |         |
|---------------------------------|-------|---------|---------|-------|-------|---------|
| EHAPYTDELEEDVYLDPLAR            | 19.43 | 1188.06 | 792.373 | 10595 | 72.7  | YPL231W |
| EHGEPLFSSHMLDLSEETDEENISTCVK    | 20.76 | 1617.22 | 1078.48 | 9639  | 66.7  | YKL060C |
| EIADMGVCEVAGAGVVELALHYLNR       | 13.96 | 1379.19 | 919.795 | 14824 | 100.2 | YJL008C |
| EIGDFEDLSTENEK                  | 49.55 | 813.362 | 542.577 | 7180  | 51.4  | YLL018C |
| EIGEDNVFLFGLNSENVEELR           | 27.07 | 1212.09 | 808.396 | 11791 | 93.7  | YPR160W |
| EILENEYQELTSFDEYVAELDSK         | 33.79 | 1382.64 | 922.096 | 12980 | 101.9 | YPR036W |
| EILGTAQSVGCR                    | 45.69 | 645.827 | 430.887 | 4018  | 32    | YEL054C |
| EISEDGADSLNVAMDCISEAFGFER       | 51.89 | 1381.6  | 921.402 | 14423 | 111.9 | YOR007C |
| EITALAPSSMK                     | 16.61 | 574.305 | 383.206 | 5111  | 38.7  | YFL039C |
| EKPETLVLFVDVDTLTPAR             | 18.48 | 1051.06 | 701.044 | 10569 | 72.5  | YFL045C |
| ELAEEGYSGVEVR                   | 66.77 | 719.346 | 479.9   | 5154  | 38.9  | YNL178W |
| ELASQSFINWLGEEK                 | 34.98 | 875.936 | 584.293 | 12259 | 83.3  | YFL045C |
| ELEDFAFPDPTIVK                  | 19    | 861.435 | 574.626 | 10793 | 74    | YBR221C |
| ELGIHTRPVLLGPVSYLFLGK           | 13.94 | 1155.17 | 770.451 | 12928 | 87.7  | YER091C |
| ELGLTVVTDEAIEQMR                | 75.64 | 902.461 | 601.977 | 11805 | 80.4  | YLR359W |
| ELIHQNEVPLVLLSSGVGVTPLLAMLEEQVK | 53.18 | 1678.43 | 1119.29 | 15723 | 121.1 | YGR234W |
| ELISNASDALDK                    | 53.1  | 638.325 | 425.886 | 5367  | 40.3  | YMR186W |
| ELMQQIENFEK                     | 39.88 | 704.842 | 470.231 | 9065  | 63.1  | YGL253W |
| ELNPDITDETNEGK                  | 15.72 | 787.863 | 525.578 | 4094  | 32.5  | YGR162W |
| ELPGVAFLEK                      | 37.94 | 595.327 | 397.22  | 9963  | 68.7  | YCR012W |
| ELPIEIVALINDTVGTLIASYYTDPETK    | 14.22 | 1539.81 | 1026.88 | 16877 | 129.5 | YFR053C |
| ELQDIANPIMSK                    | 24.8  | 679.853 | 453.571 | 6015  | 44.2  | YAL005C |
| ELQEVANPIMSK                    | 33.3  | 679.853 | 453.571 | 6015  | 44.2  | YLL024C |
| ELSASLNLPAASFK                  | 69.12 | 759.912 | 506.944 | 9537  | 66.1  | YMR120C |
| EMIQEVIVEEDLEPFASK              | 95.36 | 1118.04 | 745.696 | 10899 | 87.5  | YPL231W |
| ENTLLGEFDLK                     | 30.96 | 639.832 | 426.891 | 10653 | 73.1  | YNL209W |
| EQAANLIAAGADGLR                 | 58.33 | 735.389 | 490.595 | 7825  | 55.4  | YLR432W |
| EQDVPLIVPVVNPEHLDIVAQK          | 21.98 | 1226.68 | 818.12  | 9454  | 77.5  | YDR158W |
| EQSAQAQWESVLK                   | 44.01 | 787.894 | 525.598 | 8240  | 58    | YGL105W |
| ESGDFLAIDLGGTNLR                | 19.34 | 839.426 | 559.953 | 11005 | 75.3  | YGL253W |
| ESGNYLAIDLGGTNLR                | 41.84 | 846.931 | 564.957 | 9549  | 66.1  | YFR053C |
| ETAEAYLGKPKVK                   | 32.22 | 653.356 | 435.906 | 3408  | 28.3  | YJR045C |
| ETELSLQLSLR                     | 28.96 | 644.859 | 430.242 | 10386 | 71.4  | YCL040W |
| ETFPILVEEK                      | 15.02 | 602.827 | 402.22  | 8421  | 59.1  | YDL055C |
| ETGELEELLEPILAN                 | 14.66 | 835.43  | 557.289 | 15333 | 103.6 | YCL035C |
| ETITEALNLPEANLSEIPSLQDAIQR      | 30.3  | 1433.25 | 955.833 | 13801 | 93.4  | YGR061C |
| ETNPGTDVTVSSVESVLAHL            | 56.7  | 1028.02 | 685.68  | 13362 | 104.5 | YLR109W |
| ETSTDPSYDAFLEK                  | 56.09 | 801.862 | 534.91  | 7480  | 53.3  | YLL050C |
| ETVESSSQTALS                    | 34.67 | 748.36  | 499.242 | 2315  | 21.6  | YOR133W |
| EVARPNNYAGALYDPR                | 14.06 | 903.45  | 602.636 | 5221  | 39.4  | YBR072W |
| EVQGSTLAQLTSK                   | 68.35 | 681.367 | 454.581 | 5518  | 41.2  | YLR441C |
| EVQNSTLAQLTSK                   | 63.94 | 709.878 | 473.588 | 5722  | 42.4  | YML063W |
| EVSDGSGEINIQQFAALLSK            | 52.98 | 1053.54 | 702.695 | 11863 | 94.2  | YBR109C |
| EVVEAVTVVDTPPVVVVGVVGYVETPR     | 13.8  | 1404.77 | 936.851 | 18906 | 129.2 | YOR063W |
| EVYEGETELTPEDAENPLGGYGK         | 55.13 | 1298.6  | 866.069 | 7857  | 66.3  | YDR190C |
| EYIALVDQLIAK                    | 38.44 | 688.395 | 459.266 | 11631 | 79.3  | YGR037C |
| FADGFLIHSGQPVNDFIDTATR          | 72.11 | 1211.1  | 807.733 | 11152 | 76.2  | YNL178W |
| FAEQYSDAAFYK                    | 44.03 | 720.327 | 480.554 | 6835  | 49.3  | YGR209C |
| FAGGDFTTCEGYIPQTGR              | 67.34 | 1039.47 | 693.314 | 6158  | 53.7  | YHR020W |
| FAIPAINVTSSSTAVAALEAAR          | 129.6 | 1080.59 | 720.727 | 11082 | 88.8  | YKL060C |
| FASDPGCAFTK                     | 50.62 | 600.771 | 400.85  | 4509  | 35    | YLR109W |
| FCQEHDILVEAYSPLGPLQK            | 31.67 | 1172.59 | 782.06  | 10092 | 69.5  | YDL124W |
| FDAKPAYPGHVQQGGLPSIDR           | 17.75 | 1175.6  | 784.069 | 5908  | 43.6  | YMR205C |
| FDATNTSVCK                      | 22.59 | 571.761 | 381.51  | 2196  | 20.9  | YGR054W |
| FDDGAGGDNEVQR                   | 38.05 | 690.295 | 460.532 | 2031  | 19.9  | YKL145W |
| FDDMELDENLLR                    | 59.52 | 755.348 | 503.901 | 10078 | 69.4  | YKR059W |
| FDDPPEWQEIIK                    | 35.85 | 758.87  | 506.249 | 10349 | 71.1  | YDR091C |
| FDGSLNVDLNEFQTNLVPYPR           | 57.93 | 1219.6  | 813.404 | 10836 | 87.1  | YML124C |
| FDKPFVMDTSYPAR                  | 24.41 | 837.403 | 558.605 | 7161  | 51.3  | YGL253W |
| FDLALEYGNLDVALDEAK              | 46.78 | 998.499 | 666.002 | 12615 | 85.7  | YDL145C |
| FDQYLDAENK                      | 28.46 | 621.785 | 414.859 | 4355  | 34.1  | YLR314C |
| FDVGALMALHGEESGEEK              | 61.74 | 923.936 | 616.293 | 9375  | 65    | YLR441C |
| FEASQVTEK                       | 38.81 | 519.759 | 346.842 | 2327  | 21.7  | YDL136W |
| FEDIHPYSVSYSWDK                 | 39.54 | 936.926 | 624.953 | 8226  | 57.9  | YPL106C |
| FEELCADLFR                      | 67.93 | 650.306 | 433.873 | 10003 | 69    | YAL005C |
| FEENVSDDTTATPK                  | 22.67 | 826.886 | 551.593 | 4440  | 34.6  | YOL139C |

|                                |       |         |         |       |       |         |
|--------------------------------|-------|---------|---------|-------|-------|---------|
| FEEWIVPILDK                    | 56.58 | 694.877 | 463.587 | 12668 | 86    | YHR068W |
| FELSGIPPAPR                    | 46.21 | 592.327 | 395.22  | 8166  | 57.5  | YAL005C |
| FENELDSFFTLFR                  | 18.97 | 832.901 | 555.603 | 15794 | 106.7 | YKL035W |
| FEQASESEPTTVSYEIAGNSPAER       | 27.48 | 1357.11 | 905.079 | 6757  | 48.8  | YJR104C |
| FEQVPDSLDDQIFVCEK              | 34.26 | 1034.98 | 690.323 | 8116  | 68.1  | YDL097C |
| FGDFGGQYVPEALHACL              | 50.61 | 1018.99 | 679.66  | 9936  | 68.5  | YGL026C |
| FGDPETQAVLSLLDDQTDLAQVFLAAAEHR | 45.53 | 1635.82 | 1090.88 | 18237 | 124   | YGL234W |
| FHAAQLPTETLEVTQPGVLCR          | 36.48 | 1292.15 | 861.767 | 8870  | 61.9  | YCL030C |
| FIETYVQVNPSPK                  | 45    | 776.904 | 518.272 | 6622  | 47.9  | YGL206C |
| FISEVENTDPTQER                 | 54.89 | 832.892 | 555.597 | 4635  | 35.8  | YKL085W |
| FNDTVNQLLEK                    | 48.79 | 660.843 | 440.898 | 7777  | 55.1  | YHR108W |
| FNNQFEPCCAGNITNYLLEK           | 13.89 | 1136.54 | 758.028 | 9541  | 78.1  | YMR109W |
| FNVEYFAK                       | 24.68 | 509.256 | 339.84  | 7765  | 55    | YLR448W |
| FPGWDFETEIDPELLR               | 75.21 | 1047    | 698.334 | 11789 | 93.7  | YPL131W |
| FPILTQEDLFSIEK                 | 14.6  | 890.972 | 594.317 | 12669 | 86    | YDR129C |
| FQPGTSNETPEETYQR               | 40.85 | 942.424 | 628.618 | 3716  | 30.1  | YOR027W |
| FQPQDSTTNPSLILAAAK             | 58.38 | 951.502 | 634.67  | 8634  | 60.4  | YLR354C |
| FQYIAISQSDADSESK               | 37.15 | 974.933 | 650.291 | 6716  | 48.5  | YLR109W |
| FSAETLSELIR                    | 43.32 | 633.34  | 422.563 | 11020 | 75.4  | YKL182W |
| FSDALNDANECVK                  | 74.64 | 741.83  | 494.889 | 4627  | 35.7  | YOR027W |
| FSEAAFLGSTYGLGDDAVNDIVTK       | 34.7  | 1245.61 | 830.739 | 10886 | 87.4  | YGL137W |
| FSEFLTLLYDEIVSTK               | 16.11 | 1003.52 | 669.35  | 15908 | 107.5 | YNL117W |
| FSSILDSIDVDQPEWSELTSVEEAK      | 38.23 | 1412.67 | 942.119 | 12127 | 96    | YJR109C |
| FSVSPVVQVAVEVK                 | 46.74 | 744.427 | 496.62  | 9907  | 68.4  | YOR133W |
| FSYQDLETYYQTGPYDVVR            | 53.67 | 1229.56 | 820.045 | 8438  | 70.4  | YAR071W |
| FTGCNVIGLNNNDYQIAK             | 51.39 | 1020.99 | 680.998 | 6636  | 57.3  | YML008C |
| FTIEEVGAPTSSEEGDITMR           | 35.54 | 1085    | 723.672 | 7125  | 61    | YJL080C |
| FTLEVVDVAVDAIGPEK              | 22.81 | 901.483 | 601.324 | 14673 | 99.2  | YHR179W |
| FTVSAIYSDLPQQER                | 50.67 | 877.441 | 585.297 | 9389  | 65.1  | YKR059W |
| FTYVTEITDPK                    | 21.06 | 657.814 | 438.879 | 3926  | 31.4  | YDR188W |
| FVEPIDDCPAGNIIGLVGDQFLK        | 32.63 | 1372.22 | 915.151 | 16505 | 111.6 | YOR133W |
| FVQGLLQNAANAIAEK               | 84.84 | 822.939 | 548.962 | 7890  | 55.8  | YJL177W |
| FYDILGVPVATDVEIK               | 16.13 | 940.506 | 627.34  | 12541 | 85.2  | YNL064C |
| GAAGIWTCSCK                    | 41.09 | 685.786 | 457.526 | 4644  | 35.8  | YPR043W |
| GAAYVLGAGQVYVFGSVGK            | 21.17 | 921.991 | 614.996 | 10507 | 72.1  | YJR105W |
| GAGSIFTSR                      | 42.36 | 567.289 | 378.528 | 2905  | 25.2  | YIL018W |
| GAIVGPDLAVLALVIVK              | 47.8  | 824.524 | 550.018 | 16273 | 110   | YPL090C |
| GALATYGLTIDDLGVASFHGTSTK       | 33.92 | 1198.11 | 799.076 | 10987 | 75.2  | YPL231W |
| GASDGLYVPHSENR                 | 46.4  | 779.866 | 520.246 | 3125  | 26.5  | YPL131W |
| GATLVVGGDGR                    | 41.03 | 501.272 | 334.517 | 2826  | 24.7  | YMR105C |
| GATQNNLDDIER                   | 40.48 | 673.321 | 449.216 | 3545  | 29.1  | YJL008C |
| GATYKGPTNQGVNELK               | 24.16 | 838.934 | 559.625 | 2438  | 22.4  | YLR029C |
| GCFDEEGYQK                     | 25.66 | 616.748 | 411.501 | 3016  | 25.9  | YHR068W |
| GDAIHATSSSSISK                 | 15.5  | 680.839 | 454.228 | 1284  | 15.3  | YDR238C |
| GDIPGVVAFFGGLVAQEVLK           | 30.29 | 1008.56 | 672.71  | 16804 | 129   | YKL210W |
| GDLGIEIPAPEVLAVQK              | 31.5  | 874.993 | 583.665 | 11140 | 76.2  | YAL038W |
| GDTYYSIQGFK                    | 28.02 | 607.806 | 405.54  | 7107  | 51    | YAL038W |
| GDVEEYQYLR                     | 53.29 | 636.299 | 424.535 | 5837  | 43.1  | YBR126C |
| GEALLVVLSSVTEANIHK             | 67.14 | 978.075 | 652.386 | 17488 | 118.5 | YOR369C |
| GEEILSGAQR                     | 16.92 | 530.275 | 353.852 | 2926  | 25.3  | YLL018C |
| GEELINPISDLMQADR               | 39.41 | 958.457 | 639.307 | 12756 | 86.6  | YGL037C |
| GEIGPFASPK                     | 30.41 | 501.766 | 334.847 | 5419  | 40.6  | YLR153C |
| GELTMNLPK                      | 28.58 | 501.768 | 334.848 | 5419  | 40.6  | YJR046W |
| GEQINIPLLPGEQTGPLAK            | 63.56 | 988.047 | 659.033 | 10510 | 72.2  | YJR148W |
| GFDIPNVEGHVPLLQNEISK           | 48.69 | 1210.63 | 807.42  | 11518 | 78.6  | YFR053C |
| GFDQSLAQSLDTITSK               | 46.75 | 855.931 | 570.956 | 10860 | 74.4  | YKL157W |
| GFDQTLAQALDITR                 | 55.85 | 774.904 | 516.939 | 12652 | 85.9  | YHR047C |
| GFEIGSGFQGVSVPGSK              | 36.1  | 826.918 | 551.614 | 9420  | 65.3  | YGL148W |
| GFEVHWAENK                     | 42.1  | 690.323 | 460.551 | 6974  | 50.1  | YGR240C |
| GFFSFATQK                      | 30.61 | 516.761 | 344.843 | 8995  | 62.7  | YER091C |
| GFGFVCFSTPEEATK                | 53.67 | 838.885 | 559.592 | 10181 | 70.1  | YER165W |
| GFLESLIQLHQK                   | 18.44 | 770.928 | 514.288 | 10554 | 72.4  | YGR061C |
| GFLSDLPDFEK                    | 38.68 | 634.314 | 423.212 | 11223 | 76.7  | YLR340W |
| GFPGLIPPNSTLVFDVELLK           | 26.21 | 1078.6  | 719.405 | 13578 | 106   | YNL135C |
| GGDEAAIAASNQDLK                | 29.28 | 730.355 | 487.239 | 3570  | 29.3  | YMR012W |
| GGIPLVFPVFGK                   | 17.1  | 615.866 | 410.913 | 12758 | 86.6  | YMR099C |

|                                      |       |         |         |       |       |         |
|--------------------------------------|-------|---------|---------|-------|-------|---------|
| GGLTYNDFLVLPLGLVDFPSSEVSLQTK         | 35.45 | 1448.75 | 966.171 | 13870 | 108.1 | YLR432W |
| GGSLGDAGGASDR                        | 29.44 | 560.255 | 373.839 | 1194  | 14.7  | YDL126C |
| GGTLISYDGGQVR                        | 30.76 | 633.328 | 422.554 | 5558  | 41.4  | YKL035W |
| GGVEAQQAENEEK                        | 73.72 | 694.818 | 463.548 | 1131  | 14.4  | YOR184W |
| GGYFDSIGIIR                          | 38.06 | 599.317 | 399.88  | 9851  | 68    | YNL241C |
| GGYPAPQGPYYCGVGAGK                   | 40.19 | 899.914 | 600.279 | 5773  | 42.7  | YPR035W |
| GIDVQQVSLVINYDLPANK                  | 88.19 | 1043.56 | 696.044 | 9614  | 78.6  | YKR059W |
| GIEAAGGSADIYQVEETLSPEVVK             | 15.97 | 1231.62 | 821.415 | 9243  | 76    | YDR032C |
| GINSSYAVWVNDVTGK                     | 70.44 | 805.894 | 537.598 | 8887  | 62    | YLR355C |
| GISELGIYPAVDPLDSK                    | 38.72 | 887.467 | 591.98  | 10683 | 73.3  | YJR121W |
| GISNEGQNASIK                         | 61.52 | 609.31  | 406.542 | 1621  | 17.4  | YKL060C |
| GLEVLQTIDR                           | 18.5  | 572.322 | 381.884 | 8219  | 57.8  | YIL137C |
| GLFGNTFVDLGDDEFTVLDPTGEEPR           | 54.24 | 1363.15 | 909.105 | 13536 | 105.8 | YKL210W |
| GLGGILLNPITGR                        | 30.71 | 640.888 | 427.594 | 10623 | 72.9  | YEL047C |
| GLGNPLLYDGVER                        | 27.43 | 701.87  | 468.249 | 8384  | 58.9  | YPR191W |
| GLIAGGGAPEIEISR                      | 47.22 | 720.396 | 480.6   | 7705  | 54.6  | YDL143W |
| GLILVGGYGTR                          | 49.37 | 553.322 | 369.217 | 7648  | 54.3  | YDL055C |
| GLINDPDVNNFTNINK                     | 76.53 | 894.45  | 596.636 | 8455  | 59.3  | YBR249C |
| GLLGLSLVEAK                          | 49.13 | 550.34  | 367.229 | 10393 | 71.4  | YGL068W |
| GLLVPTQTTDQELQHRL                    | 14.22 | 975.026 | 650.353 | 8114  | 57.2  | YPR016C |
| GLNINENADFIK                         | 44.78 | 738.87  | 492.916 | 7527  | 53.5  | YNL189W |
| GLPESAVQAGQETR                       | 26.95 | 721.865 | 481.579 | 3831  | 30.9  | YBL076C |
| GLQTVVVEEDA                          | 14.57 | 580.296 | 387.2   | 6713  | 48.5  | YDL075W |
| GLSAVAQAESMK                         | 68.51 | 596.306 | 397.873 | 5193  | 39.2  | YNL178W |
| GLSVVDTYAILSNNK                      | 78.08 | 740.406 | 493.94  | 10182 | 70.1  | YJL167W |
| GLTPSQIGVLLR                         | 56.53 | 627.382 | 418.591 | 10000 | 68.9  | YDR064W |
| GLVSDPAGSDALNVLK                     | 41.09 | 778.42  | 519.282 | 8923  | 62.2  | YML126C |
| GMDIAYEEAALGYK                       | 62.69 | 765.861 | 510.91  | 9127  | 63.5  | YPR062W |
| GMGLLTAIVIDPSK                       | 55.57 | 707.902 | 472.271 | 11788 | 80.3  | YLR438W |
| GNLAAFVEQKPEAK                       | 38.14 | 751.404 | 501.272 | 5545  | 41.3  | YPL226W |
| GNPTVEVELTTEK                        | 83.97 | 708.864 | 472.912 | 5470  | 40.9  | YGR254W |
| GNQLNANTELER                         | 19.24 | 679.837 | 453.56  | 3305  | 27.6  | YER125W |
| GNVGFVFTNEPLTEIK                     | 29.78 | 882.962 | 588.977 | 10985 | 75.2  | YLR340W |
| GNWKGKPGDEINDLIDSGEIK                | 40.8  | 1079.03 | 719.687 | 10223 | 70.3  | YLR327C |
| GNYPINAVTTMAETAIVAEQAIYLPNYDDMR      | 45.94 | 1758.34 | 1172.57 | 16828 | 129.1 | YAL038W |
| GPLVVYAEDNGIVK                       | 66.49 | 737.401 | 491.936 | 8034  | 56.7  | YDR012W |
| GQCLATLLGHNDWVWSQVR                  | 58.25 | 1027.52 | 685.346 | 8367  | 69.9  | YMR116C |
| GQDYVPAFDVAPDWESYDYAK                | 14.24 | 1218.54 | 812.694 | 9886  | 80.5  | YPL048W |
| GQHLADILNSASR                        | 33.86 | 691.363 | 461.244 | 5961  | 43.9  | YOR007C |
| GQNDDDLIR                            | 28.98 | 523.249 | 349.168 | 2833  | 24.8  | YGL206C |
| GQTYSAPAIGGFVLNK                     | 50.78 | 840.441 | 560.63  | 9527  | 66    | YJR045C |
| GQVVSEEQRPQTPLFTVK                   | 60.46 | 986.528 | 658.021 | 6308  | 46    | YOR133W |
| GRPYTGWVDSK                          | 22.87 | 633.317 | 422.547 | 3828  | 30.8  | YPL231W |
| GSGCVPINNLMEDAATAEVS                 | 23.93 | 1096.01 | 731.009 | 8528  | 71    | YNL117W |
| GSIDEQHPR                            | 58.58 | 519.752 | 346.837 | 864   | 12.7  | YLR044C |
| GSIDITTTNSYEK                        | 35.29 | 714.846 | 476.9   | 4447  | 34.6  | YLR259C |
| GSKPGQQVDLEENEIR                     | 19.58 | 899.95  | 600.302 | 3890  | 31.2  | YER133W |
| GSPFCQCNIGVGQVIK                     | 75.29 | 802.417 | 535.28  | 8333  | 58.5  | YNL135C |
| GSSSLYTLVINDAGK                      | 56.61 | 762.899 | 508.935 | 9605  | 66.5  | YLR325C |
| GSTLIVVPPFNQGSK                      | 19.36 | 723.901 | 482.937 | 8553  | 59.9  | YPL231W |
| GTDYDFYEAWGPVFEAEAR                  | 60.17 | 1111.99 | 741.66  | 11627 | 92.6  | YGR285C |
| GTGLMSANNIAEGIEK                     | 63.21 | 859.443 | 573.298 | 9528  | 66    | YPL231W |
| GTISAEEYEK                           | 22.95 | 563.767 | 376.18  | 2797  | 24.6  | YER091C |
| GTITWIAPAGEYTLDEK                    | 62.17 | 932.97  | 622.316 | 10053 | 69.3  | YDL185W |
| GTLEGHNGWVTSLSATSAGQPNLLLSASR        | 36.42 | 1419.23 | 946.489 | 10980 | 75.2  | YMR116C |
| GTVVDPISLIQAVK                       | 18.83 | 720.427 | 480.62  | 11785 | 80.3  | YIL074C |
| GTAAVVSPEK                           | 21.39 | 511.761 | 341.51  | 1844  | 18.7  | YGL202W |
| GVAINFVTNEDVGAMR                     | 48.61 | 846.922 | 564.951 | 9030  | 62.9  | YKR059W |
| GVETLAEVAATLGPK                      | 49.73 | 763.925 | 509.619 | 13269 | 89.9  | YLR259C |
| GVEVLPVDFIADAFSADANTK                | 99.27 | 1196.13 | 797.753 | 15385 | 118.7 | YCR012W |
| GVFGYGFEEPSAIQQR                     | 89.02 | 892.934 | 595.625 | 9364  | 65    | YKR059W |
| GVIFYESHGK                           | 35.61 | 568.79  | 379.529 | 3666  | 29.8  | YOL086C |
| GVILYPPGTGK                          | 15.05 | 579.829 | 386.889 | 5732  | 42.5  | YGL048C |
| GVLESISDLSLSPKPHNFEDCIK              | 35.86 | 1231.6  | 821.4   | 9569  | 66.3  | YKL210W |
| GVLGYTEDAVVSSDFLGDSSHSSIFDASAGIQLSPK | 66.13 | 1785.37 | 1190.58 | 15646 | 120.6 | YGR192C |
| GVLGYTEDAVVSSDFLGDSSNFDAAGIQLSPK     | 16.89 | 1765.86 | 1177.58 | 15973 | 122.9 | YJR009C |

|                                     |       |         |         |       |       |         |
|-------------------------------------|-------|---------|---------|-------|-------|---------|
| GVLGYTEDAVVSSDFLGDTHASIFDASAGIQLSPK | 23.86 | 1784.38 | 1189.92 | 19021 | 151.7 | YJL052W |
| GVLLAADLGGTNR                       | 59.58 | 702.386 | 468.593 | 9465  | 65.6  | YCL040W |
| GVLLYGPPGTGK                        | 15.05 | 579.829 | 386.889 | 5732  | 42.5  | YDR394W |
| GVLSCDLVGFHTYDYAR                   | 23.69 | 986.965 | 658.312 | 9249  | 64.3  | YBR126C |
| GVLVVPGSWFK                         | 25.41 | 594.842 | 396.897 | 11260 | 76.9  | YGL202W |
| GVMNAVNNVNNVIAAAFVK                 | 94.92 | 973.02  | 649.016 | 13201 | 89.5  | YHR174W |
| GVNLPGTDVLDLPALSEK                  | 65.62 | 862.957 | 575.64  | 10145 | 69.9  | YAL038W |
| GVPPYVTHDGR                         | 35.86 | 600.312 | 400.544 | 3179  | 26.9  | YJR145C |
| GVTDDTGPLLSWINVVDAFK                | 59.76 | 1074.05 | 716.372 | 15403 | 118.8 | YFR044C |
| GVVDSDELPLNLSR                      | 40.94 | 757.396 | 505.267 | 8688  | 60.8  | YMR186W |
| GWGEAAHQPADFTWAPSLAVPK              | 30.1  | 1168.58 | 779.387 | 8595  | 71.5  | YPL028W |
| GWYGQYTLDCNTR                       | 14.61 | 786.349 | 524.568 | 6326  | 46.1  | YPL154C |
| GVDSTGAIADGDEADSTFIYK               | 46.54 | 1119.51 | 746.674 | 7694  | 65.1  | YKL104C |
| GYLADDIDADSLEDIYTSHEAIR             | 79.45 | 1327.12 | 885.08  | 10270 | 83.2  | YPL131W |
| GYLRPETAQGGQLNFNK                   | 27.89 | 992.008 | 661.674 | 7947  | 56.1  | YBR121C |
| GYSVCDIFTEDELVR                     | 96.68 | 959.43  | 639.956 | 11053 | 75.6  | YBR092C |
| GYSFSTAER                           | 20.41 | 559.759 | 373.509 | 3848  | 31    | YFLO39C |
| GYTCQFVDMVLPNTALK                   | 22.66 | 978.981 | 652.99  | 11682 | 79.6  | YKL182W |
| GYWGTNLGQPHSLATK                    | 19.22 | 865.436 | 577.293 | 6417  | 46.7  | YGL123W |
| HDLVDYLIDQIELR                      | 19.16 | 871.46  | 581.309 | 15098 | 102   | YOL090W |
| HDWIVLDVPLTR                        | 19.85 | 732.404 | 488.605 | 14795 | 100   | YHR035W |
| HELSSLADVINDAFGTAHR                 | 48.9  | 1108.54 | 739.363 | 10395 | 71.4  | YCR012W |
| HFIDELNK                            | 25.01 | 508.264 | 339.178 | 3757  | 30.4  | YFR053C |
| HGENSLSSGTSQDSLRL                   | 56.11 | 894.43  | 596.622 | 4202  | 33.1  | YGR240C |
| HGIPLISIEELAQYLK                    | 21.95 | 912.517 | 608.68  | 14346 | 97    | YDR487C |
| HGIPVVVDNTFGAGGYFCQPIK              | 15.73 | 1188.59 | 792.732 | 10074 | 69.4  | YLR303W |
| HGLVGLLESLLK                        | 24.12 | 583.351 | 389.236 | 9237  | 64.2  | YCL030C |
| HIDASGSINR                          | 21.87 | 535.273 | 357.184 | 1135  | 14.4  | YOL121C |
| HIDDFYDSYNK                         | 23.19 | 708.807 | 472.874 | 5160  | 39    | YGR167W |
| HIDFAPTSPPGGARPR                    | 13.13 | 891.955 | 594.973 | 6385  | 46.5  | YPL081W |
| HIDTGMGFER                          | 18.32 | 581.769 | 388.182 | 3709  | 30.1  | YOR335C |
| HIEPALAFQLELGR                      | 22.57 | 797.441 | 531.963 | 9931  | 68.5  | YNR016C |
| HIGGNDLQELR                         | 40.5  | 683.839 | 456.228 | 3872  | 31.1  | YCL035C |
| HITINDLPVGR                         | 42.47 | 617.849 | 412.235 | 5810  | 42.9  | YML028W |
| HIYQSAAGLK                          | 21.45 | 579.817 | 386.88  | 2166  | 20.7  | YOR374W |
| HLEDNTLLISGPFK                      | 53.52 | 792.425 | 528.619 | 8708  | 60.9  | YML073C |
| HLEDNTLLVTGPFK                      | 48.61 | 792.425 | 528.619 | 8708  | 60.9  | YLR448W |
| HLEGISDADIAK                        | 19.63 | 634.828 | 423.554 | 4081  | 32.4  | YKL152C |
| HLGSLFSDAVQTASVQWFER                | 26.98 | 1139.57 | 760.047 | 11361 | 90.7  | YLR359W |
| HLGVVGEICNIQYALNPVSK                | 19.53 | 1049.54 | 700.03  | 8119  | 57.2  | YJL130C |
| HLTTPFQLSSEVLSHIEDDSTGLR            | 35.38 | 1398.21 | 932.478 | 13400 | 90.8  | YCL040W |
| HMVFYNSGPASGSSLDHK                  | 40.68 | 967.447 | 645.3   | 4196  | 33.1  | YCL050C |
| HNDPFYFEK                           | 17.75 | 598.772 | 399.517 | 5516  | 41.2  | YGL148W |
| HNLEFINILTDGLLNEECGPEWQGMK          | 23.29 | 1586.74 | 1058.16 | 12126 | 96    | YGR094W |
| HNVLLIVDEIQTGIGR                    | 32.26 | 889.002 | 593.004 | 11548 | 78.8  | YLR438W |
| HSEFVAYPIQLLVTK                     | 36.42 | 872.985 | 582.326 | 11163 | 76.3  | YMR186W |
| HSEFVAYPIQLVTK                      | 31.43 | 865.977 | 577.654 | 9792  | 67.6  | YPL240C |
| HSGNIQLDEIIEIAR                     | 72.88 | 854.455 | 569.972 | 10239 | 70.4  | YEL054C |
| HTLDIINVLTDQNPQIVVDAITNTGPR         | 74.48 | 1528.82 | 1019.55 | 18684 | 127.4 | YJR123W |
| HVSPAGAAVGIPLSDVEK                  | 72.05 | 873.973 | 582.984 | 6682  | 48.3  | YMR120C |
| HVVFGVVDGYDIVK                      | 70.17 | 838.438 | 559.294 | 8900  | 62.1  | YDR155C |
| HWGGGILGNK                          | 29.77 | 519.778 | 346.854 | 4414  | 34.4  | YHL033C |
| HWNAIDESTR                          | 36.52 | 614.789 | 410.195 | 2834  | 24.8  | YER110C |
| IADATEDLQNDASR                      | 26    | 803.371 | 535.917 | 3281  | 27.5  | YDR091C |
| IADISLAAFGR                         | 37.38 | 567.319 | 378.549 | 9503  | 65.8  | YER043C |
| IAEFSAISFPYGAK                      | 43.38 | 750.89  | 500.929 | 10315 | 70.9  | YPL160W |
| IAFADAGTVEDANFDESANAAAILR           | 53.39 | 1355.63 | 904.091 | 8384  | 70    | YPL160W |
| IAGVYHPSNNELVR                      | 21.92 | 834.447 | 556.634 | 5073  | 38.5  | YBL072C |
| IATSQEAIDQYNAQATGDR                 | 15.08 | 1026.49 | 684.659 | 3906  | 37    | YBR269C |
| ICDQVSDAILDACLAEDPHSK               | 28.66 | 1179.04 | 786.363 | 8978  | 62.6  | YLR180W |
| ICLPTFDPEELITLIGK                   | 22.26 | 980.029 | 653.688 | 16613 | 112.3 | YJR148W |
| IDIDVLAPLSSFAATAHK                  | 35.06 | 935.009 | 623.675 | 12590 | 85.5  | YLR359W |
| IDQSFELSGENLSALSR                   | 44.41 | 933.466 | 622.646 | 11052 | 75.6  | YKL193C |
| IDVAVDSTGVFK                        | 37.53 | 625.835 | 417.559 | 7579  | 53.9  | YJL052W |
| IEAALS DALAALQIEDPSADELR            | 16.58 | 1206.12 | 804.415 | 11994 | 95.1  | YDL229W |
| IEALEFADDAAK                        | 55.8  | 646.822 | 431.55  | 7669  | 54.4  | YPL160W |

|                               |        |         |         |       |       |         |
|-------------------------------|--------|---------|---------|-------|-------|---------|
| IEDDPFENLEDTDDIFQK            | 80.32  | 1091.99 | 728.327 | 10151 | 82.3  | YFR053C |
| IEELQYDSTLSLPSSEFSK           | 50.26  | 1087.03 | 725.023 | 8210  | 68.8  | YBR088C |
| IEEVIDLILR                    | 69.96  | 606.864 | 404.911 | 12549 | 85.2  | YHR087W |
| IEFGAASDGDGDR                 | 57.68  | 655.286 | 437.193 | 3854  | 31    | YMR105C |
| IEGVATPQDAQFYLGK              | 26.31  | 868.946 | 579.633 | 8526  | 59.8  | YPL143W |
| IENQQGVNNFDEILK               | 47.25  | 880.944 | 587.632 | 8549  | 59.9  | YAL038W |
| IEQLGTEIAAIPATIDK             | 40.18  | 956.517 | 638.014 | 10429 | 71.6  | YDL160C |
| IEQLHPPFFAQLR                 | 26.14  | 798.438 | 532.628 | 9619  | 66.6  | YIL125W |
| IEQLYHEYESIAK                 | 30.15  | 876.428 | 584.621 | 6760  | 48.8  | YJL167W |
| IEQNRPDDGVY                   | 14.13  | 653.307 | 435.874 | 2757  | 24.3  | YDR070C |
| IESSVESQFSAGR                 | 64.97  | 698.839 | 466.228 | 4695  | 36.2  | YBL072C |
| IFEGIPPPYDK                   | 28.95  | 638.335 | 425.892 | 7357  | 52.5  | YNL069C |
| IFESILNSPSSK                  | 19.87  | 661.354 | 441.238 | 9118  | 63.4  | YJL080C |
| IFVLDEADNMLDQQGLGDQCIR        | 20.34  | 1275.6  | 850.737 | 10573 | 85.3  | YOR046C |
| IGCVLAQCLFDEDIVNEIAEHNAFFTK   | 24.45  | 1577.25 | 1051.84 | 13434 | 105   | YPR041W |
| IGDENLTDIINTR                 | 31.97  | 737.381 | 491.923 | 8909  | 62.1  | YOL059W |
| IGEFESSFLSYLK                 | 15.77  | 760.388 | 507.261 | 12837 | 87.1  | YBL099W |
| IGGIGTVPVGR                   | 43.72  | 513.309 | 342.542 | 4965  | 37.8  | YPR080W |
| IGGLLKPELDD                   | 19.69  | 628.84  | 419.563 | 7131  | 51.1  | YGR218W |
| IGICYEPPSVIPSELANVDR          | 30.67  | 1158.58 | 772.723 | 8659  | 72    | YML124C |
| IGLDCASSEFFK                  | 64.05  | 687.324 | 458.552 | 9261  | 64.3  | YGR254W |
| IGPDVVIGPNVTIGDGVR            | 53.27  | 889.494 | 593.332 | 9400  | 65.2  | YDL055C |
| IGPQGALLGCDAAAGQIVK           | 74.3   | 884.475 | 589.986 | 8289  | 58.3  | YNL134C |
| IGQEVDGEAVGDEFK               | 57.76  | 796.876 | 531.586 | 6285  | 45.9  | YPL090C |
| IGSEVYHNLK                    | 38.09  | 580.309 | 387.208 | 2692  | 23.9  | YGR254W |
| IGSLDTLIVESEELSK              | 15.69  | 866.964 | 578.312 | 12427 | 84.4  | YKL080W |
| IHLEGSEAPQEPK                 | 43.99  | 717.865 | 478.912 | 2618  | 23.5  | YGL245W |
| IHPIGELSSEEEMLQK              | 54.81  | 984.983 | 656.991 | 8067  | 56.9  | YKL085W |
| IHQYLFQEGVVAVK                | 63.03  | 815.951 | 544.303 | 7288  | 52.1  | YMR230W |
| IIAAIPNPEDVVAISSR             | 32.51  | 882.996 | 589     | 10704 | 73.4  | YLR048W |
| IIDDDVPTILQGAK                | 46.48  | 749.412 | 499.943 | 8785  | 61.4  | YLL026W |
| IIEEEQEDDALVQDLLK             | 56.88  | 1000.51 | 667.34  | 10092 | 81.9  | YHR108W |
| IIIDHDASLPSQYQK               | 23.12  | 928.973 | 619.651 | 6075  | 44.6  | YGL206C |
| IIILQGLNETSTNAYR              | 32.62  | 968.013 | 645.678 | 10530 | 72.3  | YKL080W |
| IIEVTLDALENILK                | 31.08  | 792.466 | 528.647 | 15114 | 102.1 | YNL189W |
| IIFGTQSDAFQEDR                | 57.09  | 813.892 | 542.93  | 7728  | 54.8  | YLR027C |
| IINEPTAAAIYGLDK               | 26.91  | 830.451 | 553.97  | 9351  | 64.9  | YAL005C |
| IINEPTAAAIYGLGAGK             | 83.49  | 865.478 | 577.321 | 9966  | 68.7  | YNL209W |
| IINIEFVDDWWLGELEK             | 30.57  | 1117.55 | 745.372 | 13706 | 106.9 | YCR088W |
| IITEAVEIEK                    | 17.9   | 572.827 | 382.22  | 5355  | 40.2  | YGR180C |
| IIVDAYGGASSVGGGAFSGK          | 106.29 | 906.96  | 604.976 | 7646  | 54.3  | YLR180W |
| IIVHTDTEPLINAFLK              | 24.07  | 948.035 | 632.359 | 9993  | 68.9  | YGR234W |
| IIVVDDGVLSFQVLEVVDDK          | 86.1   | 1133.6  | 756.067 | 17212 | 131.9 | YAL038W |
| ILDSALVTAQLAK                 | 65.5   | 707.419 | 471.949 | 9777  | 67.6  | YLL026W |
| ILEGIIGANFVGFQTK              | 30.35  | 853.977 | 569.654 | 12115 | 82.4  | YMR261C |
| ILEQFEYVLYPSK                 | 13.19  | 814.932 | 543.624 | 11191 | 76.5  | YPL231W |
| ILNHMIETGAEYIMELTDK           | 44.13  | 1111.05 | 741.034 | 14132 | 95.6  | YKL035W |
| ILPEPTEGFAADDEPTPAELVGK       | 21.66  | 1249.12 | 833.083 | 8135  | 68.2  | YKL182W |
| ILSQAPSELELQVAK               | 33.16  | 813.459 | 542.642 | 7974  | 56.3  | YNL096C |
| ILTGTVVSTK                    | 34.3   | 509.811 | 340.21  | 3478  | 28.7  | YDR025W |
| ILVTPEYEK                     | 23.53  | 546.303 | 364.538 | 4608  | 35.6  | YPR041W |
| INAGLYILNPEVIDLIEMKPTSIEK     | 30.96  | 1407.27 | 938.517 | 14764 | 99.8  | YDL055C |
| INELTLLVQK                    | 63.79  | 585.858 | 390.908 | 8861  | 61.8  | YNL178W |
| INHEDGFIIETELLNIYDSEDPPQVFDER | 24.52  | 1733.8  | 1156.2  | 11315 | 90.4  | YER021W |
| INLPCVNPPTGGEVQTDFTHLR        | 23.84  | 1206.6  | 804.737 | 9240  | 64.2  | YGL087C |
| INNALAQVLLAK                  | 53.82  | 634.39  | 423.263 | 10054 | 69.3  | YGL026C |
| INNPAIDTVTLNTVDTDIHSAK        | 20.9   | 1176.61 | 784.74  | 8843  | 61.7  | YKL157W |
| IPALGLGTANPHEK                | 55.73  | 709.393 | 473.265 | 4894  | 37.4  | YBR149W |
| IPAWFLNR                      | 49.59  | 508.787 | 339.527 | 9600  | 66.4  | YML026C |
| IPDILLDDENVTSDDLFLGFLAR       | 92.4   | 1240.59 | 827.399 | 13471 | 105.3 | YCL040W |
| IPEIPLVVSTDLRESIQK            | 40.44  | 941.033 | 627.691 | 12799 | 86.8  | YDR012W |
| IPGGDVLDSR                    | 15.32  | 514.772 | 343.517 | 4811  | 36.9  | YJL014W |
| IPQQQPAPAEITPSYALGK           | 50.25  | 1005.04 | 670.362 | 5675  | 50    | YLL026W |
| IPVGYSSNDDEDTR                | 27.78  | 784.347 | 523.234 | 3121  | 26.5  | YMR307W |
| IPVLEQELVR                    | 26.08  | 598.356 | 399.24  | 8468  | 59.4  | YPL004C |
| IPVLGHADGICSIYLDEADALIK       | 20.32  | 1264.14 | 843.096 | 11334 | 77.4  | YOR323C |

|                                |        |         |         |       |       |           |
|--------------------------------|--------|---------|---------|-------|-------|-----------|
| IPYPLENTLSYR                   | 26.93  | 854.931 | 570.29  | 8319  | 58.5  | YER080W   |
| IQDINANNVGALEELTDILR           | 24.69  | 1162.63 | 775.42  | 14525 | 112.6 | YDR238C   |
| IQEPVFLVEIQCPQAVGGIYSVLNK      | 73.1   | 1465.77 | 977.516 | 15511 | 104.8 | YOR133W   |
| IQGPNYVPGK                     | 21.1   | 536.793 | 358.198 | 3273  | 27.4  | YOR133W   |
| IQNFGYNFDNTADELIK              | 15.5   | 1052.01 | 701.672 | 8641  | 71.8  | YDR293C   |
| IQQDTLIQTK                     | 44.72  | 594.335 | 396.559 | 3485  | 28.7  | YIL041W   |
| IQQGTDLAEVAPILCAGVTVYK         | 34.24  | 1173.62 | 782.751 | 11943 | 81.3  | YMR083W   |
| ISDDILSVLDSHLIPSATTGESK        | 29.24  | 1199.62 | 800.083 | 12852 | 87.2  | YDR099W   |
| ISGLESNTTLSEALK                | 41.01  | 781.917 | 521.614 | 7822  | 55.4  | YDL195W   |
| ISGVEVESPTSPVQSLIPKPLESVK      | 36.04  | 1384.26 | 923.176 | 11985 | 81.6  | YJR139C   |
| ISHVSTGGGASLELLEGGK            | 75.84  | 877.968 | 585.648 | 6866  | 49.5  | YCR012W   |
| ISIFEAVHGSAPDIAGQDK            | 24.78  | 977.997 | 652.334 | 8798  | 61.4  | YOR136W   |
| ISNEQYER                       | 19.8   | 519.746 | 346.833 | 1242  | 15    | YMR205C   |
| ISSIQDILPALEISNQSR             | 15.78  | 992.539 | 662.028 | 12235 | 83.2  | YLR259C   |
| ISSTIVAQSAK                    | 22.84  | 552.817 | 368.88  | 2582  | 23.2  | YNR016C   |
| ISVGIEDTDDLLEDIK               | 32.35  | 887.951 | 592.303 | 11733 | 80    | YAL012W   |
| ISVISDESK                      | 22.33  | 521.259 | 347.841 | 2966  | 25.6  | YLR354C   |
| ITDEEASYK                      | 31.36  | 528.248 | 352.501 | 1607  | 17.3  | YJR145C   |
| ITEKPELINDILLECGFPNTSGQKPNEYNY | 37.16  | 1748.85 | 1166.24 | 10175 | 82.5  | YCL050C   |
| ITGMILDLPQEVFPILLESDELFEQHYK   | 25.86  | 1651.34 | 1101.23 | 13926 | 108.5 | YER165W   |
| ITSTDPNADYGK                   | 58.89  | 641.301 | 427.87  | 1735  | 18    | YNR001C   |
| ITTIEEFLHSLPVK                 | 62     | 870.501 | 580.67  | 13623 | 92.3  | YGL123W   |
| IVAGQVDTDEAGYIK                | 50.86  | 789.904 | 526.938 | 5642  | 41.9  | YDR353W   |
| IVAVTGTEAFAEQR                 | 50.22  | 746.394 | 497.932 | 6208  | 45.4  | YOR335C   |
| IVDLEQSSEFASLFLPK              | 80.56  | 962.009 | 641.675 | 13488 | 91.4  | YKL081W   |
| IVDVVGTLSR                     | 42.01  | 529.814 | 353.545 | 6868  | 49.5  | YKL182W   |
| IVELDHLITIGNVFLGK              | 29.59  | 935.028 | 623.687 | 11164 | 76.3  | YKL035W   |
| IVEQLADYLLIGVQY                | 23.07  | 812.435 | 541.959 | 14137 | 95.6  | YOR122C   |
| IVNEEFQLEEDTPVYK               | 51.69  | 1034.49 | 689.997 | 7506  | 63.7  | YLR200W   |
| IVPAEDGSGAGAAVIAAALQK          | 104.34 | 955.023 | 637.018 | 10582 | 72.6  | YGL253W   |
| IVQDISQLTLLTSSLINELK           | 14.02  | 1179.16 | 786.444 | 13939 | 108.6 | YGL068W   |
| IVSNASCTTNCLAPLAK              | 85.61  | 910.456 | 607.306 | 5587  | 41.6  | YGR192C   |
| IVTEAVEIEQR                    | 47.51  | 643.851 | 429.57  | 4834  | 37    | YJL026W   |
| IVVEYIAAIGADLIDER              | 27.86  | 930.509 | 620.675 | 15612 | 105.5 | YLR249W   |
| IYPTYDFCVPIVDAIEGVTHALR        | 14.8   | 1325.17 | 883.784 | 17066 | 115.5 | YGL245W   |
| IYTISEPEALPILLEDASR            | 59.73  | 1116.09 | 744.398 | 11909 | 94.5  | YLL018C   |
| KPENAETPSQTSQEATQ              | 65.39  | 923.427 | 615.954 | 1095  | 14.1  | YML008C   |
| KPLLESGTLGTK                   | 23.62  | 622.366 | 415.247 | 3663  | 29.8  | YKL210W   |
| KPLNPFLGELFVVGK                | 19.14  | 779.953 | 520.305 | 11347 | 77.5  | YPL145C   |
| LAADVPLEPESK                   | 21.71  | 634.84  | 423.563 | 5153  | 38.9  | YDR233C   |
| LADDIPNSPMAINCEYGSFDNEHLVLR    | 38.55  | 1637.76 | 1092.18 | 8779  | 72.8  | YFR053C   |
| LADELESQIDLVSSEIALDNGK         | 19.67  | 1180.1  | 787.067 | 12008 | 95.2  | YPL061W   |
| LADGLFVNVAK                    | 67.1   | 573.829 | 382.889 | 8329  | 58.5  | YOR136W   |
| LAEELGLVSR                     | 49.71  | 543.811 | 362.877 | 6476  | 47    | YER063W   |
| LAESSIGEAR                     | 36.81  | 516.77  | 344.849 | 2274  | 21.4  | YJR014W   |
| LCDEIATIQSK                    | 42.68  | 639.324 | 426.552 | 4911  | 37.5  | YML024W   |
| LDELTAYFIECMEK                 | 63.55  | 881.407 | 587.941 | 13880 | 93.9  | YDR516C   |
| LDGLIILGGFEGFR                 | 35.67  | 753.919 | 502.949 | 14206 | 96.1  | YGR240C   |
| LDGLSVQELMDSK                  | 56.65  | 717.861 | 478.91  | 9934  | 68.5  | YLR432W   |
| LDIALSTSLPVALVFLPAADIPTFVGEK   | 13.62  | 1477.83 | 985.554 | 17882 | 121.4 | YER055C   |
| LDLFPEDLNILGK                  | 19.96  | 743.911 | 496.277 | 13189 | 89.4  | YNL220W   |
| LDNTVAEIEGLEATIENLK            | 42.35  | 1036.54 | 691.363 | 13442 | 105.1 | YGR094W   |
| LDQLIYVPLPDENAR                | 70.34  | 878.467 | 585.981 | 10575 | 72.6  | YDL126C   |
| LDQVWGSETVASSK                 | 14.43  | 753.875 | 502.919 | 5861  | 43.3  | YDR012W   |
| LDVDELGDVAQK                   | 70.07  | 651.333 | 434.558 | 7018  | 50.4  | YLR043C   |
| LEETCDDISASNDLFR               | 57.25  | 1007.44 | 671.962 | 6276  | 54.6  | YJR064W   |
| LESFQAVYNK                     | 22.94  | 599.809 | 400.208 | 5638  | 41.9  | YNL096C   |
| LESYVASIEQTVDPVLSK             | 83.26  | 1083.56 | 722.711 | 10011 | 81.4  | YDL229W   |
| LEVGTETLIDK                    | 25.1   | 609.335 | 406.559 | 6463  | 47    | YML126C   |
| LEVPGYVDIVK                    | 20.82  | 616.35  | 411.236 | 9077  | 63.2  | YOL121C   |
| LFEQEGVSK                      | 24.23  | 518.769 | 346.182 | 3079  | 26.3  | YLR354C   |
| LGANYAPCVLPQLQAASR             | 46.78  | 965.004 | 643.672 | 9238  | 64.2  | YJR148W   |
| LGECDVIEIIMLGEQFLK             | 20.87  | 1110.55 | 740.702 | 13740 | 107.2 | YIL142W   |
| LGEGVNVEQVEGLMSLEQYEK          | 34.29  | 1176.08 | 784.386 | 10388 | 84    | YAL044C   |
| LGEHNIDVLEGNEQFINAAK           | 36.91  | 1106.06 | 737.706 | 8611  | 60.3  | gi 136429 |
| LGEMPADQGFPAYLGA               | 53.57  | 882.935 | 588.959 | 9406  | 65.2  | YDL185W   |

|                                |        |         |         |       |       |           |
|--------------------------------|--------|---------|---------|-------|-------|-----------|
| LGFTFSYPVDQTSLSNGTLIR          | 82.97  | 1158.6  | 772.734 | 10374 | 83.9  | YCL040W   |
| LGGEVDFDFTK                    | 60.71  | 613.327 | 409.22  | 9981  | 68.8  | YMR083W   |
| LGGSSLLECVVFGFR                | 23.1   | 747.393 | 498.598 | 12330 | 83.8  | YEL047C   |
| LGGTCLNVGCIPSK                 | 28.73  | 738.371 | 492.583 | 6311  | 46    | YFL018C   |
| LGLEPDTEAR                     | 38.09  | 550.783 | 367.524 | 3846  | 30.9  | YOR335C   |
| LGNPMPMEATQAAPTIK              | 31.14  | 885.45  | 590.636 | 6985  | 50.2  | YLR179C   |
| LGPEITVAALK                    | 49.59  | 556.34  | 371.229 | 7996  | 56.4  | YER110C   |
| LGQEFADDDGELVSAADIVPIVQEK      | 50.15  | 1329.66 | 886.776 | 10149 | 82.3  | YPR033C   |
| LGSLVGGQDSGYVGGLPK             | 37.26  | 823.941 | 549.63  | 7832  | 55.4  | YKR048C   |
| LGYSVYEDAQYIGHAFK              | 22.33  | 980.976 | 654.319 | 10572 | 72.6  | YNR034W-A |
| LGYTEPDPDR                     | 28.01  | 524.259 | 349.842 | 3095  | 26.4  | YJR139C   |
| LHEEYFGEDK                     | 19.19  | 633.785 | 422.859 | 3325  | 27.8  | YNL247W   |
| LIDEYGDFFAK                    | 26.82  | 643.301 | 429.203 | 6379  | 46.4  | YLR259C   |
| LIDLTQFPFVTPMGK                | 49.26  | 889.481 | 593.323 | 13341 | 90.4  | YLR044C   |
| LIDVDGKPIQVFEK                 | 18.05  | 864.98  | 576.989 | 7686  | 54.5  | YAL005C   |
| LIEAFNEIAEDSEQFDK              | 103.89 | 999.471 | 666.649 | 11439 | 78.1  | YMR186W   |
| LIEAFNEIAEDSEQFEK              | 53.53  | 1006.48 | 671.321 | 9656  | 78.9  | YPL240C   |
| LIEFGFTDEMIAMPISALSGGWK        | 39.36  | 1257.13 | 838.42  | 15037 | 116.3 | YLR249W   |
| LIEPYVAYGYPSYSTIR              | 51.68  | 996.509 | 664.675 | 9996  | 68.9  | YGL076C   |
| LISSNLEMEIIPNQK                | 50.32  | 929.485 | 619.992 | 9142  | 63.6  | YKL035W   |
| LINQLAQELGIYSHELELYGHYK        | 36.95  | 1366.21 | 911.141 | 13284 | 90    | YGR204W   |
| LISDYDADELAELQPVIVNTPHLK       | 26.66  | 1382.72 | 922.152 | 13158 | 89.2  | YHR064C   |
| LISETLNDPTEEYLLDMAK            | 51.7   | 1098.04 | 732.364 | 10047 | 81.6  | YPR160W   |
| LIYNLEDQGGELCSLR               | 70     | 940.465 | 627.312 | 9427  | 65.4  | YPR033C   |
| LLDTLSDESK                     | 17.66  | 560.79  | 374.196 | 4338  | 34    | YGL195W   |
| LLEMSTEDFVK                    | 51     | 656.329 | 437.888 | 8653  | 60.5  | YOL040C   |
| LLGAQHLEAGVDALIVCGDGLTGADLFR   | 41.52  | 1569.82 | 1046.88 | 14082 | 109.6 | YMR205C   |
| LLNEATHETSGATEFFASEFNTK        | 31.34  | 1272.6  | 848.734 | 9955  | 68.7  | YLR178C   |
| LLPWFDMLEADEAYFK               | 38.23  | 1022.99 | 682.329 | 14495 | 112.4 | YKL060C   |
| LLTLTNAANVPVENIWADIFAK         | 45.31  | 1207.16 | 805.109 | 14588 | 113.1 | YDL081C   |
| LLYETALLTSGFSLDEPTSFASR        | 68.04  | 1259.64 | 840.095 | 11849 | 94.1  | YPL240C   |
| LNDIEDVEK                      | 46.08  | 537.769 | 358.849 | 3525  | 29    | YBR011C   |
| LNELLDAIR                      | 22.16  | 528.806 | 352.873 | 8563  | 60    | YCR084C   |
| LNELTTDLQESQTK                 | 58.92  | 810.41  | 540.609 | 5625  | 41.8  | YBL047C   |
| LNINVIDTPGFGDFIDNSK            | 14.4   | 1040.02 | 693.685 | 10543 | 85.1  | YCR002C   |
| LNNFNDVSSYENENK                | 46.36  | 829.376 | 553.253 | 4584  | 35.5  | YGR155W   |
| LNNVFIGEQGKPYISLPK             | 26.37  | 1058.59 | 706.065 | 8373  | 69.9  | YJR145C   |
| LNNVSLSSDAFFPPDNVYR            | 30.34  | 1151.56 | 768.043 | 10962 | 88    | YLR028C   |
| LNSHDQIADYQNTNVPNIYSLGDVVVK    | 18     | 1608.79 | 1072.87 | 9001  | 74.4  | YPL091W   |
| LNYNVTSGVNGPLVILEK             | 46.45  | 965.536 | 644.026 | 10757 | 73.7  | YBR127C   |
| LPAASLGDMVMATVK                | 28.1   | 752.399 | 501.935 | 11338 | 77.4  | YBL087C   |
| LPANLLQAQR                     | 36.72  | 562.333 | 375.224 | 5895  | 43.5  | YHR183W   |
| LPELLQDAVLK                    | 47.92  | 619.871 | 413.583 | 10372 | 71.3  | YHR068W   |
| LPENESLSTVMGILGSGVHR           | 16.09  | 1048.54 | 699.365 | 12153 | 82.7  | YBR214W   |
| LPETENLSTVIGILGSGVHR           | 26.3   | 1046.57 | 698.051 | 12457 | 84.6  | YGL056C   |
| LPGIIHIDAAEIYR                 | 46.32  | 790.943 | 527.631 | 9574  | 66.3  | YDL124W   |
| LPIGLLATQFFADR                 | 43.21  | 782.412 | 521.944 | 13190 | 89.4  | YJL111W   |
| LPLIPDQIGVENVDNADFLR           | 73.88  | 1119.59 | 746.73  | 10772 | 86.7  | YDL190C   |
| LPLTDEQTAEGR                   | 55.29  | 665.336 | 443.893 | 3568  | 29.2  | YHR146W   |
| LPLVGGHEGAGVVVMGMGENVK         | 92.34  | 1010.04 | 673.695 | 18790 | 149.8 | YOL086C   |
| LPTESVPEPK                     | 47.29  | 548.798 | 366.201 | 3597  | 29.4  | YMR242C   |
| LPWSIVPSIK                     | 32.73  | 570.345 | 380.566 | 10764 | 73.8  | YML100W   |
| LQDAPEESYTR                    | 34.37  | 654.807 | 436.874 | 2815  | 24.7  | YCL030C   |
| LQETNPPEVVK                    | 32.21  | 642.327 | 428.554 | 2612  | 23.4  | YKL056C   |
| LQLGQLYESGNPVNDANLLGAEVLIK     | 23.7   | 1384.75 | 923.499 | 11870 | 94.2  | YBL045C   |
| LQNTDLNELTDETSILAQIK           | 62.44  | 1194.12 | 796.415 | 12650 | 99.6  | YFL022C   |
| LSAAQAEALAYAEAGHDK             | 18.27  | 923.452 | 615.971 | 6410  | 46.6  | YDR454C   |
| LSAEEDVFEIIGGTR                | 42.49  | 918.473 | 612.651 | 12705 | 86.2  | YPL106C   |
| LSATSQTAASATPGVAQSR            | 20.3   | 902.463 | 601.978 | 2882  | 25.1  | YDL226C   |
| LSETVLEDVYNQLPELIGGSADLTSPNLTR | 21.45  | 1622.83 | 1082.22 | 14351 | 111.4 | YPR074C   |
| LSEVVELFEVFTPDQGR              | 25.7   | 983.002 | 655.67  | 14830 | 100.2 | YHR087W   |
| LSFDTQATIEK                    | 55     | 626.825 | 418.219 | 5974  | 44    | YLR354C   |
| LSSSEVIEQIVK                   | 68.33  | 666.374 | 444.585 | 9649  | 66.8  | YDR064W   |
| LTADYDALDIANR                  | 96.52  | 725.862 | 484.244 | 7899  | 55.8  | YOL127W   |
| LTAPQDIQISEDGK                 | 24.12  | 757.888 | 505.595 | 5608  | 41.7  | YHL021C   |
| LTIIPDGGVK                     | 13.53  | 506.805 | 338.206 | 7270  | 52    | YIR029W   |

|                                |       |         |         |       |       |         |
|--------------------------------|-------|---------|---------|-------|-------|---------|
| LTTNLEYTLPEVSEILGPQNK          | 62.29 | 1180.12 | 787.085 | 9739  | 79.5  | YHR064C |
| LYEPIDLSSILSDGEEK              | 42.32 | 1005    | 670.337 | 10881 | 87.4  | YJL080C |
| LVADGVFYAELNEFFTR              | 18.77 | 995.999 | 664.335 | 15503 | 104.8 | YNL178W |
| LVEGLANDPENK                   | 52.45 | 649.833 | 433.558 | 3514  | 28.9  | YOR369C |
| LVLIANDVDPIELVVFLPALCK         | 56.98 | 1226.2  | 817.803 | 15910 | 122.4 | YHL033C |
| LVSWYDNEYGYSTR                 | 52.63 | 876.897 | 584.934 | 8277  | 58.2  | YGR192C |
| LVTDLVQQPEVLGEGVDVNEGLIK       | 26.17 | 1355.21 | 903.811 | 11231 | 76.8  | YKL210W |
| LWGDSEFFNPK                    | 28.65 | 605.798 | 404.201 | 10425 | 71.6  | YOR133W |
| LWTEFNEDAEPVTTDAIILATGASAK     | 15.09 | 1382.19 | 921.796 | 13430 | 91    | YDR353W |
| LYGTDDNTQEVEAVTNK              | 67.48 | 948.945 | 632.966 | 5323  | 40    | YJR014W |
| LYQTEPSGIYSSWSAQITGR           | 17.64 | 1122.55 | 748.703 | 7706  | 65.2  | YOL038W |
| MEILCQQR                       | 45.34 | 539.263 | 359.844 | 4133  | 32.7  | YLR058C |
| MFILDEADEMLSSGFK               | 79.78 | 916.926 | 611.62  | 14818 | 100.2 | YKR059W |
| MFTDLFDYFPITALVDNK             | 33.63 | 1075.53 | 717.355 | 15635 | 120.5 | YDL134C |
| MFTDLFDYFPVTALVDNK             | 25.32 | 1068.52 | 712.683 | 14925 | 115.4 | YDL188C |
| MGTTGVQSSVASDLDELISR           | 56.94 | 1033.51 | 689.34  | 10435 | 84.3  | YGL026C |
| MGVPIYGIVAMAATATDK             | 18.78 | 904.968 | 603.648 | 13877 | 93.9  | YPL231W |
| MIEIMLPVFDAPQNLVEQAK           | 76.64 | 1143.6  | 762.734 | 12834 | 100.9 | YLR044C |
| MIPGAKPLQVGDVVSTTAVIESVVNQPTGK | 23.14 | 1518.33 | 1012.55 | 10554 | 85.1  | YKL182W |
| MPELIPVLESETMWDTK              | 53.32 | 945.473 | 630.651 | 14156 | 95.8  | YDR249W |
| MPLVGLGCWK                     | 21.63 | 580.801 | 387.537 | 9970  | 68.8  | YHR104W |
| MPQTVESWK                      | 37.67 | 553.271 | 369.183 | 4791  | 36.7  | YLR109W |
| MSAEGYIDYPTYEELAK              | 57.27 | 990.451 | 660.636 | 9408  | 65.2  | YHR179W |
| MSANISSETTAMITDIATAPAEIDR      | 83.82 | 1261.61 | 841.409 | 11616 | 92.5  | YLR044C |
| MTAEKPDPTLAVICGAATK            | 15.33 | 987.505 | 658.673 | 6782  | 48.9  | YNR016C |
| MYEELWPGWKPFIDITAK             | 31.2  | 1091.54 | 728.027 | 12286 | 83.5  | YGR234W |
| NAAWLVFANK                     | 63.74 | 567.309 | 378.542 | 9670  | 66.9  | YDL192W |
| NADELSSYQK                     | 26.39 | 577.77  | 385.516 | 2528  | 22.9  | YMR314W |
| NAGLALTDFTGDDFLK               | 29.39 | 899.946 | 600.3   | 11655 | 79.5  | YOR209C |
| NAGQICSSGSR                    | 53.43 | 568.759 | 379.509 | 941   | 13.2  | YPL061W |
| NAGTAEFLVDNQNR                 | 67.22 | 774.874 | 516.918 | 5696  | 42.3  | YBR218C |
| NAIEEELAK                      | 21.8  | 508.767 | 339.513 | 4928  | 37.6  | YCR053W |
| NALKPVFDQLYESTK                | 45.55 | 876.962 | 584.977 | 8899  | 62.1  | YLR355C |
| NAPAIIFIDEIDSIAPK              | 20.02 | 913.999 | 609.668 | 15081 | 101.9 | YDL126C |
| NASNNPNELAASGAALQAR            | 79.3  | 934.964 | 623.645 | 5265  | 39.6  | YHR064C |
| NATFPGVQMK                     | 25.63 | 546.779 | 364.855 | 5477  | 40.9  | YLR044C |
| NAVQNESVSSPIELNFDVAVK          | 52.87 | 1081.04 | 721.031 | 8141  | 68.3  | YPR191W |
| NAVSTKPTPPAPEASAESGLSSK        | 24.41 | 1162.09 | 775.064 | 3735  | 30.3  | YMR205C |
| NAVWFGGSLLAQTAEFK              | 38.49 | 919.975 | 613.653 | 12843 | 87.1  | YJR065C |
| NAVWLVFANK                     | 29.62 | 581.324 | 387.885 | 10680 | 73.2  | YDL137W |
| NCTPKPTSTTETVAASAVAAVFEQK      | 37.07 | 1304.65 | 870.102 | 10794 | 74    | YAL038W |
| NDELGTPFGVTIDFESAK             | 50.12 | 970.468 | 647.314 | 11847 | 80.7  | YBR121C |
| NDPTWQGPILAPGLINR              | 57.78 | 931.5   | 621.335 | 10644 | 73    | YNL117W |
| NDSLGSVAVIAAIMQEAGLR           | 67.01 | 958.499 | 639.335 | 16132 | 109   | YDR394W |
| NDVRPEWEDEANAK                 | 16.13 | 836.882 | 558.257 | 3660  | 29.8  | YOL139C |
| NEAVDATHLAEFHQVEGLADYNITLGLIK  | 15.17 | 1698.36 | 1132.58 | 14920 | 100.8 | YFL022C |
| NEFSGALSLTR                    | 28.02 | 626.32  | 417.882 | 8245  | 58    | YIL078W |
| NENEQVLIEPSVNSVR               | 22.08 | 913.966 | 609.646 | 6652  | 48.1  | YKL013C |
| NEQASSVYSTQLLADIISEASK         | 54.04 | 1177.59 | 785.396 | 14618 | 98.8  | YGR240C |
| NESMLTFETSQLQGAK               | 91.31 | 892.43  | 595.289 | 8694  | 60.8  | YER009W |
| NETNNIDGNFK                    | 53.26 | 633.291 | 422.53  | 3062  | 26.2  | YOR332W |
| NEVQIPVTFYGYVDRPEGGK           | 17.73 | 1134.57 | 756.715 | 9607  | 66.5  | YPR160W |
| NFAEFNSVYAK                    | 42.8  | 645.312 | 430.544 | 7298  | 52.1  | YIL051C |
| NFLETVELQVGLK                  | 25.58 | 745.417 | 497.28  | 13434 | 91    | YGL135W |
| NFNDPEVQGDMMK                  | 62.51 | 697.306 | 465.207 | 4193  | 33.1  | YLL024C |
| NGFILDGFPR                     | 52.54 | 568.298 | 379.201 | 10171 | 70    | YDR226W |
| NGGLGWLDAIIPFAAIEPQEGIELEHIDSK | 31.41 | 1609.82 | 1073.55 | 14202 | 110.4 | YPL231W |
| NGMVVGLGAGQQSR                 | 69.91 | 687.351 | 458.57  | 4605  | 35.6  | YMR120C |
| NGPVYGVPPQGGFPR                | 18.99 | 771.397 | 514.6   | 6695  | 48.4  | YER165W |
| NIAEAQGIVELLLSDYYSVEQK         | 25.98 | 1241.64 | 828.095 | 17237 | 116.7 | YIL076W |
| NIDDLVLMDHVK                   | 51.81 | 749.882 | 500.257 | 10066 | 69.3  | YGR234W |
| NIEPIDTPISFR                   | 13.52 | 701.372 | 467.917 | 9089  | 63.3  | YDR238C |
| NIFQSISAK                      | 31.39 | 504.28  | 336.522 | 7120  | 51    | YHR183W |
| NIGVSNFAVEDLQR                 | 47.75 | 781.402 | 521.27  | 8773  | 61.3  | YDL124W |
| NIIVATGSEVTPFPGIEIDEEK         | 27.66 | 1179.61 | 786.741 | 9522  | 78    | YFL018C |
| NILAESNSSLDNIVK                | 88.52 | 808.928 | 539.621 | 8669  | 60.6  | YIL051C |



|                               |       |         |         |       |       |         |
|-------------------------------|-------|---------|---------|-------|-------|---------|
| NINSETTDEQFQELFAK             | 56.7  | 1007.47 | 671.985 | 8318  | 69.6  | YER165W |
| NPIEVVALINDTTGLVASYYTDPETK    | 40.49 | 1519.28 | 1013.19 | 15909 | 122.4 | YGL253W |
| NIPSFLSTDNIGTR                | 27.79 | 767.897 | 512.267 | 9092  | 63.3  | YDL185W |
| NISFTVWDVGGQDR                | 22.19 | 797.386 | 531.927 | 10482 | 72    | YDL137W |
| NISSVPDELPDWLIPGSK            | 19.64 | 984.01  | 656.342 | 12622 | 85.7  | YNL084C |
| NITLDVSER                     | 19.57 | 523.777 | 349.521 | 5061  | 38.4  | YJL130C |
| NITWIAECIAQNQR                | 41.94 | 858.928 | 572.954 | 10362 | 71.2  | YLR447C |
| NIVEFHSDHMK                   | 37.98 | 678.822 | 452.884 | 2916  | 25.3  | YLR044C |
| NIYYITGESLK                   | 49.99 | 650.843 | 434.231 | 7512  | 53.4  | YMR186W |
| NKPDPAIVEK                    | 18.93 | 555.811 | 370.877 | 1290  | 15.3  | YJL026W |
| NLADNDEYPQLIELTQR             | 53.7  | 1016.5  | 678.004 | 8504  | 70.9  | YMR250W |
| NLAGVDYLTISPALLDK             | 71.84 | 901.999 | 601.668 | 12059 | 82    | YLR354C |
| NLATLLTLDYIQK                 | 53.28 | 753.432 | 502.624 | 13577 | 91.9  | YDR071C |
| NLFTGWVDVK                    | 27.89 | 589.814 | 393.545 | 11681 | 79.6  | YKL152C |
| NLPDMIEELDLHED                | 38.06 | 841.882 | 561.591 | 12035 | 81.9  | YDL022W |
| NLQYYDISAK                    | 34.11 | 607.806 | 405.54  | 5805  | 42.9  | YOR185C |
| NLTEEVWAVK                    | 15.19 | 594.817 | 396.88  | 8141  | 57.3  | YLR249W |
| NLTEQAIIDLTVATIAIK            | 14.95 | 964.059 | 643.042 | 16060 | 108.6 | YMR120C |
| NLWWEYESVVQYR                 | 29.6  | 842.92  | 562.282 | 10915 | 74.7  | YMR079W |
| NLYVGQEDNEMTIPTCSR            | 15.56 | 1063.98 | 709.654 | 5903  | 51.7  | YGR094W |
| NMITGTSQADCAILLIAGGVGEFEAGISK | 93.16 | 1462.23 | 975.156 | 17072 | 115.5 | YPR080W |
| NNDDGELGFLILDVAVLCK           | 90.55 | 1003.5  | 669.335 | 14960 | 115.7 | YJL173C |
| NNDISFEIGK                    | 15.77 | 568.783 | 379.524 | 6495  | 47.2  | YMR012W |
| NNLNTEPLWDAIVGLGFLK           | 37.46 | 1114.59 | 743.395 | 17805 | 120.8 | YDL185W |
| NNLWDDDLAR                    | 19.87 | 665.823 | 444.218 | 9043  | 63    | YGR155W |
| NNQFLNPDNITYIFTSR             | 33.32 | 1077.53 | 718.692 | 11149 | 89.2  | YKR043C |
| NNSELLANLGNFVNR               | 71.98 | 837.932 | 558.957 | 11158 | 76.3  | YGR264C |
| NNYDGDVTVFSPTGR               | 48.25 | 822.368 | 548.581 | 5591  | 41.6  | YMR314W |
| NNYIGPGPPK                    | 13.09 | 528.777 | 352.854 | 2811  | 24.6  | YLR179C |
| NPHDIEGINAGEIEIPEN            | 54.6  | 1037.51 | 692.008 | 8498  | 70.8  | YEL054C |
| NPLFSYVEPVLVASAK              | 52.32 | 867.477 | 578.654 | 12688 | 86.1  | YDL075W |
| NPSDITQEEYNAFYK               | 92.2  | 909.913 | 606.944 | 7950  | 56.2  | YMR186W |
| NPVILADACCSR                  | 71.86 | 688.326 | 459.22  | 4851  | 37.1  | YLR044C |
| NPVTGAQGITLSEGNEILK           | 86.05 | 971.018 | 647.681 | 8659  | 60.6  | YLR432W |
| NQAAMNPSNTVFDK                | 92.94 | 804.378 | 536.588 | 5439  | 40.7  | YAL005C |
| NQEIFDANVQR                   | 14.04 | 667.328 | 445.221 | 4889  | 37.3  | YDL082W |
| NQILVSGEIPSTLNEESK            | 88.26 | 979.507 | 653.341 | 8024  | 56.6  | YBR072W |
| NQITETYPGQITLSNAVTK           | 15.55 | 1083.06 | 722.374 | 6133  | 53.5  | YOL057W |
| NRPAPSVEQVK                   | 38.07 | 612.838 | 408.895 | 1277  | 15.2  | YDR158W |
| NSFAVIEFTPEVLR                | 14.87 | 868.946 | 579.633 | 12084 | 82.2  | YDL051W |
| NSNPENTVGLISGAGANPR           | 47.45 | 934.466 | 623.313 | 6266  | 45.8  | YHR200W |
| NSSAVITDGLKPIHIVTK            | 15.63 | 947.044 | 631.698 | 6832  | 49.3  | YGR155W |
| NSSCYFLGDATNDSLQR             | 90    | 974.429 | 649.955 | 7659  | 54.3  | YIL078W |
| NSYGSSNYGSSNDDSYGSSNR         | 51.71 | 1166.45 | 777.971 | 1804  | 21.8  | YMR173W |
| NTDDSVLVLVDSAK                | 60.11 | 794.925 | 530.286 | 11603 | 79.1  | YGR061C |
| NTENEQASIFNK                  | 49.83 | 746.357 | 497.907 | 5131  | 38.8  | YOR198C |
| NTFAGGETSGLEVTDPSPDNSLLK      | 37.43 | 1225.09 | 817.062 | 7423  | 63.2  | YBL058W |
| NTGIDSQTSDFDPEAYTK            | 32.16 | 1051.48 | 701.323 | 7934  | 66.8  | YIL137C |
| NTNIPLPALQK                   | 43.45 | 604.853 | 403.571 | 7137  | 51.1  | YPL160W |
| NTTRPDFIFYSDR                 | 17.86 | 816.394 | 544.599 | 7498  | 53.4  | YHR128W |
| NTWGSQLVQIMDQVVTK             | 25.93 | 1031.52 | 688.014 | 14797 | 100   | YGL037C |
| NTYEYECFLLGENIGMK             | 46.87 | 1084.49 | 723.327 | 9300  | 76.4  | YLR249W |
| NVIAETGAGQHGVATATAK           | 23.75 | 1014    | 676.337 | 3519  | 28.9  | YGL026C |
| NVLEASNSLDR                   | 77.6  | 652.826 | 435.553 | 3914  | 31.4  | YER057C |
| NVLIVDEVDTR                   | 60.72 | 694.357 | 463.24  | 7508  | 53.4  | YDR399W |
| NVNDVIAPAFVK                  | 30.54 | 643.859 | 429.575 | 7898  | 55.8  | YGR254W |
| NVPLYQHLADLSK                 | 59.72 | 749.407 | 499.94  | 8184  | 57.6  | YHR174W |
| NVPVHVSPAFR                   | 29.23 | 611.838 | 408.228 | 4314  | 33.8  | YDR025W |
| NVQEFTTAAR                    | 53.5  | 568.788 | 379.528 | 3412  | 28.3  | YKL080W |
| NVQVHQEPYVFNARPDGVHVINVGK     | 29.82 | 1408.73 | 939.491 | 7106  | 51    | YLR048W |
| NVSGQDVAAALEANAK              | 25.12 | 779.397 | 519.934 | 7710  | 54.7  | YER091C |
| NVVVQTDGQLR                   | 41.73 | 614.836 | 410.226 | 3647  | 29.7  | YDL171C |
| NWGAETDELSMIIMEHFSQQ          | 61.71 | 1126.98 | 751.658 | 12852 | 101   | YOR369C |
| NYASEALISYFK                  | 46.46 | 703.354 | 469.238 | 11142 | 76.2  | YKL081W |
| NYIIIEELNVR                   | 31.89 | 631.841 | 421.563 | 9042  | 63    | YBL076C |
| PLFDLISPK                     | 20.21 | 515.303 | 343.871 | 10288 | 70.8  | YOR251C |

|                               |       |         |         |       |       |             |
|-------------------------------|-------|---------|---------|-------|-------|-------------|
| QAAASVVPSASSLVITALK           | 21.09 | 907.025 | 605.019 | 11230 | 76.7  | YEL054C     |
| QAIIELEGMLFAPEVK              | 47.13 | 981.987 | 654.994 | 11571 | 78.9  | YPL160W     |
| QAINLGQVVLPLTFALPR            | 55.99 | 1026.1  | 684.405 | 13488 | 105.4 | YHL001W     |
| QATGGQAFPQMVFHDHWSTLGSDDLPTSK | 53.8  | 1559.73 | 1040.16 | 11165 | 89.3  | YOR133W     |
| QAVVNPENTLFATK                | 29.6  | 766.409 | 511.275 | 7711  | 54.7  | YJR045C     |
| QDVEALIEFIYDETEK              | 34.01 | 906.949 | 604.968 | 14844 | 100.3 | YPL231W     |
| QDVSDLLDQDEYIDLVPVR           | 42.58 | 1116.56 | 744.706 | 11501 | 91.7  | YOR323C     |
| QEAGAFTFNEDF                  | 32.63 | 688.294 | 459.198 | 11107 | 76    | YJL026W     |
| QEDSNLISSEYEVK                | 34.44 | 820.886 | 547.593 | 6088  | 44.7  | YOR046C     |
| QFGYVILTTSAGIMDHEEAR          | 22.96 | 1119.55 | 746.7   | 11051 | 75.6  | YJL190C     |
| QFYVNVVEEEYK                  | 38.29 | 788.862 | 526.244 | 7304  | 52.2  | YKR059W     |
| QIAPAELEGLDLER                | 63.07 | 833.954 | 556.305 | 12612 | 85.6  | YPL231W     |
| QIFDEELIK                     | 18.98 | 567.806 | 378.873 | 11673 | 79.6  | YCL025C     |
| QIENAGEEGSVIIGK               | 37.46 | 828.944 | 552.965 | 6881  | 49.6  | YLR259C     |
| QITVVGATSGDTGSAAIYGLR         | 75.36 | 1019.03 | 679.692 | 6994  | 60    | YCR053W     |
| QIVFEIPSETH                   | 34.16 | 650.333 | 433.891 | 8821  | 61.6  | YOR096W     |
| QLAGIDDDQGHLLTSGWSR           | 31.81 | 989.48  | 659.989 | 5406  | 40.5  | YGR124W     |
| QLGEWAGLGK                    | 49.89 | 529.785 | 353.526 | 7273  | 52    | YOR369C     |
| QLLLLGNALPTVQSLSER            | 83.33 | 976.562 | 651.377 | 12739 | 86.5  | YPR036W     |
| QLSEDSHHLQSNNDNFSK            | 15.75 | 1050.47 | 700.651 | 2070  | 20.1  | YNL079C     |
| QLSIWGLENDDDVSDITDK           | 66.04 | 1082.01 | 721.674 | 9420  | 77.3  | YGR086C     |
| QLVDVYTTLPYDFILEK             | 18.61 | 1029.05 | 686.366 | 12223 | 96.7  | YNL259C     |
| QLYDYETEVSMSR                 | 32.58 | 767.348 | 511.901 | 7154  | 51.2  | YMR205C     |
| QLYSFDLEGFWMDVGGPK            | 84.06 | 1080.51 | 720.675 | 13068 | 102.5 | YDL055C     |
| QNEEDLLVGATDGVGTEK            | 78.87 | 859.434 | 573.292 | 6849  | 49.4  | YLR234W     |
| QNPQAIGQDLFTDPR               | 35.1  | 850.424 | 567.285 | 8217  | 57.8  | YOR027W     |
| QNVETLDIVR                    | 58.85 | 593.825 | 396.219 | 6140  | 45    | YLR304C     |
| QNWMTMENFIDTEINR              | 49.93 | 955.939 | 637.628 | 12024 | 81.8  | YMR217W     |
| QPASFLFLGSGSGK                | 26.87 | 754.909 | 503.608 | 11703 | 79.8  | YLL026W     |
| QPYIMDTSYPAR                  | 26.5  | 721.343 | 481.231 | 6125  | 44.9  | YFR053C     |
| QQLSNPEFVFSDFAK               | 41.78 | 878.931 | 586.29  | 11076 | 75.8  | YKL210W     |
| QQQDLDPEDIAFK                 | 22.07 | 773.873 | 516.251 | 7905  | 55.9  | YLR262C-A   |
| QQSLYLDPEPTFIEER              | 62.98 | 982.984 | 655.658 | 9941  | 68.6  | YIL078W     |
| QSQDSCYGVAFR                  | 20.22 | 709.312 | 473.21  | 5147  | 38.9  | YGR240C     |
| QSSATSSFGGLGGGSVR             | 26.55 | 777.879 | 518.922 | 5140  | 38.9  | gi 34783124 |
| QSSPANPIGTYEYSR               | 49.32 | 835.394 | 557.265 | 5618  | 41.8  | YAL012W     |
| QVNLTAPLPTSSPWK               | 65.89 | 868.472 | 579.317 | 8913  | 62.1  | YCL037C     |
| QVNVNTVFLPGDFNLSLDK           | 39.49 | 1145.61 | 764.074 | 14636 | 98.9  | YLR044C     |
| QYFVADIENSLPLACAYAR           | 31.42 | 1150.57 | 767.384 | 13695 | 92.7  | YMR120C     |
| QWFEAHYQTLGK                  | 30.47 | 782.881 | 522.256 | 6812  | 49.1  | YBL072C     |
| QYSEGQAQITLR                  | 47.28 | 697.357 | 465.241 | 4565  | 35.4  | YMR120C     |
| RPEYFITANDVK                  | 33.84 | 726.878 | 484.921 | 5404  | 40.5  | YIL053W     |
| RPYIAGLGAEK                   | 14.07 | 587.833 | 392.224 | 3739  | 30.3  | YFL018C     |
| SAADIVFLAPGLSAIDALK           | 15.03 | 993.069 | 662.382 | 18172 | 123.5 | YGL008C     |
| SAFDVPEWVDPNVQNLVSK           | 47.86 | 1072.54 | 715.36  | 10482 | 84.6  | YJL130C     |
| SAGGNVYVFGGEAK                | 44.2  | 649.822 | 433.551 | 5873  | 43.3  | YHR193C     |
| SANDLVETLSK                   | 20.73 | 588.809 | 392.875 | 6639  | 48.1  | YMR109W     |
| SANLMAGHWVAISGAAGGLGSLAVQYAK  | 44.69 | 1350.7  | 900.802 | 12129 | 82.5  | YOL086C     |
| SANPSNDIPLSR                  | 15.51 | 635.823 | 424.218 | 4043  | 32.2  | YGL202W     |
| SASEVASDLAQLTDFPVIR           | 82.37 | 1010.02 | 673.685 | 11741 | 93.3  | YGR279C     |
| SAVEVIEFVK                    | 23.87 | 560.816 | 374.213 | 8784  | 61.3  | YDL131W     |
| SAVTVVVAAGGYPESYAK            | 22.54 | 884.959 | 590.309 | 7833  | 55.4  | YGL234W     |
| SCGVDAMSVDDLK                 | 62.91 | 698.808 | 466.208 | 6335  | 46.2  | YGL135W     |
| SDAFAEFAEPLVNSAYEAIK          | 62.58 | 1086.53 | 724.688 | 12662 | 99.7  | YER110C     |
| SDFHVLFAVAQELR                | 18.7  | 816.431 | 544.623 | 12476 | 84.8  | YJL130C     |
| SDIVGSPVAELLK                 | 24.18 | 664.377 | 443.254 | 10201 | 70.2  | YGR204W     |
| SDLFDLFGPIGK                  | 43.61 | 654.845 | 436.899 | 13813 | 93.5  | YCL011C     |
| SDLTGANSIYSVEK                | 39.16 | 742.367 | 495.247 | 5884  | 43.4  | YFR010W     |
| SDLTLVQILK                    | 23.27 | 565.345 | 377.232 | 10475 | 71.9  | YGR218W     |
| SDLVDLLNIYK                   | 23.33 | 646.858 | 431.575 | 12670 | 86    | YDL131W     |
| SEAEAEAAGLPVVNLDTR            | 96.32 | 921.466 | 614.646 | 8491  | 59.5  | YLL018C     |
| SEELSEIDASTAK                 | 60.11 | 690.33  | 460.556 | 4232  | 33.3  | YPR036W     |
| SEELYPRPLAIALDTK              | 15.16 | 937.007 | 625.007 | 8879  | 61.9  | YAL038W     |
| SEGETEPPQPAESK                | 19.03 | 743.339 | 495.895 | 1255  | 15.1  | YGL202W     |
| SEGIEFFASPVTLGPDGIEK          | 72.69 | 1047.03 | 698.353 | 10362 | 83.8  | YKL085W     |
| SEIFSTYADNQPGVLIQVFEGER       | 79.65 | 1300.14 | 867.094 | 11969 | 94.9  | YAL005C     |

|                                       |        |         |         |       |       |            |
|---------------------------------------|--------|---------|---------|-------|-------|------------|
| SEIVGRPLAALLANDGATVYSVDVNNIQK         | 26.31  | 1514.31 | 1009.88 | 10093 | 81.9  | YKR080W    |
| SELEYAMLSK                            | 49.47  | 667.321 | 445.216 | 8975  | 62.5  | YGL030W    |
| SENPDITFGQVVK                         | 45.32  | 696.344 | 464.565 | 5957  | 43.9  | YPR052C    |
| SENPDVTFGQVGR                         | 49.03  | 703.339 | 469.228 | 5334  | 40.1  | YBR089C-A  |
| SEQHSVAVGK                            | 16.76  | 521.27  | 347.849 | 10695 | 73.3  | YIL009W    |
| SESVVYQGSR                            | 20.06  | 556.273 | 371.184 | 1830  | 18.6  | YCL043C    |
| SEVFSTYADNQPGVLIQVFEGER               | 58.28  | 1293.13 | 862.422 | 11597 | 92.3  | YLL024C    |
| SFANQPLEVVYSK                         | 37.68  | 741.385 | 494.593 | 8004  | 56.5  | YDR432W    |
| SFDELGLAPELLK                         | 28.3   | 716.39  | 477.929 | 11567 | 78.9  | YOR046C    |
| SFDPFADTGDDETATSNIYHIR                | 39.25  | 1236.55 | 824.703 | 8218  | 68.8  | YNL244C    |
| SFDVPPPIDASSPFSQK                     | 64.16  | 958.475 | 639.319 | 9784  | 67.6  | YKL152C    |
| SFEVTDVPVNSSLK                        | 49.52  | 711.859 | 474.909 | 7155  | 51.3  | YML070W    |
| SFLSPLETDEEIEVVIEQ GK                 | 20.62  | 1131.57 | 754.718 | 11873 | 94.2  | YGL062W    |
| SFLSYCGGLPAPEDSDNPLGYK                | 16.51  | 1194.05 | 796.367 | 8921  | 73.8  | YNR050C    |
| SFVVPQEVDHYQK                         | 34.36  | 869.925 | 580.286 | 7558  | 53.7  | YPR074C    |
| SFWDASDISDDVIELAGGMPNER               | 26.97  | 1262.57 | 842.048 | 13344 | 104.4 | YHR137W    |
| SGADDIVFATVQLK                        | 30.32  | 732.391 | 488.596 | 10062 | 69.3  | YMR315W    |
| SGAHLLFQPSGNVTELYGTAIGAR              | 33.08  | 1294.66 | 863.442 | 10631 | 72.9  | YMR314W    |
| SGETEDPFIADLVVGLR                     | 24.75  | 909.468 | 606.647 | 14435 | 97.6  | YPL281C    |
| SGETEDTFIADLVVGLR                     | 103.32 | 911.465 | 607.979 | 14625 | 98.9  | YGR254W    |
| SGQGAFGNMCR                           | 36.86  | 592.75  | 395.503 | 3297  | 27.6  | YDR012W    |
| SGQIQPHLDQLNLVLR                      | 28.71  | 916.013 | 611.011 | 9270  | 64.4  | YGL105W    |
| SGSAADTQAIADIVQYHLELYTSQYGTPTETAASVFK | 44.02  | 2010.97 | 1340.98 | 12858 | 101   | YJL001W    |
| SGSATQFDATDFATNEDLVELVK               | 81.56  | 1229.58 | 820.059 | 10063 | 81.7  | YKL142W    |
| SGTLTYEAVQQTTK                        | 55     | 763.888 | 509.595 | 4552  | 35.3  | YOR142W    |
| SGVAVADESLTAFNDLK                     | 82.18  | 868.939 | 579.628 | 10097 | 69.5  | YLL050C    |
| SGVVNSAFPAPDES LK                     | 62.21  | 760.883 | 507.591 | 6524  | 47.3  | YMR105C    |
| SHINVVVIGHVDSGK                       | 54.43  | 780.928 | 520.955 | 21004 | 150.2 | YPR080W    |
| SIACVLTVINEQQR                        | 48.08  | 815.933 | 544.291 | 9736  | 67.3  | YDL136W    |
| SIAPAYGIPVVLHSDHCAK                   | 68.51  | 1018.03 | 679.019 | 5644  | 49.8  | YKL060C    |
| SIGGEVFIDFTK                          | 61.4   | 656.843 | 438.231 | 10578 | 72.6  | YOL086C    |
| SIIGATSIEDFISK                        | 54.71  | 740.898 | 494.268 | 11495 | 78.4  | YHR183W    |
| SINPDEAVAYGAAVQAAILTGDDESSK           | 78.7   | 1289.14 | 859.761 | 11339 | 90.6  | YAL005C    |
| SINPDEAVAYGAAVQGAITGQSTSDETK          | 59.98  | 1447.21 | 965.14  | 9758  | 79.6  | YDL229W    |
| SINVDLEPGTIDAVR                       | 51.94  | 799.923 | 533.618 | 8451  | 59.3  | YFL037W    |
| SIQGHVPGFAPNLAIQVGNRPDSATYVR          | 44.62  | 1539.32 | 1026.55 | 9721  | 67.2  | YGR204W    |
| SISDVF GKPLSSTLNQDEAVAK               | 26.83  | 1153.6  | 769.401 | 9316  | 64.7  | YBR169C    |
| SISGPVITDVASLK                        | 28.78  | 693.896 | 462.933 | 8603  | 60.2  | YJL130C    |
| SIVPSGASTGVHEALEMR                    | 100.35 | 920.965 | 614.312 | 7444  | 53    | YGR254W    |
| SIVTLDVKPWDDETNLEEMVANVK              | 17.13  | 1373.19 | 915.793 | 11099 | 88.9  | YAL003W    |
| SIYLLAGNDPEGR                         | 23.16  | 702.859 | 468.909 | 7562  | 53.8  | YOR335C    |
| SLANTFLSLDTEGR                        | 111.23 | 762.389 | 508.595 | 10522 | 72.2  | YGL202W    |
| SLDEIIGSNK                            | 46.08  | 538.285 | 359.192 | 5567  | 41.5  | YDR381W    |
| SLDFLNQSFQQK                          | 45.88  | 784.409 | 523.275 | 10512 | 72.2  | YBL045C    |
| SLDLDSIAEVK                           | 38.36  | 651.861 | 434.91  | 12349 | 83.9  | gi 1346343 |
| SLDYDQENTVR                           | 21.67  | 670.31  | 447.209 | 3311  | 27.7  | YIL074C    |
| SLFEGLVADAPK                          | 49.64  | 623.837 | 416.227 | 10002 | 69    | YMR229C    |
| SLGLVSVNAEPAK                         | 16.2   | 692.396 | 461.933 | 7306  | 52.2  | YDL185W    |
| SLIYSTHEVEDCTK                        | 62.28  | 841.39  | 561.263 | 4249  | 33.4  | YBR026C    |
| SLLEVVTGAK                            | 61.41  | 572.832 | 382.224 | 7214  | 51.6  | YOL038W    |
| SLTVPELTQQMFDAK                       | 21.06  | 854.435 | 569.959 | 11341 | 77.5  | YFL037W    |
| SLTYVLDESTAFSAER                      | 14.57  | 894.936 | 596.96  | 10020 | 69.1  | YNL287W    |
| SMTVFDPEPQLADLSTQFFLTK                | 18.73  | 1372.18 | 915.123 | 15892 | 107.4 | YKL210W    |
| SMVEEAEASGR                           | 54.45  | 583.261 | 389.177 | 2994  | 25.7  | YGR155W    |
| SMYQVQNDIGTGK                         | 54.12  | 720.843 | 480.898 | 4769  | 36.6  | YJR105W    |
| SNAIDLFTVGTQIPTEEPSEYQSK              | 18.54  | 1398.18 | 932.459 | 10266 | 83.1  | YMR120C    |
| SNDSEQELLEAFK                         | 57.45  | 755.357 | 503.907 | 9762  | 67.5  | YBR109C    |
| SNFATIADPEAR                          | 42.5   | 646.317 | 431.214 | 5739  | 42.5  | YLR249W    |
| SNGVLNVDNQTSDLVK                      | 16.56  | 851.934 | 568.292 | 6545  | 47.5  | YML024W    |
| SNLAGKPVICATQMLESMTYNRPTR             | 46.58  | 1468.23 | 979.158 | 10821 | 74.1  | YAL038W    |
| SNYDTRVFTPLFER                        | 69.93  | 852.399 | 568.602 | 11356 | 77.6  | YOR335C    |
| SNYGMIAINPGR                          | 49.53  | 646.824 | 431.552 | 6676  | 48.3  | YKL182W    |
| SPALPQADDPVETK                        | 18.65  | 790.912 | 527.61  | 6190  | 45.3  | YHR146W    |
| SPDPFAVLTIDGYQTK                      | 15.57  | 876.446 | 584.633 | 11389 | 77.8  | YER125W    |
| SPLNVGIVGTGIFAR                       | 72.03  | 750.93  | 500.956 | 10931 | 74.9  | YMR315W    |
| SPNPMSLADGVSNDGPIQTNK                 | 15.43  | 1071.51 | 714.676 | 6439  | 55.9  | YNR067C    |

|                            |       |         |         |       |       |         |
|----------------------------|-------|---------|---------|-------|-------|---------|
| SPTESYSDIGGLESQIQEIK       | 70.35 | 1091.03 | 727.69  | 8372  | 69.9  | YDL007W |
| SQAANSVDEALAAVK            | 83.24 | 737.381 | 491.923 | 7790  | 55.2  | YJL130C |
| SQEVEYVDPTVNR              | 28.63 | 768.37  | 512.583 | 4571  | 35.4  | YPR108W |
| SQFLSVFNNSPDEAFYR          | 25.99 | 1061.5  | 708.001 | 9492  | 77.8  | YPR181C |
| SQIDEVVLVGGSTR             | 85.93 | 730.391 | 487.263 | 7118  | 51    | YNL209W |
| SQIFSTAAAGQTSVEIR          | 32.19 | 883.458 | 589.307 | 7209  | 51.6  | YJR045C |
| SQPTESQLILQSPTISSK         | 30.85 | 972.518 | 648.681 | 7329  | 52.3  | YJL173C |
| SQVDEIVLVGGSTR             | 59.4  | 730.391 | 487.263 | 7118  | 51    | YAL005C |
| SSAAGNTVIIGGGDTATVAK       | 67.71 | 895.468 | 597.314 | 4737  | 36.4  | YCR012W |
| SSGLTPNAVVLVATVR           | 46.06 | 792.459 | 528.642 | 9787  | 67.6  | YGR204W |
| SSHPIEVPVNNADEINQIFDAISYSK | 36.88 | 1444.21 | 963.142 | 12817 | 87    | YHR047C |
| SSLSEFTEGGFQWIIEIDIEHGK    | 14.56 | 1255.1  | 837.068 | 15830 | 107   | YIL125W |
| SSNITISNAVGR               | 59.94 | 609.825 | 406.886 | 4108  | 32.6  | YNL209W |
| SSPDENSTLLSNDISILK         | 59.65 | 953.966 | 636.313 | 7722  | 54.7  | YMR205C |
| SSQSPETVYFASELK            | 59.11 | 836.907 | 558.274 | 8198  | 57.7  | YGR124W |
| SSVLADALNAINNAEK           | 92.54 | 815.426 | 543.953 | 12726 | 86.4  | YJL190C |
| SSYGSNNDDSYGSNNDDSYGSSNK   | 32.26 | 1267.48 | 845.32  | 1768  | 21.5  | YMR173W |
| SSYGSSNDDSYGSNNDDSYGSSNK   | 16.68 | 1341    | 894.338 | 1740  | 21.3  | YMR173W |
| STAISLYSEMSDEDVK           | 61.35 | 887.906 | 592.273 | 8567  | 60    | YOR133W |
| STAQVASDLEQLTGFDNIR        | 53.65 | 1033.01 | 689.011 | 10766 | 86.6  | YMR305C |
| STCACFEPSLDYCVVK           | 42.66 | 968.418 | 645.948 | 8558  | 59.9  | YJL130C |
| STITYNLVLLAEAR             | 33.51 | 846.962 | 564.977 | 12171 | 82.8  | YJR139C |
| STLEPVEQVLK                | 20.45 | 621.851 | 414.903 | 7320  | 52.3  | YNL209W |
| STLIEPTSGNTGIGLALIGAIAK    | 75.93 | 1063.61 | 709.407 | 11045 | 88.5  | YGR155W |
| STLINVLTGELLPTSGEVYTHENCR  | 49.53 | 1402.2  | 935.136 | 11197 | 89.6  | YLR249W |
| STQIPCVGISFGVER            | 35.47 | 825.419 | 550.615 | 9490  | 65.8  | YPR033C |
| STSGNTHLGGQDFDTNLEHFK      | 34.63 | 1209.57 | 806.715 | 9055  | 63    | YNL209W |
| SVAAYPSDQDNDVDFGEK         | 15.62 | 921.413 | 614.611 | 6127  | 44.9  | YDL040C |
| SVAELVIGEIISLAR            | 29.11 | 785.464 | 523.979 | 18420 | 125.4 | YIL074C |
| SVAVPVDILDHNNYELK          | 37.43 | 1021.02 | 681.013 | 7552  | 64.1  | YBR072W |
| SVDELITEGNEK               | 55.12 | 667.328 | 445.221 | 5211  | 39.3  | YOL039W |
| SVDELTSLTDYVTR             | 53.94 | 799.899 | 533.602 | 10551 | 72.4  | YMR186W |
| SVEMHHEQLEQGVPGDNVGFNVK    | 75.73 | 1275.61 | 850.74  | 6037  | 44.3  | YPR080W |
| SVGCIVDGVPPGMSLTEADIQPLTR  | 30.49 | 1370.69 | 914.126 | 9298  | 76.4  | YGL148W |
| SVGETVDYIASNPAN            | 41.36 | 826.376 | 551.253 | 7090  | 50.9  | YKL192C |
| SVLDLLNAFTNAPGWPIADFEK     | 22.67 | 1209.62 | 806.749 | 16152 | 124.2 | YML070W |
| SVQYVLEDPIAGPLVK           | 62.03 | 864.483 | 576.657 | 10588 | 72.7  | YHR019C |
| SVVEDDAANNSLVK             | 46.01 | 730.865 | 487.579 | 4201  | 33.1  | YHR063C |
| SVVLCNSTIK                 | 25.93 | 560.805 | 374.206 | 3710  | 30.1  | YDL055C |
| SYELPDGQVITIGNER           | 73.5  | 895.95  | 597.635 | 9598  | 66.4  | YFL039C |
| SYIEGTAVSQADVTVFK          | 60.21 | 907.962 | 605.644 | 8667  | 60.6  | YAL003W |
| TADLVMVLDATK               | 31.3  | 695.386 | 463.927 | 14152 | 95.7  | YGR173W |
| TAEYLKPIINSVIK             | 23.68 | 859.49  | 573.329 | 10567 | 72.5  | YMR105C |
| TAGGSSPATPATPATPTPSSGPK    | 20.38 | 1154.08 | 769.72  | 2791  | 29.1  | YBR079C |
| TAGIQVADDLTVPNPAR          | 91.57 | 928     | 619.002 | 9868  | 68.1  | YHR174W |
| TANDVLTIR                  | 49.42 | 501.783 | 334.857 | 4989  | 37.9  | YAL038W |
| TAPLVVLGNPLLDQFQADVTAEYLAK | 17.55 | 1329.72 | 886.818 | 16365 | 110.6 | YJR105W |
| TAQLSEFDEELYK              | 43.04 | 786.875 | 524.919 | 8459  | 59.3  | YDR023W |
| TAQLTVEDGDNWEVVGK          | 68.88 | 930.952 | 620.971 | 8012  | 56.5  | YPR163C |
| TASEFSAIAQDK               | 69.93 | 691.825 | 461.553 | 4731  | 36.4  | YLR043C |
| TASEIATTELPPTHPIR          | 34.92 | 917.489 | 611.995 | 5239  | 39.5  | YDR099W |
| TASGNIIPSSTGAAK            | 39.76 | 687.865 | 458.912 | 3080  | 26.3  | YGR192C |
| TATYDGEEGILAAK             | 57.69 | 719.857 | 480.24  | 5737  | 42.5  | YGL148W |
| TAVDTVYEAVK                | 49.92 | 598.314 | 399.212 | 6163  | 45.1  | YGL234W |
| TAVELGAVALK                | 40.68 | 536.324 | 357.885 | 6781  | 48.9  | YPL028W |
| TAVVDGVFDEVSLDK            | 45.34 | 797.404 | 531.938 | 9804  | 67.7  | YML028W |
| TCFYAEQGGQEYDTGK           | 72.71 | 927.386 | 618.593 | 4661  | 35.9  | YOR335C |
| TCSDLLLVK                  | 31.38 | 524.789 | 350.195 | 6423  | 46.7  | YKL035W |
| TCSSCGYPAAK                | 22.2  | 601.252 | 401.171 | 1141  | 14.4  | YLR185W |
| TDEEVAEVIGCER              | 27.92 | 753.841 | 502.896 | 6381  | 46.5  | YMR300C |
| TDLGQSLVIGMGGDAFPGTDFIDALK | 22.71 | 1319.66 | 880.107 | 13556 | 105.9 | YOR142W |
| TDPAGYVYVGYK               | 14.39 | 617.293 | 411.864 | 5281  | 39.7  | YGL011C |
| TDPIGDEEQSINDTIFK          | 88.08 | 961.455 | 641.306 | 10237 | 70.4  | YBL076C |
| TDSWFNETLIGGR              | 47.53 | 748.362 | 499.244 | 10456 | 71.8  | YKL080W |
| TDTTYPAGFMDVITLDATNENFR    | 28.02 | 1296.6  | 864.736 | 11676 | 92.9  | YJR145C |
| TEDLWDALADASGK             | 32.39 | 746.352 | 497.904 | 11853 | 80.7  | YKL157W |

|                                |       |         |         |       |       |         |
|--------------------------------|-------|---------|---------|-------|-------|---------|
| TEELQTSSMK                     | 26.02 | 577.274 | 385.185 | 2049  | 20    | YJR045C |
| TELDGILPLVAR                   | 51.06 | 648.88  | 432.922 | 11133 | 76.1  | YAR015W |
| TESSLEWDAQR                    | 23.24 | 661.305 | 441.205 | 4900  | 37.4  | YLR300W |
| TETGIDLENDR                    | 23.76 | 631.797 | 421.533 | 4057  | 32.3  | YJR045C |
| TEWIADYGAAASGR                 | 77.41 | 734.347 | 489.9   | 7429  | 52.9  | YLR060W |
| TFEFLDEDVPDSSNR                | 63.09 | 943.408 | 629.274 | 9475  | 65.7  | YGR285C |
| TFESEAAHGTVTR                  | 23.44 | 703.339 | 469.228 | 2466  | 22.5  | YNL009W |
| TFITQGAYEDR                    | 66.46 | 650.812 | 434.21  | 5104  | 38.6  | YBR127C |
| TFSPQEISAMVLTK                 | 70.88 | 776.408 | 517.941 | 11225 | 76.7  | YNL209W |
| TFSPTDYYPQLQVVESVVNEDER        | 25.45 | 1399.18 | 933.124 | 14467 | 112.2 | YGL173C |
| TFSYAGFEQQPK                   | 29.13 | 701.835 | 468.226 | 6765  | 48.8  | YJL111W |
| TFTDCFNCLPIAAIIDEK             | 43.77 | 1064.51 | 710.008 | 12262 | 96.9  | YER133W |
| TFTTCADNQTTVQFPVYQGER          | 67.88 | 1232.07 | 821.713 | 6745  | 58.1  | YDL229W |
| TFTTVSDNQTTVQFPVYQGER          | 58.51 | 1209.58 | 806.724 | 7057  | 60.5  | YNL209W |
| TFTVDVSSPTENGVPDPASYAK         | 64.98 | 1166.55 | 778.037 | 8805  | 73    | YLR061W |
| TGAAPQTTFNVPANSTPIVSTAATGLQHK  | 21.83 | 1440.75 | 960.833 | 8153  | 57.4  | YDR129C |
| TGANVIEIDFEPLELAR              | 20.14 | 1000.54 | 667.361 | 14028 | 109.2 | YBR208C |
| TGDLAGTATTSSFTEAVIK            | 60.83 | 935.476 | 623.986 | 8442  | 59.2  | YOR136W |
| TGELLCYDHYK                    | 14.84 | 699.822 | 466.883 | 5245  | 39.5  | YLR438W |
| TGETTLLMSK                     | 69.19 | 584.3   | 389.869 | 5881  | 43.4  | YOR230W |
| TGHIAADGVSYYNK                 | 45.07 | 666.831 | 444.89  | 1559  | 17    | YFR053C |
| TGHIAADGVSYYNR                 | 36.44 | 680.834 | 454.225 | 1813  | 18.5  | YGL253W |
| TGIEAFAEALLVIPK                | 25.63 | 786.456 | 524.64  | 15309 | 103.4 | YDR188W |
| TGIWAGVDASQPPATVWADILNK        | 77.49 | 1205.62 | 804.085 | 12214 | 96.6  | YDR226W |
| TGKPLSVELGPGLMETIYDGIQRPLK     | 16.98 | 1406.77 | 938.181 | 12940 | 87.8  | YDL185W |
| TGLDISDDAR                     | 20.88 | 531.757 | 354.84  | 3968  | 31.7  | YNL209W |
| TGLVSVDDDIYQK                  | 31.95 | 726.864 | 484.912 | 6826  | 49.2  | YNR016C |
| TGPFVEGVHVLPK                  | 32.6  | 690.388 | 460.594 | 7396  | 52.7  | YER043C |
| TGPSPPQESQGSFYQR               | 65.08 | 883.411 | 589.276 | 3864  | 31.1  | YOR204W |
| TGTLTTSETAHNMK                 | 83.7  | 746.359 | 497.908 | 1452  | 16.3  | YOR133W |
| TGTTTNDVDYPIPPNHEMIFTTDDK      | 43.68 | 1411.64 | 941.432 | 8348  | 58.6  | YAL038W |
| TGVFEPEFTADGK                  | 21.88 | 699.333 | 466.558 | 7358  | 52.5  | YGR094W |
| TGVIVGEDVHNLFTYAK              | 92.62 | 931.986 | 621.66  | 20935 | 149.7 | YKL060C |
| THGAPTDEVR                     | 30.89 | 541.765 | 361.512 | 946   | 13.2  | YJR104C |
| THMIINVEWGSFDNELK              | 15.55 | 1016.99 | 678.331 | 10927 | 74.8  | YCL040W |
| TIAETLAEELINAAK                | 80.33 | 793.935 | 529.626 | 14420 | 97.5  | YJR123W |
| TIDEIYGVVK                     | 18.87 | 568.813 | 379.545 | 7046  | 50.6  | YNL220W |
| TIEEFETWLSNADTETLK             | 23.42 | 1064.01 | 709.676 | 11273 | 90.1  | YNL247W |
| TIELLEDYIAHAVNIK               | 22.66 | 921.504 | 614.672 | 13513 | 91.5  | YMR235C |
| TIFSNIQDIAEK                   | 25.34 | 689.864 | 460.245 | 9899  | 68.3  | YPL237W |
| TIFTVTPGSEQIR                  | 37.78 | 724.891 | 483.596 | 7267  | 51.9  | YLR304C |
| TIHLINEALDLEELQDLDLNAIALAK     | 36.49 | 1438.77 | 959.513 | 13596 | 92.1  | YJR069C |
| TIIGSEDGLGVECLR                | 47.55 | 809.909 | 540.275 | 8423  | 59.1  | YNR016C |
| TILATGGDDGIVNFWFSLEK           | 22.44 | 1018.52 | 679.349 | 10940 | 87.8  | YDR267C |
| TILSELSALEDPATNEGGVEAASEEK     | 20.29 | 1330.64 | 887.431 | 10442 | 84.4  | YDR429C |
| TIQQIHEEEER                    | 17.7  | 706.344 | 471.232 | 1766  | 18.2  | YGR162W |
| TISTPFIEK                      | 13.21 | 518.29  | 345.862 | 9947  | 68.6  | YJR149W |
| TITLEVSSDTIDNVK                | 57.47 | 882.449 | 588.635 | 7761  | 55    | YKR094C |
| TITPMGGFVHYGEIK                | 13.32 | 825.421 | 550.617 | 8214  | 57.8  | YOR063W |
| TLAETAGLDVNEVLPNLYAAHNVTEPGAOK | 36.74 | 1553.81 | 1036.21 | 9727  | 79.4  | YJL008C |
| TLEDELEVTEGMR                  | 57.94 | 761.359 | 507.908 | 8787  | 61.4  | YLR259C |
| TLLALGQYQSQDPTSK               | 49.27 | 875.454 | 583.972 | 7447  | 53    | YIL076W |
| TLLDYVSILDNLDLSPR              | 15.26 | 974.025 | 649.686 | 15834 | 107   | YPL226W |
| TLMELLTQMDGFDNLGQTK            | 34.62 | 1078.02 | 719.018 | 13128 | 102.9 | YOR259C |
| TLQEGQSEDPNFADSR               | 52.64 | 897.4   | 598.603 | 3934  | 31.5  | YBL050W |
| TLQFVIQEK                      | 35.23 | 553.316 | 369.213 | 7133  | 51.1  | YNL007C |
| TLSDYNIQK                      | 41.83 | 541.28  | 361.189 | 3508  | 28.9  | YKR094C |
| TLSEYNNLLNR                    | 30.07 | 668.846 | 446.233 | 6967  | 50.1  | YPL273W |
| TLSSAQTSVEIDSLFEGIDFYTSITR     | 77.66 | 1484.23 | 989.82  | 15253 | 117.8 | YAL005C |
| TLSSVTQTTVEVDSLFDGEDFESSLTR    | 77.9  | 1482.2  | 988.472 | 12398 | 97.9  | YDL229W |
| TLTFALADGGVPPNNEGR             | 17.83 | 866.437 | 577.96  | 8443  | 59.2  | YOR335C |
| TMNDEDANELIK                   | 26.68 | 696.819 | 464.882 | 4953  | 37.7  | YKL210W |
| TNIDNSTGQAGQANAQSANTVNNR       | 23.2  | 1223.57 | 816.048 | 1511  | 19.5  | YNL098C |
| TNNPETLVALR                    | 43.23 | 614.338 | 409.895 | 6457  | 46.9  | YAL038W |
| TPFQLCSEVLSR                   | 32.08 | 718.864 | 479.578 | 8869  | 61.9  | YDR516C |
| TPGLSNATQVTDLNLTYASR           | 97.74 | 1061.54 | 708.031 | 7124  | 61    | YNL241C |

|                               |        |         |         |       |       |         |
|-------------------------------|--------|---------|---------|-------|-------|---------|
| TPGPGGQAALR                   | 43.54  | 512.78  | 342.189 | 1876  | 18.9  | YCR031C |
| TPIGSFQGSLSK                  | 24.45  | 654.843 | 436.898 | 5869  | 43.3  | YPL028W |
| TPLEPGLLETAIAK                | 32.67  | 726.919 | 484.948 | 9606  | 66.5  | YDL126C |
| TPSELQEEQER                   | 18.88  | 673.315 | 449.213 | 2029  | 19.9  | YDR358W |
| TPSEYIQWR                     | 49.57  | 590.293 | 393.865 | 6885  | 49.6  | YLR249W |
| TPSIDTLDDLAQR                 | 30.98  | 722.868 | 482.247 | 8281  | 58.2  | YLR206W |
| TPTAAAWDSPESHIGVAK            | 39.79  | 919.458 | 613.307 | 5971  | 43.9  | YGR155W |
| TPVFGICLGHQLIAR               | 14.93  | 841.464 | 561.312 | 9678  | 66.9  | YJL130C |
| TQDLLLLDVAPLSLGIETAGGVMTK     | 45.06  | 1278.2  | 852.471 | 14393 | 111.7 | YAL005C |
| TQDVLGENGR                    | 32.81  | 544.77  | 363.516 | 2057  | 20    | YNL178W |
| TQLLGADDDLNAQAQIIR            | 107.09 | 978.013 | 652.345 | 8742  | 61.1  | YPL048W |
| TQLTGLQDDINEFLTR              | 65.59  | 960.987 | 640.994 | 14021 | 94.9  | YJL184W |
| TQWIDYEQCK                    | 20.93  | 685.806 | 457.54  | 6017  | 44.2  | YDR399W |
| TSVAALTEVR                    | 73.45  | 559.314 | 373.212 | 6202  | 45.4  | YHL033C |
| TSDKPIWVLGEPK                 | 25.13  | 735.404 | 490.605 | 7426  | 52.9  | YOR230W |
| TSFFQALGVPTK                  | 53.52  | 648.353 | 432.571 | 10630 | 72.9  | YLR340W |
| TSGPIDLASLEALLGATGGVK         | 30.12  | 985.544 | 657.365 | 15016 | 101.5 | YER089C |
| TSSGNEMPPQDAEGWFYK            | 44.24  | 1022.44 | 681.963 | 7044  | 60.4  | YOL121C |
| TSYGWIECVGCADR                | 61.38  | 837.356 | 558.573 | 8739  | 61.1  | YBR121C |
| TTEEQVENAVDR                  | 67.17  | 695.826 | 464.22  | 4265  | 33.5  | YLR354C |
| TTGIVLDSGDGVTHVVIYAGFSLPHAILR | 16.63  | 1553.34 | 1035.9  | 12342 | 83.9  | YFL039C |
| TTLVANTSNMPVAAR               | 51.83  | 773.406 | 515.94  | 5155  | 39    | YDL185W |
| TTPSFVAFTDTER                 | 23.46  | 736.357 | 491.24  | 8231  | 57.9  | YAL005C |
| TTPSFVGFTDTER                 | 43.41  | 729.349 | 486.568 | 7688  | 54.5  | YLL024C |
| TTPSYVAFTDTER                 | 30.86  | 744.354 | 496.572 | 6491  | 47.1  | YBL075C |
| TTQNPDELWFIADSLK              | 76.45  | 1003.99 | 669.662 | 14190 | 110.3 | YGL253W |
| TTVANFEPSLDYIVAK              | 29.5   | 884.462 | 589.977 | 10518 | 72.2  | YJR109C |
| TTVEFTGESLR                   | 39.53  | 620.314 | 413.879 | 5761  | 42.7  | YBR127C |
| TTVLLDYTRPISDDPEVINK          | 33.28  | 1145.1  | 763.737 | 8763  | 61.2  | YGL037C |
| TTVQVAEEAIVNAMR               | 19.19  | 816.425 | 544.619 | 12077 | 82.2  | YFR050C |
| TTYVTQRPVYGLPANLVDLNVPAK      | 23.24  | 1371.76 | 914.844 | 9707  | 79.3  | YLR044C |
| TVASSGQELSVEER                | 100.32 | 746.368 | 497.914 | 3477  | 28.7  | YER177W |
| TVAVAGNPTDWK                  | 56.15  | 629.825 | 420.219 | 5393  | 40.4  | YNL134C |
| TVAVDSVFEQNEMIDAIAVTK         | 29.79  | 1140.57 | 760.719 | 10169 | 82.5  | YOR063W |
| TVAVLPPNWK                    | 45.57  | 562.827 | 375.554 | 7237  | 51.8  | YDR064W |
| TVESVNIVVSTYADEVLGDVQVYPAR    | 47.23  | 1412.22 | 941.819 | 14297 | 111   | YOR133W |
| TVFESLDQAWSLLR                | 46.52  | 832.936 | 555.626 | 14645 | 99    | YBR127C |
| TVFIQELINNIK                  | 55.97  | 751.932 | 501.624 | 14356 | 97.1  | YJR121W |
| TVGAALTNDPR                   | 45.91  | 557.796 | 372.2   | 2644  | 23.6  | YPL061W |
| TVIFTHGVEPTVVVSSK             | 13.85  | 900.499 | 600.668 | 7000  | 50.3  | YJR105W |
| TVIGEVLLEQAYGGMR              | 48.79  | 868.456 | 579.306 | 12540 | 85.2  | YNR001C |
| TVLDYTIFLDK                   | 26.31  | 728.882 | 486.257 | 12856 | 87.2  | YGR205W |
| TVLITGASAGIGK                 | 54.06  | 594.353 | 396.571 | 5543  | 41.3  | YMR226C |
| TVLVYGHYDVQPAQLEDGWDTEPFK     | 20.89  | 1454.2  | 969.799 | 11010 | 75.4  | YFR044C |
| TVPFVPISGWNGDNMIEATTNAPWYK    | 48.25  | 1454.7  | 970.137 | 12124 | 96    | YPR080W |
| TVPGFPLENLNDISLK              | 22.43  | 935.52  | 624.016 | 14209 | 96.1  | YGR061C |
| TVPGSSLTSVPGFFAAGDVQDSK       | 16.15  | 1134.06 | 756.378 | 10632 | 72.9  | YDR353W |
| TVSQADFPGLEGVAK               | 38.02  | 759.894 | 506.931 | 7813  | 55.3  | YIL078W |
| TVYVVAAPR                     | 25.48  | 531.801 | 354.87  | 4467  | 34.8  | YPR163C |
| TWAPEIAQEILK                  | 22.13  | 699.885 | 466.926 | 11262 | 77    | YER134C |
| TWELMQELPK                    | 44.89  | 637.826 | 425.553 | 10379 | 71.3  | YOR120W |
| TWETYEMR                      | 40.61  | 558.245 | 372.499 | 5851  | 43.2  | YHL015W |
| TYAAEIAHNISAK                 | 55.69  | 694.862 | 463.577 | 5434  | 40.7  | YBL092W |
| TYCLQHVEK                     | 28.15  | 589.287 | 393.194 | 2172  | 20.7  | YFL045C |
| TYIGNLLALSISDNLVVK            | 62.05  | 1018.06 | 679.04  | 11892 | 94.4  | YGR180C |
| VAATLSPAMDILISSNFER           | 18.67  | 1018.03 | 679.022 | 11160 | 89.3  | YCR053W |
| VAAVETLYQDMAAR                | 63.5   | 769.388 | 513.261 | 9789  | 67.6  | YMR242C |
| VADVLSQIEAK                   | 48.91  | 586.83  | 391.556 | 7515  | 53.5  | YMR250W |
| VAFTVDQMR                     | 63.89  | 533.771 | 356.183 | 6056  | 44.5  | YOR133W |
| VAPEEHPVLLTEAPMNP             | 20.09  | 986.514 | 658.012 | 6535  | 47.4  | YFL039C |
| VASANATAAESDVAK               | 72.49  | 702.852 | 468.904 | 2094  | 20.3  | YIL133C |
| VASSQATWVEVLPLTLCSDHENFK      | 15.85  | 1366.17 | 911.118 | 12112 | 82.4  | YLR060W |
| VAVETGVDGVDVIGTSK             | 39.65  | 872.97  | 582.316 | 8941  | 62.3  | YDL131W |
| VAVIGDDVAVGR                  | 42.03  | 585.827 | 390.887 | 5466  | 40.9  | YML070W |
| VAVVAGYGDVVK                  | 68.1   | 567.811 | 378.877 | 4487  | 34.9  | YER043C |
| VCEFMIQLGLQK                  | 20.03  | 776.897 | 518.267 | 10056 | 69.3  | YNL244C |

|                                 |       |         |         |       |       |         |
|---------------------------------|-------|---------|---------|-------|-------|---------|
| VCPAPCEGACTLGIIEDPVGIK          | 31.35 | 1178.57 | 786.05  | 8545  | 71.2  | YDL171C |
| VDALEQETVYR                     | 26.51 | 661.833 | 441.558 | 5319  | 40    | YDL110C |
| VDCSELSEK                       | 40.29 | 533.74  | 356.162 | 1870  | 18.9  | YLL026W |
| VDELLVAR                        | 48.86 | 515.282 | 343.857 | 5693  | 42.2  | YDR226W |
| VDIANDQGNR                      | 64.28 | 607.81  | 405.542 | 2983  | 25.7  | YAL005C |
| VDPLVIELVTGAK                   | 55.18 | 677.403 | 451.938 | 12372 | 84.1  | YGL195W |
| VDTVYDLTK                       | 37.12 | 577.801 | 385.536 | 4985  | 37.9  | YFLO22C |
| VEEMNNIIAASR                    | 64.3  | 673.84  | 449.563 | 6254  | 45.7  | YMR194W |
| VEFGVLTSAFYPVIGSDEK             | 27.62 | 1029.53 | 686.686 | 11441 | 91.3  | YGR094W |
| VEFSIGFER                       | 32.77 | 542.277 | 361.854 | 8751  | 61.1  | YPL160W |
| VEGAVGNLGNVTVTEDGTVTVVSTAK      | 35.01 | 1344.21 | 896.475 | 8683  | 72.1  | YLR061W |
| VEGITEHVNR                      | 18.28 | 577.302 | 385.204 | 1805  | 18.5  | YBR035C |
| VELDALFNIAELK                   | 33.39 | 737.911 | 492.277 | 13696 | 92.7  | YPL218W |
| VELDDYVGLVAK                    | 55.55 | 660.856 | 440.906 | 9715  | 67.2  | YDR129C |
| VELTPVAIAAGR                    | 22.35 | 598.853 | 399.571 | 7303  | 52.2  | YPL091W |
| VENIISWGYGTPGAGAYDIK            | 25.87 | 1137.56 | 758.707 | 9698  | 79.2  | YLR179C |
| VESLGSPSGATK                    | 45.23 | 566.796 | 378.2   | 1693  | 17.8  | YDR155C |
| VETGVIKPGMVVTFAPAGVTEVK         | 30.17 | 1215.67 | 810.782 | 7904  | 66.6  | YPR080W |
| VEVDSFSGAK                      | 19.21 | 519.759 | 346.842 | 3573  | 29.3  | YGR148C |
| VFDALNDLEQLK                    | 48.08 | 702.872 | 468.917 | 11021 | 75.4  | YBR218C |
| VFEEEGAFIEALER                  | 20.46 | 819.904 | 546.938 | 12162 | 82.7  | YJR016C |
| VFLGIYYVDQIQDGVNTIK             | 31.5  | 1093.08 | 729.056 | 11573 | 92.2  | YGR279C |
| VFNLPLFPTTTIGSFQTK              | 64.61 | 1054.57 | 703.386 | 11922 | 94.6  | YER091C |
| VFSLDPQYLVDLDRPEFAGYSK          | 43.75 | 1280.14 | 853.764 | 13658 | 92.5  | YMR116C |
| VGDPFDESTFQGAQTSQMQLNK          | 26.05 | 1214.56 | 810.041 | 6988  | 60    | YOR374W |
| VGGASEVEVGEK                    | 74.44 | 580.793 | 387.531 | 2140  | 20.5  | YLR259C |
| VGHDNLVGEVIR                    | 52.15 | 654.357 | 436.574 | 5560  | 41.4  | YDL185W |
| VGIADTVGCANPR                   | 31.78 | 665.333 | 443.891 | 4180  | 33    | YDL131W |
| VGLIGSCTNSSYEDMSR               | 88.72 | 938.414 | 625.945 | 6607  | 47.8  | YLR304C |
| VGQAVETVGQAGRPK                 | 29.72 | 748.913 | 499.611 | 1820  | 18.6  | YHR027C |
| VGQSLIVSNDELSK                  | 25.23 | 788.415 | 525.946 | 6549  | 47.5  | YBR078W |
| VGSTSENIQTK                     | 48.54 | 582.299 | 388.535 | 1231  | 15    | YOR204W |
| VIAIDINDPLAPK                   | 44.75 | 689.901 | 460.27  | 9756  | 67.4  | YBR011C |
| VIDDVNEEDWNLLEK                 | 66.75 | 915.941 | 610.963 | 9978  | 68.8  | YDL195W |
| VIDVDGNPVIQVLEETK               | 96.44 | 1080.56 | 720.707 | 9583  | 78.4  | YDL229W |
| VIEQPITSETAMK                   | 46.89 | 723.879 | 482.922 | 4677  | 36    | YOL127W |
| VILFIGDGSGLQTLVQEISTMIR         | 30.79 | 1217.17 | 811.786 | 17774 | 120.5 | YLR044C |
| VINDAFGIEEGLMTTVHSLTATQK        | 43.65 | 1288.16 | 859.107 | 14444 | 97.7  | YGR192C |
| VINDAFGIEEGLMTTVHSMATATQK       | 26.02 | 1297.14 | 865.093 | 13500 | 91.4  | YJL052W |
| VISCLAELQQFEK                   | 31.5  | 782.906 | 522.273 | 10008 | 69    | YGL206C |
| VISDDYVTSDSGTGIVHNAFAGEEDNAACKL | 27.23 | 1676.77 | 1118.18 | 6727  | 58    | YBL076C |
| VITLPDYPGVDADNIK                | 16.3  | 865.454 | 577.305 | 9309  | 64.6  | YBR072W |
| VIIQSLEDLIDCCK                  | 56.69 | 878.418 | 585.948 | 11692 | 79.7  | YMR300C |
| VLDALFPCVQGGTTCIPGAFGCGK        | 21.19 | 1263.1  | 842.404 | 10128 | 82.2  | YDL185W |
| VLDEVVVDNFDQK                   | 39.3  | 760.386 | 507.259 | 8059  | 56.8  | YLR259C |
| VLDTGGPISVPVGR                  | 26.87 | 683.888 | 456.261 | 6921  | 49.8  | YJR121W |
| VLEGGVIEDR                      | 48.54 | 600.335 | 400.559 | 6304  | 46    | YML074C |
| VLEQLSGQTPVQSK                  | 58.5  | 757.415 | 505.279 | 4333  | 33.9  | YGR085C |
| VLGSGEPISPDLEWYHEK              | 24.65 | 1171.08 | 781.055 | 11327 | 77.4  | YLR153C |
| VLLSICLLTDANPDDPLVPEIAHIYK      | 69.09 | 1503.8  | 1002.87 | 13326 | 104.3 | YBR082C |
| VLNEQVDESYGLR                   | 72.53 | 761.381 | 507.923 | 5959  | 43.9  | YER110C |
| VLVQDLLHPTAASEAR                | 43.58 | 860.473 | 573.984 | 7758  | 55    | YHR021C |
| VNDNNDDDWNEPELK                 | 38.52 | 966.398 | 644.601 | 5755  | 42.6  | YCR088W |
| VNLDTDCQYAYLTGIR                | 74.37 | 951.457 | 634.64  | 9502  | 65.8  | YKL060C |
| VNLENPIAVLDSYTPSTNEPYAR         | 49.01 | 1387.21 | 925.14  | 12696 | 86.2  | YKL182W |
| VNPETGIIDYDTLEK                 | 70.49 | 853.928 | 569.621 | 8343  | 58.6  | YLR058C |
| VNQAIALLTIGAR                   | 75.97 | 670.406 | 447.273 | 10169 | 70    | YJR123W |
| VNQJGTLSSEIK                    | 48.43 | 644.859 | 430.242 | 6110  | 44.8  | YGR254W |
| VNQNLLEDHSFINYK                 | 20.68 | 917.46  | 611.976 | 7972  | 56.3  | YLR304C |
| VNSSGPGSSFGELALMYNSPR           | 18.68 | 1085.52 | 724.013 | 8790  | 72.9  | YIL033C |
| VNVVLGSQWGDEGK                  | 56.19 | 744.378 | 496.588 | 7271  | 52    | YNL220W |
| VPAINVNDSVTK                    | 49.13 | 628.846 | 419.566 | 4551  | 35.3  | YER043C |
| VPANFISEGLDQTR                  | 44.81 | 773.897 | 516.267 | 8406  | 59    | YBL076C |
| VPEQPVSVEEAIDVAYETFK            | 31.82 | 1175.1  | 783.733 | 16627 | 127.6 | YBR006W |
| VPFCPLVGSSELYSVEVK              | 36.87 | 962     | 641.669 | 11585 | 79    | YDR190C |
| VPFLQDISQLVR                    | 50.91 | 707.906 | 472.273 | 13171 | 89.3  | YGL195W |

|                                  |       |         |         |       |       |         |
|----------------------------------|-------|---------|---------|-------|-------|---------|
| VPLSDNAIIEANLKG                  | 37.51 | 777.43  | 518.623 | 8547  | 59.9  | YGL076C |
| VPPTIAQFYTLDR                    | 29.9  | 824.938 | 550.295 | 9840  | 67.9  | YHL033C |
| VPTVDVSVVDLTVK                   | 90.4  | 735.924 | 490.952 | 9921  | 68.5  | YGR192C |
| VQDDEVGDGTTSTVLSAELLR            | 31.34 | 1152.58 | 768.724 | 10064 | 81.7  | YIL142W |
| VQEQAILSCEIQTMMVADAK             | 17.99 | 1067.53 | 712.022 | 11551 | 92    | YDR395W |
| VQPVPQSQSTSTYPGQGMPTPK           | 38.05 | 1114.55 | 743.372 | 4048  | 38    | YNL007C |
| VQQLQQQQAQQLFQQQLQK              | 15.49 | 1235.15 | 823.766 | 5683  | 50.1  | YNL243W |
| VQSEYLGIPPEGPFK                  | 29.43 | 846.928 | 564.954 | 9305  | 64.6  | YER043C |
| VQTVTTEDGETVK                    | 33.61 | 703.854 | 469.572 | 2016  | 19.8  | YER067W |
| VQVGDIVTVGQCRPISK                | 61.53 | 928.507 | 619.34  | 6375  | 46.4  | YDR025W |
| VSPEVVYVAEK                      | 36.81 | 610.332 | 407.224 | 5164  | 39    | YCL030C |
| VSSASAAASESDVAK                  | 87.42 | 690.336 | 460.56  | 1686  | 17.7  | YNL069C |
| VSSVLSALEGK                      | 69.29 | 545.311 | 363.877 | 8388  | 58.9  | YOL039W |
| VSEGVNVEK                        | 42.97 | 530.288 | 353.861 | 3963  | 31.7  | YLR448W |
| VSWGPNMKPAVSNPSPPSPSAPSLTTGLGAK  | 18.57 | 1511.77 | 1008.18 | 6579  | 56.9  | YLR080C |
| VTAFPVNDGCLNFVDENDEVLLAGFGR      | 45.74 | 1484.71 | 990.143 | 14049 | 95.1  | YGR118W |
| VTDGALVVVDTIEGVCVQTETVLR         | 71.8  | 1287.18 | 858.455 | 15569 | 105.2 | YOR133W |
| VTNMEFQYPGTSKPQJTDINFQCSLSSR     | 51.44 | 1624.77 | 1083.52 | 8110  | 68    | YLR249W |
| VTTDSGDGWCTFEAK                  | 70.78 | 808.848 | 539.568 | 6919  | 49.8  | YOR276W |
| VTVVEFQPIQIGASMDGEVAK            | 27.51 | 1053.03 | 702.358 | 7612  | 64.5  | YFL018C |
| VTYDITSKPPATVEWE                 | 52.18 | 918.457 | 612.64  | 8598  | 60.2  | YMR217W |
| VVDETDAPK                        | 20.53 | 551.767 | 368.18  | 1327  | 15.6  | YJR025C |
| VVDISETSCIVELSAKPTR              | 16.5  | 1052.55 | 702.037 | 8310  | 58.4  | YCL009C |
| VVDLEDAVPDSK                     | 27.45 | 643.827 | 429.554 | 6230  | 45.5  | YDL171C |
| VVDLIEYVAK                       | 60.99 | 574.832 | 383.557 | 9694  | 67    | YJL052W |
| VVDPETTLFLIASK                   | 14.8  | 766.932 | 511.624 | 12332 | 83.8  | YBR196C |
| VVEVCLADLQGSSEHDSFR              | 38.7  | 1030.99 | 687.662 | 6708  | 57.8  | YML063W |
| VVGLSSLPEIYEK                    | 49.22 | 717.398 | 478.601 | 9546  | 66.1  | YMR303C |
| VVGLSTLPEIYEK                    | 41.64 | 724.406 | 483.273 | 9421  | 65.3  | YOL086C |
| VVITAPSSAPMFVVGVNHTK             | 13.33 | 1071.07 | 714.386 | 8447  | 59.3  | YJL052W |
| VVITAPSSSTAPMFVMGVNNEEK          | 35.39 | 1104.06 | 736.374 | 8499  | 70.8  | YGR192C |
| VVNEPTAAALAYGLEK                 | 88.98 | 823.443 | 549.298 | 8819  | 61.6  | YJR045C |
| VVNMEFPIDEATGK                   | 29.7  | 775.382 | 517.257 | 8970  | 62.5  | YOR361C |
| VVNVAIVIGAGVVSFAFLDQLLAMK        | 43.22 | 1186.17 | 791.119 | 18293 | 124.4 | YJR139C |
| VVNYNHLLPTR                      | 32.69 | 663.37  | 442.582 | 5716  | 42.4  | YHR010W |
| VVVFEDAPAGIAAGK                  | 34.01 | 722.396 | 481.933 | 7561  | 53.7  | YIL053W |
| VYEPDLLVGLDK                     | 60.18 | 679.9   | 453.602 | 11909 | 81.1  | YDL083C |
| VYFQGGNNELGTAVGK                 | 34.69 | 908.947 | 606.3   | 7594  | 53.9  | YGL030W |
| WAGNANELNAAYAADGYAR              | 98.29 | 999.459 | 666.641 | 7687  | 54.5  | YLR044C |
| WASLANSVMSNIARPFLSFK             | 15.67 | 1177.6  | 785.404 | 13501 | 91.4  | YKL081W |
| WEAWENLK                         | 26.28 | 538.264 | 359.178 | 8029  | 56.6  | YGR037C |
| WFFDASKPTLISSDSIIR               | 21.75 | 1042.05 | 695.033 | 11695 | 79.7  | YNL160W |
| WGLKPYLFLVNNNDGYTIEK             | 46.49 | 1135.6  | 757.4   | 10404 | 84.1  | YLR044C |
| WSEVCHYIITDIPVEYGGDIAISGK        | 40.12 | 1488.73 | 992.82  | 11418 | 77.9  | YLR179C |
| WSFEVEVK                         | 43.65 | 576.782 | 384.857 | 8837  | 61.7  | YJR123W |
| WVNNILYEGAESER                   | 34.45 | 840.405 | 560.606 | 8612  | 60.3  | YLR270W |
| YAGEVSHDK                        | 45.73 | 560.749 | 374.168 | 832   | 12.5  | YGR192C |
| YAPGTIVLYAER                     | 16.06 | 676.864 | 451.578 | 8043  | 56.7  | YNL178W |
| YAQDGAGIER                       | 23.5  | 540.259 | 360.509 | 1739  | 18.1  | YOR063W |
| YDCSSADINPIGGISK                 | 43.81 | 848.896 | 566.266 | 6698  | 48.4  | YHR074W |
| YDIDIDQK                         | 26.67 | 505.245 | 337.166 | 4715  | 36.3  | YDR516C |
| YDLEAWFPYQK                      | 28.98 | 730.348 | 487.235 | 11599 | 79.1  | YDR023W |
| YDNQIAVGLDFQK                    | 37.07 | 829.415 | 553.279 | 11317 | 77.3  | YKL210W |
| YDSASDNVYMNAEQEEK                | 86.74 | 996.91  | 664.942 | 4941  | 37.7  | YHR179W |
| YEELASLGNIR                      | 47.25 | 689.372 | 459.917 | 10143 | 69.8  | YBR169C |
| YFDGLIIVGGFEAFESLHQLER           | 21.85 | 1335.17 | 890.446 | 16321 | 110.3 | YMR205C |
| YEIISQQPENVSNLSK                 | 83.43 | 924.97  | 616.983 | 6536  | 47.4  | YKL035W |
| YGADIVTHSATK                     | 24.09 | 631.822 | 421.551 | 2399  | 22.1  | YLR303W |
| YGANPHQKPAQAYVSQQDSLPHK          | 24.46 | 1287.64 | 858.763 | 5645  | 41.9  | YMR120C |
| YGASAGNVGDEGGVAPNIQTAEALDLIVDAIK | 79.74 | 1629.31 | 1086.54 | 16781 | 128.8 | YHR174W |
| YGATSTNPAK                       | 28.02 | 505.251 | 337.17  | 996   | 13.5  | YJL177W |
| YGCSVTDACIGWESTEQVLELLAEGVR      | 47.85 | 1521.71 | 1014.81 | 15307 | 118.2 | YDR035W |
| YGEHSIEVPGAVK                    | 25.28 | 693.357 | 462.573 | 4288  | 33.7  | YIL053W |
| YGGVYVGTLSKPEVK                  | 45.36 | 798.935 | 532.959 | 5463  | 40.8  | YLR044C |
| YGHAEFDVPILESPEGK                | 17.77 | 944.46  | 629.976 | 8804  | 61.5  | YLR438W |
| YGILSDDLHEIITVGPHPFK             | 38.28 | 1190.65 | 794.102 | 17101 | 115.7 | YGL076C |



|                            |        |         |         |       |       |         |
|----------------------------|--------|---------|---------|-------|-------|---------|
| YGLNYYNNECR                | 62.68  | 716.301 | 477.87  | 4074  | 32.4  | YBL076C |
| YGLNHVVALIENK              | 21.64  | 735.409 | 490.609 | 8935  | 62.3  | YHL033C |
| YGLNHVVSLIENK              | 40.87  | 743.407 | 495.94  | 8498  | 59.6  | YLL045C |
| YGLTGEGQTVQMATLSEGQR       | 63.72  | 1063.51 | 709.344 | 6149  | 53.6  | YER036C |
| YGPLLVDIIDPAK              | 16.58  | 707.403 | 471.938 | 12205 | 83    | YKL127W |
| YGSFIVDALVDYK              | 71.82  | 745.382 | 497.257 | 12297 | 83.6  | YNR016C |
| YGVIVHDIATPNLIDR           | 30.43  | 898.489 | 599.328 | 8531  | 59.8  | YDL055C |
| YGVISITDACIGWETTEDVLR      | 33.25  | 1143.04 | 762.363 | 10536 | 85    | YBR249C |
| YHGEVEIGCDGVSVEYYPGFR      | 17.49  | 1217.04 | 811.699 | 8989  | 62.6  | YCL040W |
| YHIEEGSR                   | 45.89  | 560.257 | 373.84  | 1446  | 16.3  | YCR012W |
| YIEDDQEPVQGGIFALSWLDSQK    | 14.39  | 1319.64 | 880.094 | 12282 | 97.1  | YMR092C |
| YIEWLSSPK                  | 20.63  | 561.795 | 374.866 | 8252  | 58    | YPL226W |
| YINEGNSVGSVNFPEVSLK        | 14.92  | 1027.02 | 685.013 | 7682  | 65    | YIL074C |
| YINESVNEFSR                | 34.35  | 679.323 | 453.218 | 5238  | 39.5  | YIL041W |
| YIPGEPEFLPFVNELPK          | 41.02  | 995.022 | 663.684 | 13724 | 92.9  | YDR023W |
| YIQTEQQIEIPEGVTVSIK        | 16.07  | 1088.08 | 725.723 | 8003  | 67.3  | YNL067W |
| YIQTEQQIEVPEGVTVSIK        | 38.09  | 1081.07 | 721.051 | 7240  | 61.8  | YGL147C |
| YLAAYLLLNAAGNTPDATK        | 26.5   | 990.525 | 660.686 | 11927 | 81.2  | YOL039W |
| YLAAYLLLQVGGNAAPSAADIK     | 38.7   | 1110.11 | 740.407 | 12624 | 85.7  | YDR382W |
| YLAEFSSGDAR                | 79.7   | 608.286 | 405.86  | 4893  | 37.4  | YDR099W |
| YLDGMFAWTLYDAK             | 32.19  | 847.4   | 565.269 | 13365 | 90.6  | YPR145W |
| YGLKPGSIDAISQVINIAC        | 41.69  | 1050.61 | 700.74  | 12057 | 82    | YKL182W |
| YLIENFSAQLQNPEGK           | 86.35  | 925.968 | 617.648 | 9594  | 66.4  | YGR180C |
| YLPGITLPDNLVANPDLIDSVK     | 41.73  | 1184.14 | 789.765 | 11405 | 91    | YDL022W |
| YLSEIDLPK                  | 31.77  | 539.295 | 359.866 | 7261  | 51.9  | YFL045C |
| YLTPSSLVAGNPK              | 26.54  | 673.869 | 449.582 | 6753  | 48.8  | YDR129C |
| YNEIVNLTLPDGTVR            | 51.7   | 852.452 | 568.637 | 9711  | 67.1  | YBR127C |
| YNLDYYLEVVEK               | 39.08  | 774.385 | 516.592 | 11651 | 79.4  | YBR218C |
| YNPDDTIAPPQDATEESQTK       | 13.29  | 1110.5  | 740.669 | 3691  | 35.5  | YOR230W |
| YNSDAQTYVLESTLEGHSDWVR     | 68.65  | 1285.59 | 857.398 | 10600 | 72.7  | YLR208W |
| YPGQLNSDLR                 | 31.2   | 581.796 | 388.2   | 4438  | 34.6  | YFL037W |
| YPIEHGIVTNWDDMEK           | 64.02  | 973.951 | 649.637 | 8393  | 58.9  | YFL039C |
| YPIVSIEDPFAEDDWEAWSHFFK    | 44.53  | 1414.65 | 943.434 | 15746 | 106.4 | YGR254W |
| YPMGVVTSIDIK               | 22.58  | 662.826 | 442.22  | 11146 | 76.2  | YBL020W |
| YQGYAEDVR                  | 25.45  | 550.754 | 367.505 | 2773  | 24.4  | YIL078W |
| YSYGQDLVSFYQDGPYDMIR       | 28.22  | 1237.55 | 825.37  | 10476 | 84.6  | YBR092C |
| YTNPVVIQAGAGAAVTAAGVLGDVIK | 102.22 | 1256.69 | 838.13  | 11489 | 91.6  | YJR139C |
| YTVSFIEGDGIGPEISK          | 45.45  | 906.457 | 604.64  | 9856  | 68.1  | YOR136W |
| YVDPNVLPETESLALVIDR        | 86.42  | 1072.07 | 715.048 | 10897 | 87.5  | YKL152C |
| YVHIIEDSPVFPVIMDSK         | 23.32  | 1045.04 | 697.027 | 9172  | 75.6  | YLR060W |
| YWGTPIPLWVSDDFEEVVCVGSIK   | 15.45  | 1398.68 | 932.791 | 15147 | 117   | YBL076C |
| YNAVNPFEFMEDVATAGK         | 84.39  | 1083.5  | 722.666 | 13284 | 104   | YGR180C |

Supplemental Figure 3

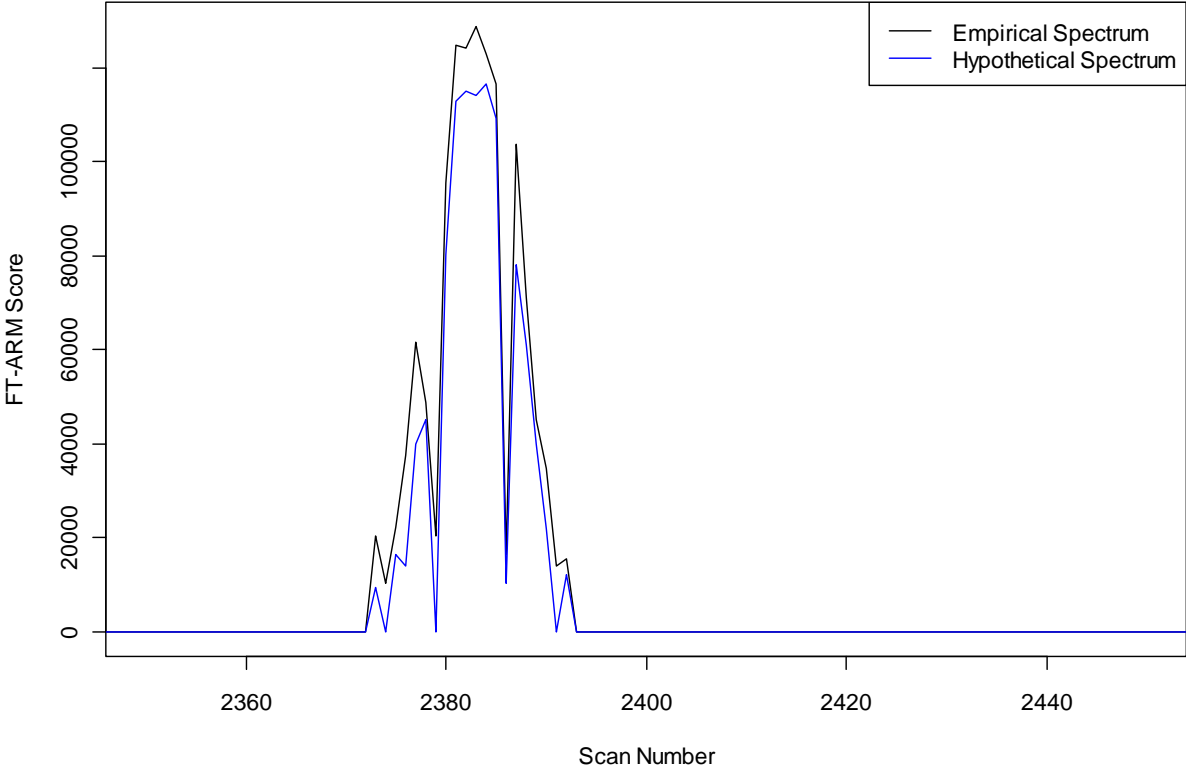

## Supplemental Figure 4

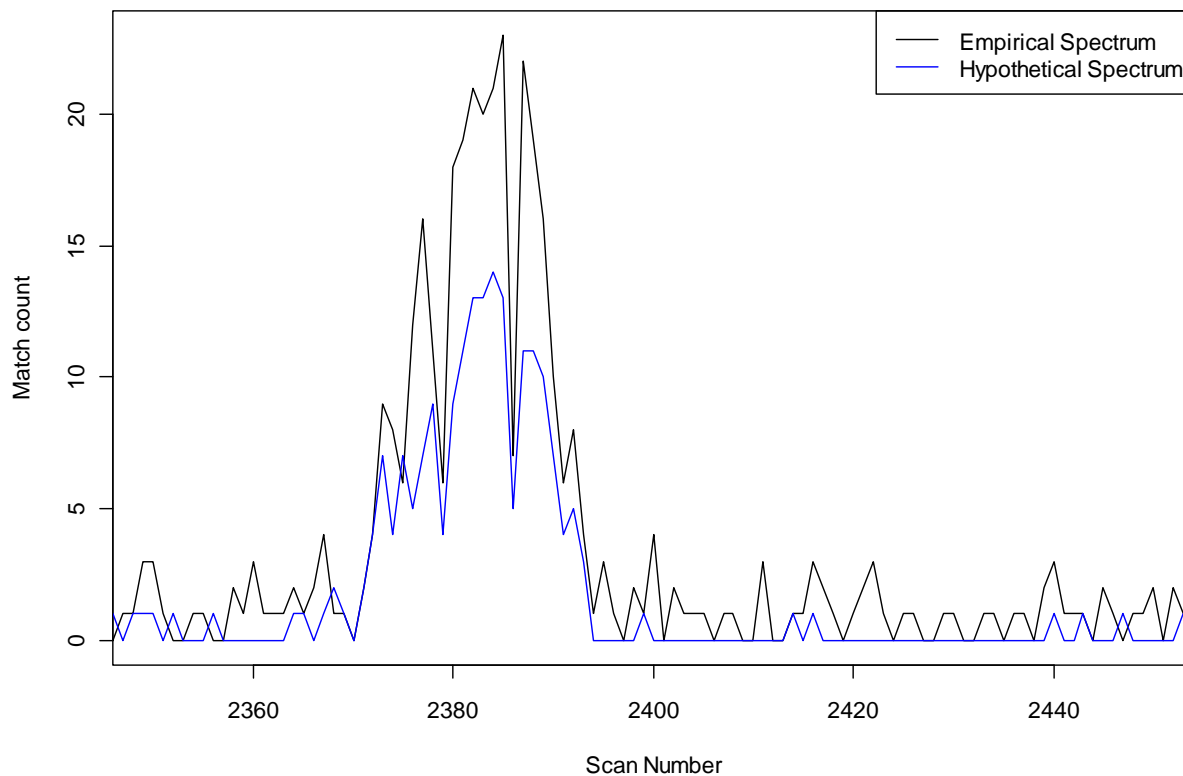

Supplemental Figure 3 is a score chromatogram comparison of hypothetical vs. spectral library FT-ARM scored data. The calculation was normalized using the scalar dot-product. This shows that the FT-ARM process is compatible with spectral library data, with the caveat that it is acquired using a high resolution mass analyzer. In Supplemental Figure 4, it is shown the difference in the number of matching peaks between the spectral data and the hypothetical spectrum. It is clear that the spectral data has approximately double the number of matching peaks for the peptide of interest. The peptide shown from yeast ENO\_2, AVDDFLISLDGTANK.

Supplemental Figure 5

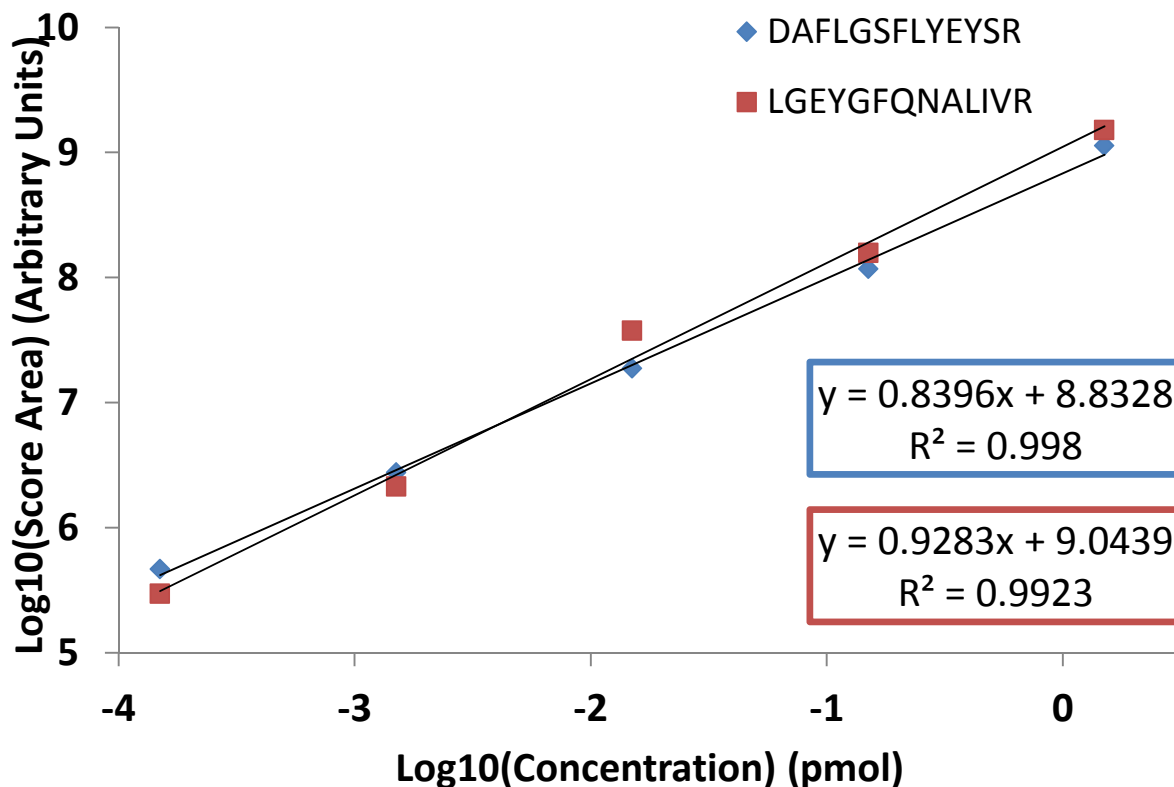

Supplemental Figure 5 was generated by processing the data presented in 6B without any normalization and by tracking accurate fragment masses with retention time constraints. This approach has not been exploited in any of the data presented in the manuscript simply because the authors performed this analysis subsequent to the review process. We intend to pursue this approach as it allows us to gain access to quantitative information at lower concentration, even levels that were only achievable with the triple quadrupole previously, and appears to have greater linearity.

Supplemental Figure 6 was generated by normalizing each peptide score area to a reference acquisition in which no dilution was made or yeast background present. The data was then plotted on the log scale to indicate that relative error contributions and medians are centered very near to the expected ratios. This figure was generated subsequent to the review process.

Supplemental Figure 6

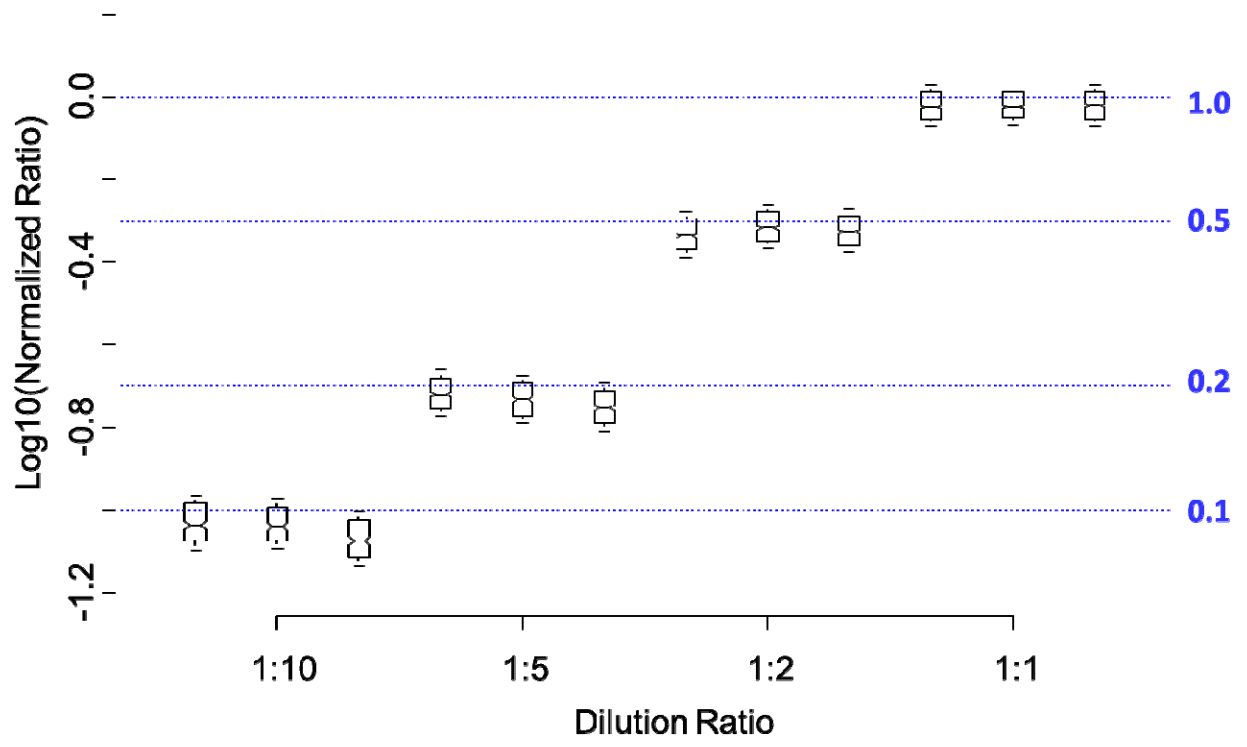

Supplement: NIHMS359443-supplement-1_si_001.pdf [file NIHMS359443-supplement-1_si_001.pdf]
